# Supplementary material for: Dynamic and reversible transcriptomic age shifts induced by COVID-19 in Korean whole blood
Source: Aging (Albany NY). 2025 Jun 10;17(6):1484–510. doi: 10.18632/aging.206270 (PMC12245201; doi:10.18632/aging.206270)
Supplement: Supplementary Table 1 [file aging-17-206270-s002.xlsx]

## Sheet: Supplementary Table 1
Supplementary Table 1. List of 301 genes significantly correlated with age in the training data (sorted by descending order of absolute Pearsons'r value)
index	GeneSymbol	Slope	R^2	Pearsons'r	FDR	Test Significant ?
1	ENSG00000174807_CD248	-2.80924	0.39784	-0.630745	9.49767e-38	TRUE
2	ENSG00000163520_FBLN2	-1.35904	0.381477	-0.617638	5.14698e-36	TRUE
3	ENSG00000173114_LRRN3	-5.93873	0.375117	-0.612468	2.05159e-35	TRUE
4	ENSG00000091129_NRCAM	-1.28659	0.35799	-0.598323	1.73961e-33	TRUE
5	ENSG00000112394_SLC16A10	-1.03336	0.317378	-0.563364	6.37282e-29	TRUE
6	ENSG00000185090_MANEAL	0.561565	0.304419	0.551742	1.42957e-27	TRUE
7	ENSG00000106477_CEP41	-0.975579	0.29013	-0.538637	4.13156e-26	TRUE
8	ENSG00000136002_ARHGEF4	-0.524579	0.289766	-0.5383	4.13156e-26	TRUE
9	ENSG00000047634_SCML1	-1.51033	0.274005	-0.523455	1.71986e-24	TRUE
10	ENSG00000228956_SATB1-AS1	-1.57192	0.270988	-0.520565	3.20233e-24	TRUE
11	ENSG00000166471_TMEM41B	-2.41032	0.267355	-0.517064	6.96004e-24	TRUE
12	ENSG00000232021_LEF1-AS1	-0.652342	0.253054	-0.503045	1.89375e-22	TRUE
13	ENSG00000166669_ATF7IP2	-1.69033	0.249316	-0.499316	4.19701e-22	TRUE
14	ENSG00000169918_OTUD7A	-0.669051	0.247999	-0.497995	5.01823e-22	TRUE
15	ENSG00000235823_OLMALINC	-0.333689	0.247938	-0.497934	5.01823e-22	TRUE
16	ENSG00000258511_LINC02295	-0.604082	0.247419	-0.497412	5.31087e-22	TRUE
17	ENSG00000106484_MEST	-0.519608	0.243796	-0.493757	1.16114e-21	TRUE
18	ENSG00000184867_ARMCX2	-0.569039	0.240495	-0.490402	2.3557e-21	TRUE
19	ENSG00000154153_RETREG1	-2.02016	0.239793	-0.489687	2.62428e-21	TRUE
20	ENSG00000256039_LINC02446	-2.57639	0.234212	-0.483955	9.00489e-21	TRUE
21	ENSG00000134352_IL6ST	-14.2464	0.233477	-0.483195	1.01497e-20	TRUE
22	ENSG00000072195_SPEG	-1.3454	0.232403	-0.482082	1.23896e-20	TRUE
23	ENSG00000152990_ADGRA3	-0.378455	0.230777	-0.480392	1.71858e-20	TRUE
24	ENSG00000144290_SLC4A10	-2.97868	0.230359	-0.479957	1.81179e-20	TRUE
25	ENSG00000183691_NOG	-2.12711	0.224016	-0.473304	7.35305e-20	TRUE
26	ENSG00000172766_NAA16	-2.12444	0.223703	-0.472972	7.59061e-20	TRUE
27	ENSG00000108370_RGS9	1.52737	0.220691	0.469777	1.44336e-19	TRUE
28	ENSG00000135318_NT5E	-2.43132	0.219956	-0.468995	1.64241e-19	TRUE
29	ENSG00000187862_TTC24	-1.02155	0.219536	-0.468547	1.74323e-19	TRUE
30	ENSG00000138795_LEF1	-21.0411	0.219023	-0.467998	1.89154e-19	TRUE
31	ENSG00000113721_PDGFRB	3.22407	0.217007	0.46584	2.87962e-19	TRUE
32	ENSG00000265817_FSBP	-0.416923	0.213943	-0.46254	5.45165e-19	TRUE
33	ENSG00000091409_ITGA6	-7.03507	0.213879	-0.46247	5.45165e-19	TRUE
34	ENSG00000152495_CAMK4	-8.81678	0.213645	-0.462217	5.57562e-19	TRUE
35	ENSG00000126353_CCR7	-31.3845	0.213274	-0.461816	5.88481e-19	TRUE
36	ENSG00000172116_CD8B	-11.6762	0.211113	-0.45947	9.26718e-19	TRUE
37	ENSG00000059588_TARBP1	-3.79711	0.207707	-0.455748	1.92326e-18	TRUE
38	ENSG00000257495_KRT73-AS1	-0.514848	0.207441	-0.455457	1.98613e-18	TRUE
39	ENSG00000160789_LMNA	4.23573	0.206522	0.454447	2.37289e-18	TRUE
40	ENSG00000073861_TBX21	17.3326	0.2063	0.454203	2.43026e-18	TRUE
41	ENSG00000181690_PLAG1	-0.816498	0.204108	-0.451784	3.85084e-18	TRUE
42	ENSG00000134986_NREP	-0.966352	0.199447	-0.446595	1.05021e-17	TRUE
43	ENSG00000161381_PLXDC1	-3.04836	0.198536	-0.445574	1.25309e-17	TRUE
44	ENSG00000205336_ADGRG1	29.6409	0.197624	0.444549	1.49589e-17	TRUE
45	ENSG00000167460_TPM4	14.7771	0.195411	0.442053	2.37484e-17	TRUE
46	ENSG00000132718_SYT11	4.37029	0.194155	0.440631	3.03488e-17	TRUE
47	ENSG00000134709_HOOK1	-0.874569	0.194013	-0.440469	3.03488e-17	TRUE
48	ENSG00000135631_RAB11FIP5	3.96434	0.193994	0.440447	3.03488e-17	TRUE
49	ENSG00000135362_PRR5L	7.33484	0.19297	0.439284	3.71698e-17	TRUE
50	ENSG00000205268_PDE7A	-10.4411	0.192723	-0.439002	3.84482e-17	TRUE
51	ENSG00000065989_PDE4A	2.77266	0.191503	0.437611	4.85806e-17	TRUE
52	ENSG00000150687_PRSS23	6.53076	0.191469	0.437572	4.85806e-17	TRUE
53	ENSG00000154814_OXNAD1	-3.58129	0.191159	-0.437217	5.09934e-17	TRUE
54	ENSG00000157978_LDLRAP1	-17.0276	0.190864	-0.43688	5.33677e-17	TRUE
55	ENSG00000290577_ENSG00000290577	-1.64575	0.189721	-0.43557	6.71849e-17	TRUE
56	ENSG00000132932_ATP8A2	-0.336195	0.186992	-0.432426	1.19112e-16	TRUE
57	ENSG00000184613_NELL2	-9.4839	0.186917	-0.432339	1.19112e-16	TRUE
58	ENSG00000030419_IKZF2	-2.8506	0.186638	-0.432016	1.24347e-16	TRUE
59	ENSG00000170485_NPAS2	-0.572715	0.186157	-0.43146	1.35635e-16	TRUE
60	ENSG00000047849_MAP4	8.17983	0.183844	0.42877	2.19902e-16	TRUE
61	ENSG00000182983_ZNF662	-0.477621	0.182794	-0.427544	2.67247e-16	TRUE
62	ENSG00000287315_ENSG00000287315	-0.489275	0.182788	-0.427537	2.67247e-16	TRUE
63	ENSG00000167123_CERCAM	1.50936	0.182623	0.427344	2.72517e-16	TRUE
64	ENSG00000158292_GPR153	1.36194	0.181595	0.42614	3.32623e-16	TRUE
65	ENSG00000037280_FLT4	-1.44138	0.181553	-0.42609	3.32623e-16	TRUE
66	ENSG00000214279_SCART1	-2.25059	0.181446	-0.425965	3.35182e-16	TRUE
67	ENSG00000135926_TMBIM1	13.5727	0.181236	0.425718	3.45472e-16	TRUE
68	ENSG00000137193_PIM1	23.5922	0.180952	0.425385	3.61428e-16	TRUE
69	ENSG00000232434_AJM1	2.4152	0.180889	0.425311	3.61428e-16	TRUE
70	ENSG00000177565_TBL1XR1	-7.85905	0.180142	-0.424431	4.18368e-16	TRUE
71	ENSG00000062524_LTK	-3.34858	0.178937	-0.423009	5.34347e-16	TRUE
72	ENSG00000117479_SLC19A2	-0.389504	0.178573	-0.422579	5.69632e-16	TRUE
73	ENSG00000160191_PDE9A	-0.575789	0.178189	-0.422124	6.10158e-16	TRUE
74	ENSG00000160131_VMA21	-2.15433	0.177548	-0.421364	6.90547e-16	TRUE
75	ENSG00000180530_NRIP1	-2.05966	0.176146	-0.419698	9.19787e-16	TRUE
76	ENSG00000162909_CAPN2	18.7333	0.175815	0.419304	9.74276e-16	TRUE
77	ENSG00000109956_B3GAT1	8.05279	0.174506	0.417739	1.2722e-15	TRUE
78	ENSG00000105953_OGDH	13.5819	0.17416	0.417325	1.34129e-15	TRUE
79	ENSG00000205189_ZBTB10	-0.787761	0.174138	-0.417299	1.34129e-15	TRUE
80	ENSG00000110400_NECTIN1	2.72413	0.173295	0.416288	1.58545e-15	TRUE
81	ENSG00000162576_MXRA8	-0.705932	0.172891	-0.415802	1.7069e-15	TRUE
82	ENSG00000277586_NEFL	0.822713	0.172005	0.414735	2.03647e-15	TRUE
83	ENSG00000198682_PAPSS2	0.729242	0.171431	0.414042	2.27327e-15	TRUE
84	ENSG00000152256_PDK1	-3.08971	0.171267	-0.413844	2.32622e-15	TRUE
85	ENSG00000138439_FAM117B	-3.25583	0.170953	-0.413465	2.45735e-15	TRUE
86	ENSG00000182568_SATB1	-12.1425	0.170213	-0.412569	2.8426e-15	TRUE
87	ENSG00000158301_GPRASP2	-0.225283	0.169728	-0.41198	3.11543e-15	TRUE
88	ENSG00000178860_MSC	1.07285	0.168435	0.410409	4.05206e-15	TRUE
89	ENSG00000186020_ZNF529	-1.4409	0.167221	-0.408927	5.18271e-15	TRUE
90	ENSG00000132485_ZRANB2	-7.86328	0.166297	-0.407795	6.1736e-15	TRUE
91	ENSG00000204934_ATP6V0E2-AS1	-0.561288	0.16629	-0.407787	6.1736e-15	TRUE
92	ENSG00000146674_IGFBP3	0.989371	0.165507	0.406826	7.20565e-15	TRUE
93	ENSG00000158545_ZC3H18	5.65609	0.165454	0.406761	7.20857e-15	TRUE
94	ENSG00000196172_ZNF681	-0.426213	0.1645	-0.405586	8.72488e-15	TRUE
95	ENSG00000186197_EDARADD	0.545935	0.163669	0.40456	1.02897e-14	TRUE
96	ENSG00000168329_CX3CR1	39.3578	0.163559	0.404424	1.04209e-14	TRUE
97	ENSG00000026025_VIM	138.623	0.16259	0.403225	1.26508e-14	TRUE
98	ENSG00000136153_LMO7	-1.39898	0.16215	-0.402679	1.37049e-14	TRUE
99	ENSG00000007968_E2F2	1.32674	0.162114	0.402633	1.37049e-14	TRUE
100	ENSG00000181036_FCRL6	8.82493	0.162022	0.40252	1.38313e-14	TRUE
101	ENSG00000122378_PRXL2A	-0.465608	0.161674	-0.402087	1.47364e-14	TRUE
102	ENSG00000268205_ENSG00000268205	-1.6249	0.161053	-0.401314	1.66302e-14	TRUE
103	ENSG00000181847_TIGIT	5.16409	0.160856	0.401068	1.71656e-14	TRUE
104	ENSG00000134107_BHLHE40	9.73986	0.160501	0.400626	1.8156e-14	TRUE
105	ENSG00000290720_ZNF542P	-0.831914	0.160498	-0.400622	1.8156e-14	TRUE
106	ENSG00000226648_PLCG1-AS1	-0.24098	0.159482	-0.399352	2.22646e-14	TRUE
107	ENSG00000131368_MRPS25	-5.9997	0.158313	-0.397885	2.81932e-14	TRUE
108	ENSG00000256553_TRAV1-2	-0.961401	0.158178	-0.397716	2.87333e-14	TRUE
109	ENSG00000178537_SLC25A20	3.29275	0.157598	0.396986	3.21515e-14	TRUE
110	ENSG00000105329_TGFB1	47.9045	0.157487	0.396847	3.25176e-14	TRUE
111	ENSG00000138172_CALHM2	5.79558	0.157457	0.396809	3.25176e-14	TRUE
112	ENSG00000100450_GZMH	19.2392	0.157075	0.396327	3.49125e-14	TRUE
113	ENSG00000164284_GRPEL2	-1.31376	0.156569	-0.395688	3.84731e-14	TRUE
114	ENSG00000166582_CENPV	-0.63018	0.156416	-0.395495	3.93772e-14	TRUE
115	ENSG00000067057_PFKP	5.01577	0.156287	0.395332	4.00992e-14	TRUE
116	ENSG00000125864_BFSP1	0.491479	0.156038	0.395016	4.18834e-14	TRUE
117	ENSG00000205765_RIMOC1	-1.95945	0.155893	-0.394833	4.27014e-14	TRUE
118	ENSG00000196586_MYO6	1.24958	0.155864	0.394796	4.27014e-14	TRUE
119	ENSG00000141522_ARHGDIA	28.895	0.15553	0.394372	4.54102e-14	TRUE
120	ENSG00000169221_TBC1D10B	7.2363	0.15474	0.39337	5.31153e-14	TRUE
121	ENSG00000166816_LDHD	0.38017	0.154248	0.392744	5.8381e-14	TRUE
122	ENSG00000271503_CCL5	72.472	0.153955	0.392371	6.15535e-14	TRUE
123	ENSG00000101230_ISM1	0.37065	0.153714	0.392064	6.41991e-14	TRUE
124	ENSG00000109943_CRTAM	-1.26251	0.15276	-0.390845	7.7709e-14	TRUE
125	ENSG00000167476_JSRP1	3.07877	0.152705	0.390775	7.78996e-14	TRUE
126	ENSG00000172270_BSG	55.5721	0.152672	0.390732	7.78996e-14	TRUE
127	ENSG00000007047_MARK4	3.28513	0.152464	0.390466	8.01984e-14	TRUE
128	ENSG00000129422_MTUS1	-0.553696	0.152456	-0.390457	8.01984e-14	TRUE
129	ENSG00000005436_GCFC2	-0.808592	0.151477	-0.389201	9.75864e-14	TRUE
130	ENSG00000180644_PRF1	79.5903	0.151027	0.388621	1.06363e-13	TRUE
131	ENSG00000260997_ENSG00000260997	1.38836	0.150924	0.38849	1.07364e-13	TRUE
132	ENSG00000075234_TTC38	6.4694	0.150893	0.38845	1.07364e-13	TRUE
133	ENSG00000156475_PPP2R2B	1.49833	0.150849	0.388393	1.07364e-13	TRUE
134	ENSG00000099204_ABLIM1	-18.7285	0.150836	-0.388376	1.07364e-13	TRUE
135	ENSG00000197978_GOLGA6L9	-0.556387	0.150294	-0.387677	1.19297e-13	TRUE
136	ENSG00000117602_RCAN3	-9.6005	0.150025	-0.387331	1.25223e-13	TRUE
137	ENSG00000233184_DPH5-DT	-0.911421	0.149952	-0.387236	1.26221e-13	TRUE
138	ENSG00000178951_ZBTB7A	9.36423	0.149806	0.387048	1.29154e-13	TRUE
139	ENSG00000155659_VSIG4	0.80561	0.149729	0.386948	1.30309e-13	TRUE
140	ENSG00000177888_ZBTB41	-1.29167	0.149646	-0.386841	1.31627e-13	TRUE
141	ENSG00000141425_RPRD1A	-1.50459	0.149542	-0.386707	1.33535e-13	TRUE
142	ENSG00000246223_LINC01550	-0.827971	0.149289	-0.38638	1.39748e-13	TRUE
143	ENSG00000134987_WDR36	-1.80723	0.149167	-0.386221	1.42342e-13	TRUE
144	ENSG00000152969_JAKMIP1	2.01754	0.149099	0.386134	1.42414e-13	TRUE
145	ENSG00000186854_TRABD2A	-6.5108	0.149098	-0.386132	1.42414e-13	TRUE
146	ENSG00000087274_ADD1	16.9892	0.148951	0.385941	1.45826e-13	TRUE
147	ENSG00000087258_GNAO1	0.948507	0.148835	0.385791	1.48353e-13	TRUE
148	ENSG00000290689_ENSG00000290689	-0.865032	0.148621	-0.385514	1.53103e-13	TRUE
149	ENSG00000105409_ATP1A3	1.27937	0.148618	0.38551	1.53103e-13	TRUE
150	ENSG00000136111_TBC1D4	-4.79903	0.148529	-0.385395	1.54924e-13	TRUE
151	ENSG00000090674_MCOLN1	4.60448	0.148085	0.384818	1.67829e-13	TRUE
152	ENSG00000124193_SRSF6	-6.52186	0.14808	-0.384811	1.67829e-13	TRUE
153	ENSG00000164530_PI16	1.04567	0.147751	0.384384	1.77138e-13	TRUE
154	ENSG00000139722_VPS37B	5.84451	0.147729	0.384355	1.77138e-13	TRUE
155	ENSG00000146802_TMEM168	-1.8082	0.147725	-0.38435	1.77138e-13	TRUE
156	ENSG00000164442_CITED2	4.66171	0.147482	0.384034	1.85114e-13	TRUE
157	ENSG00000160219_GAB3	4.58265	0.147215	0.383686	1.94409e-13	TRUE
158	ENSG00000171368_TPPP	0.962511	0.146717	0.383037	2.14153e-13	TRUE
159	ENSG00000189319_FAM53B	17.2335	0.146629	0.382922	2.16748e-13	TRUE
160	ENSG00000060069_CTDP1	4.65244	0.14642	0.382648	2.23465e-13	TRUE
161	ENSG00000287958_ENSG00000287958	0.740339	0.146393	0.382614	2.23465e-13	TRUE
162	ENSG00000162746_FCRLB	0.328057	0.146366	0.382579	2.23465e-13	TRUE
163	ENSG00000137441_FGFBP2	19.6882	0.146362	0.382572	2.23465e-13	TRUE
164	ENSG00000186648_CARMIL3	0.498104	0.146292	0.382482	2.25322e-13	TRUE
165	ENSG00000131127_ZNF141	-1.6864	0.146191	-0.382349	2.28697e-13	TRUE
166	ENSG00000041880_PARP3	0.901004	0.146142	0.382285	2.29629e-13	TRUE
167	ENSG00000068394_GPKOW	1.51714	0.145955	0.382041	2.37275e-13	TRUE
168	ENSG00000160691_SHC1	4.86604	0.145875	0.381936	2.3978e-13	TRUE
169	ENSG00000104660_LEPROTL1	-5.63454	0.145696	-0.381702	2.47355e-13	TRUE
170	ENSG00000151135_TMEM263	-1.79207	0.145564	-0.381528	2.52744e-13	TRUE
171	ENSG00000141736_ERBB2	3.41778	0.145103	0.380924	2.75731e-13	TRUE
172	ENSG00000113319_RASGRF2	-2.08074	0.145087	-0.380902	2.75731e-13	TRUE
173	ENSG00000105323_HNRNPUL1	17.473	0.144586	0.380245	3.03679e-13	TRUE
174	ENSG00000060140_STYK1	0.287196	0.144564	0.380215	3.03679e-13	TRUE
175	ENSG00000170348_TMED10	-7.26215	0.144324	-0.3799	3.173e-13	TRUE
176	ENSG00000167664_TMIGD2	-1.71897	0.144208	-0.379748	3.23122e-13	TRUE
177	ENSG00000178163_ZNF518B	-1.64106	0.144122	-0.379634	3.27103e-13	TRUE
178	ENSG00000106868_SUSD1	3.00764	0.143798	0.379208	3.4773e-13	TRUE
179	ENSG00000196821_ILRUN	8.20285	0.143744	0.379136	3.49677e-13	TRUE
180	ENSG00000100003_SEC14L2	-0.2254	0.143022	-0.378183	4.03644e-13	TRUE
181	ENSG00000138442_WDR12	-0.690913	0.142665	-0.37771	4.32126e-13	TRUE
182	ENSG00000172915_NBEA	-0.41833	0.142205	-0.377101	4.72481e-13	TRUE
183	ENSG00000027869_SH2D2A	5.53822	0.142154	0.377033	4.74881e-13	TRUE
184	ENSG00000156162_DPY19L4	-0.846719	0.141995	-0.376822	4.88103e-13	TRUE
185	ENSG00000106327_TFR2	0.671331	0.141668	0.376388	5.19272e-13	TRUE
186	ENSG00000114120_SLC25A36	-2.7089	0.141437	-0.37608	5.395e-13	TRUE
187	ENSG00000275395_FCGBP	-3.98542	0.14143	-0.376072	5.395e-13	TRUE
188	ENSG00000139112_GABARAPL1	6.35699	0.141391	0.37602	5.40988e-13	TRUE
189	ENSG00000117394_SLC2A1	4.95999	0.141235	0.375812	5.55734e-13	TRUE
190	ENSG00000074590_NUAK1	0.709985	0.141158	0.37571	5.61613e-13	TRUE
191	ENSG00000159733_ZFYVE28	2.9037	0.141035	0.375547	5.72986e-13	TRUE
192	ENSG00000068354_TBC1D25	2.83613	0.140939	0.375418	5.81461e-13	TRUE
193	ENSG00000188001_TPRG1	0.38669	0.140568	0.374924	6.24309e-13	TRUE
194	ENSG00000079739_PGM1	2.21605	0.139672	0.373728	7.43848e-13	TRUE
195	ENSG00000257702_LBX2-AS1	0.508113	0.139667	0.37372	7.43848e-13	TRUE
196	ENSG00000189007_ADAT2	-0.921688	0.139237	-0.373145	8.0842e-13	TRUE
197	ENSG00000186462_NAP1L2	0.480018	0.139192	0.373085	8.11769e-13	TRUE
198	ENSG00000259623_ENSG00000259623	-0.761264	0.138996	-0.372822	8.40955e-13	TRUE
199	ENSG00000114631_PODXL2	-0.287708	0.138954	-0.372766	8.43906e-13	TRUE
200	ENSG00000136014_USP44	-0.339379	0.138357	-0.371964	9.4932e-13	TRUE
201	ENSG00000130940_CASZ1	1.59022	0.137963	0.371433	1.02385e-12	TRUE
202	ENSG00000236287_ZBED5	-3.22986	0.137941	-0.371404	1.02385e-12	TRUE
203	ENSG00000014216_CAPN1	14.8022	0.137686	0.371061	1.06574e-12	TRUE
204	ENSG00000287252_ENSG00000287252	-0.219387	0.137675	-0.371046	1.06574e-12	TRUE
205	ENSG00000164118_CEP44	-0.87323	0.137671	-0.37104	1.06574e-12	TRUE
206	ENSG00000135919_SERPINE2	-0.456468	0.13765	-0.371012	1.06574e-12	TRUE
207	ENSG00000165060_FXN	-0.623811	0.137544	-0.370869	1.081e-12	TRUE
208	ENSG00000135974_C2orf49	-1.43803	0.13753	-0.37085	1.081e-12	TRUE
209	ENSG00000197128_ZNF772	-0.589577	0.13751	-0.370824	1.081e-12	TRUE
210	ENSG00000185621_LMLN	-0.40271	0.136706	-0.369738	1.26876e-12	TRUE
211	ENSG00000165997_ARL5B	-1.66991	0.136683	-0.369706	1.26889e-12	TRUE
212	ENSG00000197275_RAD54B	-0.208937	0.136586	-0.369575	1.2882e-12	TRUE
213	ENSG00000198932_GPRASP1	-3.25216	0.135907	-0.368656	1.47349e-12	TRUE
214	ENSG00000070087_PFN2	-0.261407	0.135376	-0.367934	1.63529e-12	TRUE
215	ENSG00000135960_EDAR	-0.981711	0.135224	-0.367729	1.67891e-12	TRUE
216	ENSG00000242732_RTL5	0.902631	0.135029	0.367463	1.73925e-12	TRUE
217	ENSG00000137404_NRM	1.06533	0.134942	0.367345	1.76243e-12	TRUE
218	ENSG00000085415_SEH1L	-1.0571	0.134418	-0.366631	1.9529e-12	TRUE
219	ENSG00000261326_LINC01355	-0.323899	0.134377	-0.366575	1.96042e-12	TRUE
220	ENSG00000057935_MTA3	-0.98859	0.134018	-0.366085	2.10015e-12	TRUE
221	ENSG00000179604_CDC42EP4	1.05443	0.133971	0.366021	2.10419e-12	TRUE
222	ENSG00000141384_TAF4B	-0.714825	0.133964	-0.366012	2.10419e-12	TRUE
223	ENSG00000116001_TIA1	-5.36546	0.133887	-0.365906	2.12818e-12	TRUE
224	ENSG00000108773_KAT2A	-3.44344	0.133865	-0.365875	2.12834e-12	TRUE
225	ENSG00000118402_ELOVL4	-0.272551	0.13378	-0.365759	2.156e-12	TRUE
226	ENSG00000198252_STYX	-2.17734	0.133477	-0.365345	2.28367e-12	TRUE
227	ENSG00000139193_CD27	-8.0515	0.133018	-0.364716	2.49734e-12	TRUE
228	ENSG00000002834_LASP1	42.2878	0.132913	0.364572	2.54013e-12	TRUE
229	ENSG00000162630_B3GALT2	-0.33286	0.132347	-0.363795	2.83088e-12	TRUE
230	ENSG00000196975_ANXA4	2.51106	0.13232	0.363759	2.83088e-12	TRUE
231	ENSG00000197093_GAL3ST4	-1.29101	0.132318	-0.363756	2.83088e-12	TRUE
232	ENSG00000132386_SERPINF1	-0.805511	0.132237	-0.363643	2.86603e-12	TRUE
233	ENSG00000111860_CEP85L	-2.97685	0.132036	-0.363368	2.97297e-12	TRUE
234	ENSG00000166770_ZNF667-AS1	-0.386363	0.13189	-0.363167	3.04985e-12	TRUE
235	ENSG00000224078_SNHG14	-3.08314	0.131754	-0.362979	3.11453e-12	TRUE
236	ENSG00000197928_ZNF677	-0.574801	0.131745	-0.362967	3.11453e-12	TRUE
237	ENSG00000158195_WASF2	25.6877	0.131189	0.3622	3.47449e-12	TRUE
238	ENSG00000090061_CCNK	5.17258	0.131163	0.362164	3.47801e-12	TRUE
239	ENSG00000129128_SPCS3	-8.79667	0.131116	-0.3621	3.49658e-12	TRUE
240	ENSG00000149923_PPP4C	11.3268	0.130753	0.361598	3.74367e-12	TRUE
241	ENSG00000184481_FOXO4	11.9045	0.13074	0.361581	3.74367e-12	TRUE
242	ENSG00000110025_SNX15	1.87703	0.130683	0.361501	3.77204e-12	TRUE
243	ENSG00000171314_PGAM1	14.7641	0.130529	0.361287	3.87677e-12	TRUE
244	ENSG00000186106_ANKRD46	-0.734139	0.130485	-0.361228	3.8949e-12	TRUE
245	ENSG00000235194_PPP1R3E	-2.09137	0.130436	-0.361159	3.91836e-12	TRUE
246	ENSG00000140497_SCAMP2	7.62698	0.130275	0.360936	4.03285e-12	TRUE
247	ENSG00000116667_C1orf21	3.73876	0.130189	0.360818	4.08694e-12	TRUE
248	ENSG00000092820_EZR	15.1293	0.129893	0.360406	4.32399e-12	TRUE
249	ENSG00000099282_TSPAN15	-0.328812	0.129596	-0.359994	4.575e-12	TRUE
250	ENSG00000160211_G6PD	20.3064	0.129384	0.3597	4.75741e-12	TRUE
251	ENSG00000083312_TNPO1	-5.72846	0.128913	-0.359044	5.21554e-12	TRUE
252	ENSG00000102034_ELF4	13.3569	0.128735	0.358797	5.38583e-12	TRUE
253	ENSG00000174292_TNK1	-0.549162	0.128508	-0.35848	5.61883e-12	TRUE
254	ENSG00000132376_INPP5K	5.11915	0.128337	0.358241	5.7947e-12	TRUE
255	ENSG00000103064_SLC7A6	-7.64345	0.127989	-0.357755	6.19475e-12	TRUE
256	ENSG00000120915_EPHX2	-2.04599	0.127844	-0.357553	6.34527e-12	TRUE
257	ENSG00000110047_EHD1	33.1973	0.127832	0.357537	6.34527e-12	TRUE
258	ENSG00000203668_CHML	-0.913304	0.127762	-0.357438	6.41176e-12	TRUE
259	ENSG00000127995_CASD1	-1.37938	0.127693	-0.357341	6.47738e-12	TRUE
260	ENSG00000166333_ILK	8.81609	0.127564	0.357161	6.62345e-12	TRUE
261	ENSG00000145911_N4BP3	-1.55725	0.127529	-0.357112	6.6452e-12	TRUE
262	ENSG00000141867_BRD4	12.6678	0.127491	0.357059	6.65691e-12	TRUE
263	ENSG00000167461_RAB8A	8.71933	0.127483	0.357048	6.65691e-12	TRUE
264	ENSG00000175224_ATG13	4.65803	0.127417	0.356956	6.72062e-12	TRUE
265	ENSG00000143365_RORC	-2.06106	0.127345	-0.356855	6.78269e-12	TRUE
266	ENSG00000111737_RAB35	6.7208	0.127335	0.35684	6.78269e-12	TRUE
267	ENSG00000116604_MEF2D	7.93269	0.127256	0.35673	6.86631e-12	TRUE
268	ENSG00000129250_KIF1C	3.51656	0.127175	0.356616	6.93099e-12	TRUE
269	ENSG00000173530_TNFRSF10D	-0.593894	0.127173	-0.356614	6.93099e-12	TRUE
270	ENSG00000104419_NDRG1	9.1361	0.127107	0.35652	6.99643e-12	TRUE
271	ENSG00000176160_HSF5	-0.16789	0.127091	-0.356498	6.99643e-12	TRUE
272	ENSG00000177034_MTX3	-1.69141	0.126941	-0.356288	7.18566e-12	TRUE
273	ENSG00000172878_METAP1D	-0.489379	0.126747	-0.356015	7.44716e-12	TRUE
274	ENSG00000196950_SLC39A10	-1.99934	0.126602	-0.355812	7.64136e-12	TRUE
275	ENSG00000163738_MTHFD2L	-0.296766	0.126376	-0.355493	7.97182e-12	TRUE
276	ENSG00000181467_RAP2B	4.25648	0.126247	0.355313	8.15224e-12	TRUE
277	ENSG00000080546_SESN1	-2.57288	0.125839	-0.354738	8.82428e-12	TRUE
278	ENSG00000171649_ZIK1	-0.573116	0.125711	-0.354558	9.01494e-12	TRUE
279	ENSG00000180739_S1PR5	12.1796	0.125698	0.35454	9.01494e-12	TRUE
280	ENSG00000175548_ALG10B	-0.751167	0.125642	-0.35446	9.08676e-12	TRUE
281	ENSG00000076984_MAP2K7	4.20411	0.125622	0.354432	9.09079e-12	TRUE
282	ENSG00000025156_HSF2	-1.04322	0.125473	-0.354221	9.33644e-12	TRUE
283	ENSG00000268027_ENSG00000268027	-0.596136	0.125369	-0.354074	9.50198e-12	TRUE
284	ENSG00000095574_IKZF5	-2.03524	0.125316	-0.354	9.57067e-12	TRUE
285	ENSG00000166012_TAF1D	-2.96165	0.125238	-0.353889	9.68921e-12	TRUE
286	ENSG00000120699_EXOSC8	-1.81454	0.125215	-0.353858	9.69894e-12	TRUE
287	ENSG00000157216_SSBP3	6.3683	0.125061	0.35364	9.97209e-12	TRUE
288	ENSG00000189350_TOGARAM2	1.03092	0.124825	0.353305	1.04254e-11	TRUE
289	ENSG00000154358_OBSCN	-10.4259	0.12448	-0.352817	1.1121e-11	TRUE
290	ENSG00000105281_SLC1A5	4.91572	0.124457	0.352784	1.1121e-11	TRUE
291	ENSG00000104290_FZD3	-0.28082	0.124455	-0.352782	1.1121e-11	TRUE
292	ENSG00000166484_MAPK7	2.09523	0.124223	0.352453	1.1615e-11	TRUE
293	ENSG00000136286_MYO1G	27.5715	0.124049	0.352206	1.19918e-11	TRUE
294	ENSG00000112146_FBXO9	7.65309	0.123725	0.351746	1.27603e-11	TRUE
295	ENSG00000151131_NOPCHAP1	-0.466565	0.123579	-0.351538	1.30986e-11	TRUE
296	ENSG00000100100_PIK3IP1	-17.6533	0.123445	-0.351347	1.3415e-11	TRUE
297	ENSG00000100427_MLC1	3.58796	0.123184	0.350976	1.40541e-11	TRUE
298	ENSG00000136997_MYC	-5.83513	0.123181	-0.350972	1.40541e-11	TRUE
299	ENSG00000106397_PLOD3	2.04271	0.122844	0.350491	1.49967e-11	TRUE
300	ENSG00000069849_ATP1B3	3.50858	0.122654	0.35022	1.55307e-11	TRUE
301	ENSG00000165832_TRUB1	-0.710154	0.122628	-0.350184	1.556e-11	TRUE
