# Supplementary material for: Dynamic and reversible transcriptomic age shifts induced by COVID-19 in Korean whole blood
Source: Aging (Albany NY). 2025 Jun 10;17(6):1484–510. doi: 10.18632/aging.206270 (PMC12245201; doi:10.18632/aging.206270)
Supplement: Supplementary Table 4 [file aging-17-206270-s004.xlsx]

## Sheet: Supplementary Table 4
Supplementary Table 4. Summary table of Differentially Expressed Gene (DEG) results of 36 age predictors in COVID-19 patients.
phase	GeneID	baseMean	log2FoldChange	lfcSE	stat	pvalue	padj
Acute	ENSG00000163520_FBLN2	58.1569	-1.03865	0.153139	-6.78242	1.18177e-11	5.12881e-11
Acute	ENSG00000214279_SCART1	144.404	-0.971896	0.136912	-7.09867	1.25964e-12	5.82724e-12
Acute	ENSG00000173114_LRRN3	250.667	-0.823459	0.161778	-5.09005	3.57973e-07	1.12681e-06
Acute	ENSG00000186462_NAP1L2	67.9795	-0.806712	0.0911469	-8.85068	8.69846e-19	5.67518e-18
Acute	ENSG00000101230_ISM1	33.2349	-0.729519	0.140012	-5.21042	1.88409e-07	6.06732e-07
Acute	ENSG00000037280_FLT4	100.329	-0.723835	0.127625	-5.67157	1.41493e-08	4.94563e-08
Acute	ENSG00000197275_RAD54B	25.3449	-0.638978	0.109528	-5.83394	5.41332e-09	1.95253e-08
Acute	ENSG00000169918_OTUD7A	68.345	-0.578609	0.0921939	-6.276	3.47385e-10	1.36811e-09
Acute	ENSG00000196586_MYO6	104.484	-0.470516	0.126834	-3.70971	0.000207494	0.000504115
Acute	ENSG00000146674_IGFBP3	99.6094	-0.381293	0.112314	-3.3949	0.000686547	0.00156509
Acute	ENSG00000180530_NRIP1	347.738	-0.259328	0.0727828	-3.56304	0.00036658	0.000864141
Acute	ENSG00000150687_PRSS23	568.421	-0.238591	0.111011	-2.14925	0.0316149	0.0555926
Acute	ENSG00000174807_CD248	105.156	-0.210773	0.165845	-1.27091	0.203762	0.287527
Acute	ENSG00000170348_TMED10	2711.68	-0.163071	0.0310474	-5.25231	1.50204e-07	4.86937e-07
Acute	ENSG00000105409_ATP1A3	171.902	-0.0722215	0.0869911	-0.830217	0.406416	0.502735
Acute	ENSG00000164530_PI16	114.263	-0.0615903	0.102326	-0.601905	0.547237	0.629396
Acute	ENSG00000113721_PDGFRB	196.624	-0.029415	0.129473	-0.22719	0.820276	0.857549
Acute	ENSG00000256553_TRAV1-2	75.7128	-0.0175805	0.122343	-0.143698	0.885739	0.910535
Acute	ENSG00000085415_SEH1L	327.049	-0.00925299	0.0398756	-0.232047	0.816502	0.854538
Acute	ENSG00000106477_CEP41	131.174	0.0423211	0.0604234	0.700409	0.483672	0.574122
Acute	ENSG00000158292_GPR153	99.8483	0.0601117	0.112118	0.536148	0.591857	0.667897
Acute	ENSG00000185090_MANEAL	56.1751	0.0704116	0.0833052	0.845224	0.397986	0.494417
Acute	ENSG00000260997_ENSG00000260997	285.92	0.114197	0.0579661	1.97006	0.0488318	0.0824519
Acute	ENSG00000132386_SERPINF1	110.607	0.120756	0.0885262	1.36407	0.172546	0.249695
Acute	ENSG00000166471_TMEM41B	403.082	0.17982	0.0586315	3.06696	0.0021625	0.00460971
Acute	ENSG00000099282_TSPAN15	35.4428	0.26765	0.107325	2.49383	0.0126373	0.0239742
Acute	ENSG00000235823_OLMALINC	33.7499	0.283656	0.0930793	3.04747	0.00230778	0.00490136
Acute	ENSG00000076984_MAP2K7	1396.53	0.353906	0.0508175	6.96426	3.30137e-12	1.48717e-11
Acute	ENSG00000041880_PARP3	190.703	0.405652	0.0569863	7.11841	1.09175e-12	5.0758e-12
Acute	ENSG00000160191_PDE9A	47.9544	0.440484	0.126744	3.47537	0.000510148	0.0011824
Acute	ENSG00000134986_NREP	160.87	0.445772	0.062995	7.07632	1.48037e-12	6.8118e-12
Acute	ENSG00000166816_LDHD	31.4476	0.576517	0.124454	4.63236	3.61519e-06	1.04062e-05
Acute	ENSG00000114631_PODXL2	40.9965	0.592437	0.0878232	6.74578	1.52203e-11	6.55646e-11
Acute	ENSG00000112146_FBXO9	1732.28	0.801739	0.09103	8.80742	NA	NA
Acute	ENSG00000007968_E2F2	214.338	1.59391	0.0900544	17.6995	4.23416e-70	3.44203e-68
Acute	ENSG00000155659_VSIG4	115.313	2.51915	0.165931	15.1819	4.66168e-52	1.64353e-50
Mid	ENSG00000186462_NAP1L2	68.3417	-0.821769	0.0926146	-8.873	7.12001e-19	4.81518e-18
Mid	ENSG00000180530_NRIP1	338.845	-0.81234	0.0670183	-12.1212	8.15962e-34	1.17763e-32
Mid	ENSG00000163520_FBLN2	59.1962	-0.770788	0.151325	-5.09358	3.51364e-07	1.11095e-06
Mid	ENSG00000196586_MYO6	103.956	-0.683925	0.12886	-5.3075	1.11141e-07	3.65843e-07
Mid	ENSG00000214279_SCART1	147.473	-0.628391	0.140614	-4.46892	7.86146e-06	2.2089e-05
Mid	ENSG00000037280_FLT4	101.309	-0.627706	0.130401	-4.81365	1.48201e-06	4.45723e-06
Mid	ENSG00000173114_LRRN3	255.389	-0.531959	0.163508	-3.25342	0.00114025	0.00251572
Mid	ENSG00000169918_OTUD7A	69.0634	-0.4905	0.0940962	-5.21275	1.86059e-07	6.01951e-07
Mid	ENSG00000150687_PRSS23	563.601	-0.451343	0.113733	-3.96844	7.23461e-05	0.000183436
Mid	ENSG00000113721_PDGFRB	192.607	-0.379342	0.136226	-2.78466	0.00535836	0.0107527
Mid	ENSG00000197275_RAD54B	25.7923	-0.369027	0.107635	-3.4285	0.000606928	0.001385
Mid	ENSG00000101230_ISM1	34.216	-0.304199	0.138516	-2.19613	0.0280829	0.0495239
Mid	ENSG00000146674_IGFBP3	100.631	-0.299725	0.11278	-2.6576	0.00786996	0.0153745
Mid	ENSG00000256553_TRAV1-2	75.2966	-0.111195	0.123851	-0.897812	0.369286	0.464751
Mid	ENSG00000105409_ATP1A3	172.055	-0.0968658	0.0878794	-1.10226	0.270349	0.3624
Mid	ENSG00000158292_GPR153	98.9904	-0.0965341	0.115112	-0.838611	0.401688	0.49609
Mid	ENSG00000170348_TMED10	2738.89	-0.0733662	0.030059	-2.44074	0.0146571	0.0273206
Mid	ENSG00000174807_CD248	106.947	0.00217323	0.164517	0.0132098	0.98946	0.992034
Mid	ENSG00000164530_PI16	115.246	0.0232793	0.101517	0.229313	0.818626	0.85532
Mid	ENSG00000166471_TMEM41B	400.635	0.0735553	0.0558491	1.31703	0.187827	0.267122
Mid	ENSG00000106477_CEP41	132.201	0.0852356	0.060404	1.41109	0.158218	0.230611
Mid	ENSG00000132386_SERPINF1	111.021	0.117598	0.091327	1.28766	0.197864	0.279191
Mid	ENSG00000085415_SEH1L	331.669	0.123462	0.0370158	3.33539	0.000851789	0.00190783
Mid	ENSG00000185090_MANEAL	56.7038	0.129781	0.0813904	1.59454	0.110814	0.169339
Mid	ENSG00000041880_PARP3	187.4	0.202115	0.0559045	3.61537	0.000299921	0.000711309
Mid	ENSG00000260997_ENSG00000260997	289.456	0.220318	0.0584225	3.77112	0.000162519	0.000396294
Mid	ENSG00000235823_OLMALINC	34.0381	0.334841	0.0958283	3.49418	0.000475521	0.00110019
Mid	ENSG00000160191_PDE9A	47.4917	0.336121	0.128556	2.61459	0.00893346	0.0172761
Mid	ENSG00000134986_NREP	159.868	0.375285	0.0651903	5.75676	8.57454e-09	3.07797e-08
Mid	ENSG00000112146_FBXO9	1656.89	0.435057	0.0656512	6.62679	3.43074e-11	1.45708e-10
Mid	ENSG00000099282_TSPAN15	36.0191	0.44036	0.109999	4.00331	6.24628e-05	0.000159448
Mid	ENSG00000076984_MAP2K7	1412.31	0.484555	0.0440516	10.9997	3.83367e-28	4.19527e-27
Mid	ENSG00000166816_LDHD	31.2427	0.547039	0.128172	4.26801	1.97229e-05	5.32629e-05
Mid	ENSG00000114631_PODXL2	41.0755	0.683088	0.0878414	7.77638	7.46276e-15	4.0009e-14
Mid	ENSG00000007968_E2F2	191.206	1.03399	0.0787839	13.1244	2.38654e-39	4.55094e-38
Mid	ENSG00000155659_VSIG4	98.4811	2.00927	0.148353	13.5439	8.61276e-42	1.88618e-40
Late	ENSG00000214279_SCART1	144.566	-1.0171	0.145417	-6.9944	2.66392e-12	1.50266e-11
Late	ENSG00000037280_FLT4	99.495	-0.97986	0.135844	-7.2131	5.46914e-13	3.23784e-12
Late	ENSG00000163520_FBLN2	58.7885	-0.846215	0.158632	-5.33446	9.58294e-08	3.70196e-07
Late	ENSG00000180530_NRIP1	339.24	-0.702386	0.0663938	-10.5791	3.72592e-26	5.4158e-25
Late	ENSG00000173114_LRRN3	253.975	-0.555108	0.167687	-3.31038	0.000931699	0.00229196
Late	ENSG00000113721_PDGFRB	190.343	-0.529087	0.139518	-3.79226	0.000149281	0.000409683
Late	ENSG00000186462_NAP1L2	69.297	-0.454192	0.0917069	-4.95265	7.32094e-07	2.597e-06
Late	ENSG00000101230_ISM1	33.7751	-0.438852	0.144925	-3.02814	0.00246064	0.00565163
Late	ENSG00000196586_MYO6	105.195	-0.400608	0.132004	-3.03483	0.00240672	0.00553739
Late	ENSG00000169918_OTUD7A	69.1888	-0.388963	0.0950522	-4.0921	4.27491e-05	0.000125881
Late	ENSG00000197275_RAD54B	25.6905	-0.365488	0.111804	-3.26901	0.00107924	0.00262861
Late	ENSG00000105409_ATP1A3	168.568	-0.341293	0.0932652	-3.65939	0.000252818	0.000673424
Late	ENSG00000174807_CD248	103.931	-0.341285	0.173607	-1.96585	0.0493159	0.0867996
Late	ENSG00000164530_PI16	113.437	-0.118577	0.105376	-1.12527	0.260474	0.354705
Late	ENSG00000160191_PDE9A	45.5574	-0.101024	0.135413	-0.74604	0.455643	0.546911
Late	ENSG00000260997_ENSG00000260997	280.745	-0.0891596	0.0604433	-1.47509	0.140187	0.213412
Late	ENSG00000185090_MANEAL	55.4934	-0.0742392	0.0890059	-0.834092	0.404229	0.499025
Late	ENSG00000150687_PRSS23	573.626	-0.0727526	0.116514	-0.624412	0.532357	0.616483
Late	ENSG00000256553_TRAV1-2	75.1975	-0.0551658	0.130221	-0.423631	0.671835	0.736475
Late	ENSG00000132386_SERPINF1	108.925	-0.0211593	0.095639	-0.221241	0.824905	0.8633
Late	ENSG00000158292_GPR153	98.9949	-0.00834151	0.119029	-0.0700799	0.94413	0.957341
Late	ENSG00000146674_IGFBP3	102.073	0.00892864	0.11704	0.076287	0.939191	0.953625
Late	ENSG00000041880_PARP3	183.14	0.0111347	0.0578777	0.192383	0.847442	0.881211
Late	ENSG00000170348_TMED10	2736.12	0.0130577	0.0289457	0.451111	0.651909	0.71949
Late	ENSG00000106477_CEP41	130.721	0.0261787	0.0640637	0.408635	0.682808	0.745417
Late	ENSG00000099282_TSPAN15	34.8065	0.134189	0.117504	1.142	0.253456	0.347042
Late	ENSG00000085415_SEH1L	329.903	0.160811	0.0392831	4.09363	4.24669e-05	0.000125093
Late	ENSG00000235823_OLMALINC	33.4246	0.242756	0.100044	2.42648	0.0152461	0.0301522
Late	ENSG00000166471_TMEM41B	403.434	0.262583	0.0556449	4.7189	2.37122e-06	8.00248e-06
Late	ENSG00000166816_LDHD	30.2489	0.324314	0.132691	2.44414	0.01452	0.0288522
Late	ENSG00000134986_NREP	158.825	0.422715	0.0673223	6.27898	3.40809e-10	1.6313e-09
Late	ENSG00000076984_MAP2K7	1391.09	0.431435	0.0447779	9.63499	5.69e-22	6.25319e-21
Late	ENSG00000114631_PODXL2	39.7666	0.461007	0.0944571	4.8806	1.05766e-06	3.69328e-06
Late	ENSG00000155659_VSIG4	79.2907	0.915344	0.140593	6.51059	NA	NA
Late	ENSG00000007968_E2F2	186.837	0.955955	0.0889568	10.7463	6.17021e-27	9.39313e-26
Late	ENSG00000112146_FBXO9	1742.33	0.998715	0.07581	13.1739	1.23976e-39	4.22502e-38
(acute phase = blue; mid phase = orange; late phase = green; VSIG4 = bold character).
