# Supplementary material for: Dynamic and reversible transcriptomic age shifts induced by COVID-19 in Korean whole blood
Source: Aging (Albany NY). 2025 Jun 10;17(6):1484–510. doi: 10.18632/aging.206270 (PMC12245201; doi:10.18632/aging.206270)
Supplement: Supplementary Table 7 [file aging-17-206270-s006.xlsx]

## Sheet: Supplementary Table 6
Supplementary Table 7. Q30 and %GC of RNA-seq data from 901 samples used in analysis
SampleID	LaneID	Q30_Rate_After_Filtering	GC_Rate_After_Filtering	Group
C19-C035-V1	C19-C035-V1_L01	0.961023	0.610961	viral_v1_long
C19-C013-V2	C19-C013-V2_L01	0.955704	0.610289	viral_v2_long
C19-C016-V1	C19-C016-V1_L01	0.955849	0.609975	viral_v1_long
C19-C042-V1	C19-C042-V1_L01	0.94993	0.602028	viral_v1_long
C19-R075-V1	C19-R075-V1_L01	0.956047	0.601704	viral_recov
C19-R051-V1	C19-R051-V1_L01	0.958428	0.600072	viral_recov
C19-R087-V1	C19-R087-V1_L01	0.957703	0.599829	viral_recov
C19-C020-V2	C19-C020-V2_L01	0.955669	0.599514	viral_v2_long
C19-C042-V3	C19-C042-V3_L01	0.950317	0.595615	viral_v3_long
C19-C022-V1	C19-C022-V1_L01	0.963142	0.595516	viral_v1_long
C19-R073-V1	C19-R073-V1_L01	0.958224	0.594915	viral_recov
C19-R042-V1	C19-R042-V1_L01	0.96142	0.594262	viral_recov
C19-C012-V2	C19-C012-V2_L01	0.961655	0.594213	viral_v2_long
C19-C042-V2	C19-C042-V2_L01	0.951829	0.592722	viral_v2_long
C19-C032-V1	C19-C032-V1_L01	0.949419	0.5918	viral_v1_long
C19-R040-V1	C19-R040-V1_L01	0.960679	0.591715	viral_recov
C19-R077-V1	C19-R077-V1_L01	0.96264	0.591715	viral_recov
C19-C029-V3	C19-C029-V3_L01	0.951315	0.591364	viral_v3_long
C19-C026-V1	C19-C026-V1_L01	0.949278	0.591217	viral_v1_long
C19-R076-V1	C19-R076-V1_L01	0.959521	0.590526	viral_recov
C19-C034-V3	C19-C034-V3_L01	0.961866	0.590285	viral_v3_long
C19-R028-L1	C19-R028-L1_L01	0.949826	0.590237	viral_recov
C19-R080-V1	C19-R080-V1_L01	0.965065	0.589744	viral_recov
C19-R090-V1	C19-R090-V1_L01	0.956545	0.58974	viral_recov
C19-R078-L1	C19-R078-L1_L01	0.952575	0.589573	viral_recov
C19-C015-V1	C19-C015-V1_L01	0.943126	0.589383	viral_v1_long
C19-C023-V1	C19-C023-V1_L01	0.962812	0.589178	viral_v1_long
C19-R084-V1	C19-R084-V1_L01	0.958258	0.5891	viral_recov
C19-R033-V1	C19-R033-V1_L01	0.960287	0.588504	viral_recov
C19-R065-V1	C19-R065-V1_L01	0.964777	0.587396	viral_recov
C19-C005-V2	C19-C005-V2_L01	0.956711	0.586974	viral_v2_long
C19-C039-V3	C19-C039-V3_L01	0.964092	0.586777	viral_v3_long
KU10K-04250	KU10K-04250_L01	0.962859	0.586772	healthy_train
C19-C032-V3	C19-C032-V3_L01	0.948542	0.586636	viral_v3_long
C19-R029-V1	C19-R029-V1_L01	0.960416	0.586574	viral_recov
KU10K-01102	KU10K-01102_L01	0.964738	0.586072	healthy_train
C19-R125-V1	C19-R125-V1_L01	0.96557	0.584815	viral_recov
C19-R034-V1	C19-R034-V1_L01	0.96075	0.584628	viral_recov
C19-R026-V1	C19-R026-V1_L01	0.960819	0.584438	viral_recov
C19-R028-V1	C19-R028-V1_L01	0.961646	0.584397	viral_recov
C19-C035-V3	C19-C035-V3_L01	0.962523	0.584285	viral_v3_long
C19-C023-V2	C19-C023-V2_L01	0.966359	0.583859	viral_v2_long
C19-C004-V3	C19-C004-V3_L01	0.961694	0.583525	viral_v3_long
C19-C009-V2	C19-C009-V2_L01	0.956476	0.583313	viral_v2_long
C19-R097-V1	C19-R097-V1_L01	0.958545	0.583287	viral_recov
C19-R053-V1	C19-R053-V1_L01	0.958864	0.583048	viral_recov
C19-R069-V1	C19-R069-V1_L01	0.965191	0.582826	viral_recov
C19-C028-V2	C19-C028-V2_L01	0.949452	0.582732	viral_v2_long
C19-C018-V2	C19-C018-V2_L01	0.954912	0.58216	viral_v2_long
C19-R049-V1	C19-R049-V1_L01	0.961015	0.582119	viral_recov
C19-C005-V3	C19-C005-V3_L01	0.948422	0.581898	viral_v3_long
C19-R058-V1	C19-R058-V1_L01	0.961486	0.581697	viral_recov
C19-R025-V1	C19-R025-V1_L01	0.959593	0.581677	viral_recov
C19-R039-V1	C19-R039-V1_L01	0.95888	0.580927	viral_recov
KU10K-01347	KU10K-01347_L01	0.962703	0.580926	healthy_train
C19-R078-V1	C19-R078-V1_L01	0.947397	0.580265	viral_recov
C19-R074-V1	C19-R074-V1_L01	0.96261	0.58011	viral_recov
C19-C030-V3	C19-C030-V3_L01	0.946748	0.580014	viral_v3_long
C19-C024-V3	C19-C024-V3_L01	0.933458	0.579264	viral_v3_long
C19-R061-V1	C19-R061-V1_L01	0.962228	0.579205	viral_recov
C19-C030-V2	C19-C030-V2_L01	0.94906	0.57915	viral_v2_long
C19-R002-V1	C19-R002-V1_L01	0.95934	0.578639	viral_recov
C19-C010-V3	C19-C010-V3_L01	0.95373	0.578266	viral_v3_long
ST46	ST46_L01	0.957094	0.578076	depression
C19-C005-V1	C19-C005-V1_L01	0.960692	0.578028	viral_v1_long
KU10K-04016	KU10K-04016_L01	0.956374	0.578011	anxiety
C19-R010-V1	C19-R010-V1_L01	0.962384	0.57799	viral_recov
C19-R102-V1	C19-R102-V1_L01	0.958824	0.577975	viral_recov
KU10K-00873	KU10K-00873_L01	0.963344	0.577854	healthy_train
C19-R070-V1	C19-R070-V1_L01	0.96062	0.577833	viral_recov
C19-R147-V1	C19-R147-V1_L01	0.963997	0.577658	viral_recov
ST16	ST16_L01	0.971081	0.577616	depression
C19-R082-V1	C19-R082-V1_L01	0.96011	0.577488	viral_recov
C19-R129-V1	C19-R129-V1_L01	0.961119	0.577389	viral_recov
C19-R143-V1	C19-R143-V1_L01	0.963395	0.577008	viral_recov
KU10K-01092	KU10K-01092_L01	0.962399	0.576312	healthy_valid
C19-R136-V1	C19-R136-V1_L01	0.962406	0.576295	viral_recov
C19-R140-V1	C19-R140-V1_L01	0.963922	0.576011	viral_recov
C19-R027-V1	C19-R027-V1_L01	0.961867	0.575991	viral_recov
C19-R114-V1	C19-R114-V1_L01	0.965105	0.575979	viral_recov
C19-R089-V1	C19-R089-V1_L01	0.96137	0.575811	viral_recov
C19-R003-V1	C19-R003-V1_L01	0.959337	0.575405	viral_recov
C19-R088-V1	C19-R088-V1_L01	0.962488	0.575384	viral_recov
C19-C031-V2	C19-C031-V2_L01	0.945112	0.574848	viral_v2_long
C19-R062-V1	C19-R062-V1_L01	0.961297	0.574785	viral_recov
C19-C016-V2	C19-C016-V2_L01	0.960418	0.574634	viral_v2_long
KU10K-01244	KU10K-01244_L01	0.962764	0.574628	healthy_train
C19-R032-V1	C19-R032-V1_L01	0.958561	0.574622	viral_recov
C19-R015-V1	C19-R015-V1_L01	0.963239	0.57452	viral_recov
C19-R066-V1	C19-R066-V1_L01	0.963947	0.574428	viral_recov
KU10K-01186	KU10K-01186_L01	0.963854	0.574134	healthy_train
C19-R044-V1	C19-R044-V1_L01	0.949841	0.574096	viral_recov
KU10K-03771	KU10K-03771_L04	0.926437	0.574014	healthy_train
C19-R110-V1	C19-R110-V1_L01	0.962057	0.573964	viral_recov
ST12	ST12_L01	0.9478	0.57385	depression
KU10K-03781	KU10K-03781_L01	0.922592	0.573807	healthy_train
C19-C028-V3	C19-C028-V3_L01	0.952407	0.573307	viral_v3_long
C19-C017-V2	C19-C017-V2_L01	0.955407	0.573044	viral_v2_long
C19-R037-V1	C19-R037-V1_L01	0.96339	0.573033	viral_recov
C19-C029-V1	C19-C029-V1_L01	0.94938	0.572988	viral_v1_long
KU10K-01112	KU10K-01112_L01	0.96292	0.572934	healthy_train
C19-R047-V1	C19-R047-V1_L01	0.961483	0.572665	viral_recov
C19-R057-V1	C19-R057-V1_L01	0.964441	0.572158	viral_recov
C19-C011-V2	C19-C011-V2_L01	0.963479	0.571934	viral_v2_long
KU10K-04024	KU10K-04024_L01	0.954333	0.571894	anxiety
C19-R060-V1	C19-R060-V1_L01	0.961281	0.571875	viral_recov
C19-R055-V1	C19-R055-V1_L01	0.964457	0.571707	viral_recov
KU10K-03944	KU10K-03944_L01	0.934884	0.571614	healthy_train
C19-C018-V3	C19-C018-V3_L01	0.954351	0.571459	viral_v3_long
KU10K-02735	KU10K-02735_L01	0.95566	0.571423	healthy_train
KU10K-03781	KU10K-03781_L04	0.922187	0.571355	healthy_train
KU10K-01115	KU10K-01115_L01	0.963405	0.571158	healthy_train
C19-R099-V1	C19-R099-V1_L01	0.962383	0.571131	viral_recov
KU10K-03771	KU10K-03771_L01	0.922623	0.571124	healthy_train
C19-C025-V3	C19-C025-V3_L01	0.929204	0.571006	viral_v3_long
KU10K-03869	KU10K-03869_L02	0.923113	0.570953	healthy_train
KU10K-01038	KU10K-01038_L01	0.964635	0.570892	healthy_train
KU10K-00842	KU10K-00842_L01	0.961398	0.570824	healthy_train
C19-C037-V3	C19-C037-V3_L01	0.964663	0.570695	viral_v3_long
C19-R068-V1	C19-R068-V1_L01	0.963227	0.570644	viral_recov
KU10K-01040	KU10K-01040_L01	0.964204	0.570571	healthy_train
C19-R091-V1	C19-R091-V1_L01	0.961284	0.570487	viral_recov
KU10K-03869	KU10K-03869_L01	0.92575	0.570457	healthy_train
C19-C040-V1	C19-C040-V1_L01	0.964762	0.570377	viral_v1_long
C19-R124-V1	C19-R124-V1_L01	0.96229	0.570275	viral_recov
KU10K-00766	KU10K-00766_L01	0.964188	0.570251	healthy_train
C19-R095-V1	C19-R095-V1_L01	0.964763	0.570122	viral_recov
KU10K-03869	KU10K-03869_L03	0.924717	0.570076	healthy_train
KU10K-03781	KU10K-03781_L03	0.920426	0.56993	healthy_train
KU10K-01113	KU10K-01113_L01	0.963305	0.569922	healthy_train
C19-C008-V2	C19-C008-V2_L01	0.960466	0.569838	viral_v2_long
KU10K-03771	KU10K-03771_L02	0.9235	0.569823	healthy_train
C19-R030-V1	C19-R030-V1_L01	0.960006	0.569778	viral_recov
KU10K-00779	KU10K-00779_L01	0.972713	0.569718	healthy_train
C19-C028-V1	C19-C028-V1_L01	0.94709	0.569692	viral_v1_long
C19-C001-V2	C19-C001-V2_L01	0.958844	0.569352	viral_v2_long
KU10K-00836	KU10K-00836_L01	0.959417	0.569192	healthy_train
C19-R121-V1	C19-R121-V1_L01	0.967768	0.569126	viral_recov
C19-R086-V1	C19-R086-V1_L01	0.955825	0.569001	viral_recov
C19-C058-V2	C19-C058-V2_L01	0.951479	0.568905	viral_v2_long
C19-R111-V1	C19-R111-V1_L01	0.964614	0.568833	viral_recov
C19-R092-V1	C19-R092-V1_L01	0.950809	0.568702	viral_recov
KU10K-03518	KU10K-03518_L01	0.975991	0.56861	attempt
KU10K-03869	KU10K-03869_L04	0.921005	0.568597	healthy_train
KU10K-00862	KU10K-00862_L01	0.962924	0.568591	healthy_train
C19-R006-V1	C19-R006-V1_L01	0.965061	0.568531	viral_recov
C19-C048-V3	C19-C048-V3_L01	0.965372	0.568501	viral_v3_long
KU10K-02856	KU10K-02856_L01	0.952476	0.568476	healthy_valid
KU10K-03771	KU10K-03771_L03	0.926483	0.568375	healthy_train
KU10K-03781	KU10K-03781_L02	0.916744	0.568139	healthy_train
KU10K-03796	KU10K-03796_L01	0.91868	0.568009	healthy_valid
KU10K-03796	KU10K-03796_L03	0.916217	0.567986	healthy_valid
C19-C031-V3	C19-C031-V3_L01	0.951982	0.567741	viral_v3_long
C19-R007-V1	C19-R007-V1_L01	0.960258	0.567686	viral_recov
KU10K-03794	KU10K-03794_L04	0.909111	0.56765	healthy_train
C19-C057-V3	C19-C057-V3_L01	0.954679	0.567587	viral_v3_long
KU10K-01116	KU10K-01116_L01	0.961724	0.567555	healthy_train
KU10K-03764	KU10K-03764_L04	0.917857	0.567523	healthy_train
KU10K-03796	KU10K-03796_L02	0.913964	0.56749	healthy_valid
KU10K-03788	KU10K-03788_L01	0.923443	0.567436	healthy_train
KU10K-00348	KU10K-00348_L01	0.96869	0.567387	healthy_train
C19-R126-V1	C19-R126-V1_L01	0.964489	0.567337	viral_recov
KU10K-03796	KU10K-03796_L04	0.918829	0.56733	healthy_valid
KU10K-00892	KU10K-00892_L01	0.963521	0.567286	healthy_train
KU10K-01028	KU10K-01028_L01	0.963792	0.567251	healthy_train
C19-R001-L1	C19-R001-L1_L01	0.953102	0.567214	viral_recov
C19-C002-V3	C19-C002-V3_L01	0.959645	0.567192	viral_v3_long
KU10K-01096	KU10K-01096_L01	0.961256	0.567093	healthy_train
C19-C007-V3	C19-C007-V3_L01	0.962971	0.566964	viral_v3_long
ST17	ST17_L01	0.968148	0.566732	depression
KU10K-03878	KU10K-03878_L02	0.917944	0.566718	healthy_train
C19-C027-V2	C19-C027-V2_L01	0.951638	0.566639	viral_v2_long
C19-C037-V2	C19-C037-V2_L01	0.962142	0.566598	viral_v2_long
C19-C012-V3	C19-C012-V3_L01	0.960322	0.566558	viral_v3_long
C19-R012-V1	C19-R012-V1_L01	0.961938	0.566526	viral_recov
KU10K-03585	KU10K-03585_L01	0.956179	0.566495	healthy_train
C19-C009-V1	C19-C009-V1_L01	0.95918	0.566155	viral_v1_long
C19-R106-V1	C19-R106-V1_L01	0.964763	0.56602	viral_recov
KU10K-01104	KU10K-01104_L01	0.961562	0.566005	healthy_train
KU10K-03777	KU10K-03777_L01	0.923058	0.565946	healthy_train
C19-C039-V2	C19-C039-V2_L01	0.963605	0.565931	viral_v2_long
KU10K-01101	KU10K-01101_L01	0.962941	0.565906	healthy_valid
C19-R103-V1	C19-R103-V1_L01	0.962906	0.565753	viral_recov
KU10K-01052	KU10K-01052_L01	0.962798	0.565618	healthy_train
KU10K-03788	KU10K-03788_L04	0.921377	0.565606	healthy_train
KU10K-03764	KU10K-03764_L02	0.920301	0.565563	healthy_train
KU10K-03777	KU10K-03777_L02	0.919134	0.56555	healthy_train
C19-R092-L1	C19-R092-L1_L01	0.954721	0.565505	viral_recov
KU10K-04036	KU10K-04036_L01	0.95441	0.565395	anxiety
KU10K-03788	KU10K-03788_L03	0.920171	0.56531	healthy_train
KU10K-03878	KU10K-03878_L01	0.917108	0.565259	healthy_train
KU10K-03863	KU10K-03863_L01	0.916703	0.565165	healthy_train
C19-R085-V1	C19-R085-V1_L01	0.96092	0.565154	viral_recov
KU10K-04332	KU10K-04332_L01	0.95602	0.565104	healthy_train
KU10K-00431	KU10K-00431_L01	0.968974	0.565006	healthy_train
KU10K-03764	KU10K-03764_L01	0.916777	0.56497	healthy_train
C19-R030-L1	C19-R030-L1_L01	0.952307	0.564918	viral_recov
C19-R067-V1	C19-R067-V1_L01	0.963484	0.564851	viral_recov
KU10K-04873	KU10K-04873_L01	0.956857	0.56463	healthy_valid
KU10K-03878	KU10K-03878_L04	0.916916	0.564589	healthy_train
KU10K-03765	KU10K-03765_L03	0.92096	0.564497	healthy_valid
KU10K-03788	KU10K-03788_L02	0.919873	0.564415	healthy_train
KU10K-03863	KU10K-03863_L02	0.912671	0.564376	healthy_train
C19-C024-V2	C19-C024-V2_L01	0.936906	0.564345	viral_v2_long
KU10K-03878	KU10K-03878_L03	0.915184	0.564337	healthy_train
C19-R100-V1	C19-R100-V1_L01	0.961498	0.564288	viral_recov
C19-R022-V1	C19-R022-V1_L01	0.965537	0.564256	viral_recov
KU10K-03494	KU10K-03494_L01	0.962094	0.564249	attempt
C19-R041-V1	C19-R041-V1_L01	0.960464	0.564195	viral_recov
KU10K-03607	KU10K-03607_L01	0.971416	0.564136	healthy_train
KU10K-03794	KU10K-03794_L02	0.915014	0.564088	healthy_train
C19-R005-V1	C19-R005-V1_L01	0.962031	0.563912	viral_recov
C19-R117-V1	C19-R117-V1_L01	0.9643	0.563898	viral_recov
KU10K-03777	KU10K-03777_L03	0.918111	0.563772	healthy_train
KU10K-03863	KU10K-03863_L04	0.915416	0.563503	healthy_train
KU10K-03764	KU10K-03764_L03	0.916695	0.563417	healthy_train
C19-C034-V2	C19-C034-V2_L01	0.965616	0.563392	viral_v2_long
KU10K-03794	KU10K-03794_L03	0.910054	0.563318	healthy_train
KU10K-01348	KU10K-01348_L01	0.961244	0.563242	healthy_train
KU10K-03777	KU10K-03777_L04	0.920896	0.563083	healthy_train
KU10K-03794	KU10K-03794_L01	0.914347	0.563029	healthy_train
C19-R020-V1	C19-R020-V1_L01	0.965032	0.562911	viral_recov
KU10K-03863	KU10K-03863_L03	0.913811	0.562872	healthy_train
C19-C008-V3	C19-C008-V3_L01	0.961558	0.5627	viral_v3_long
KU10K-04039	KU10K-04039_L01	0.955971	0.562655	anxiety
KU10K-03496	KU10K-03496_L01	0.963493	0.562484	attempt
KU10K-00815	KU10K-00815_L01	0.961473	0.562373	healthy_train
KU10K-04037	KU10K-04037_L01	0.95532	0.562214	anxiety
C19-R118-V1	C19-R118-V1_L01	0.962714	0.562154	viral_recov
C19-R083-V1	C19-R083-V1_L01	0.964976	0.56213	viral_recov
KU10K-00588	KU10K-00588_L01	0.95618	0.562049	healthy_train
C19-R013-V1	C19-R013-V1_L01	0.961	0.561681	viral_recov
C19-C017-V3	C19-C017-V3_L01	0.96671	0.561651	viral_v3_long
C19-C038-V1	C19-C038-V1_L01	0.957486	0.561589	viral_v1_long
KU10K-04032	KU10K-04032_L01	0.953399	0.561503	anxiety
KU10K-01245	KU10K-01245_L01	0.960501	0.561211	healthy_train
KU10K-03765	KU10K-03765_L04	0.919715	0.561174	healthy_valid
C19-C025-V2	C19-C025-V2_L01	0.936883	0.561124	viral_v2_long
C19-R113-V1	C19-R113-V1_L01	0.962752	0.560979	viral_recov
KU10K-00370	KU10K-00370_L01	0.967674	0.560866	healthy_train
KU10K-03765	KU10K-03765_L01	0.920121	0.560799	healthy_valid
C19-C006-V1	C19-C006-V1_L01	0.966386	0.560725	viral_v1_long
C19-R142-V1	C19-R142-V1_L01	0.963607	0.560611	viral_recov
KU10K-03684	KU10K-03684_L01	0.947652	0.560378	healthy_train
KU10K-03809	KU10K-03809_L03	0.927298	0.560269	healthy_train
KU10K-03836	KU10K-03836_L01	0.923973	0.560162	healthy_train
C19-C036-V3	C19-C036-V3_L01	0.963632	0.560057	viral_v3_long
KU10K-00390	KU10K-00390_L01	0.96273	0.560022	healthy_valid
KU10K-03836	KU10K-03836_L04	0.924785	0.559632	healthy_train
KU10K-04010	KU10K-04010_L01	0.957751	0.559474	depression
KU10K-04034	KU10K-04034_L01	0.952928	0.559323	anxiety
KU10K-00281	KU10K-00281_L01	0.971127	0.559298	attempt
C19-R050-V1	C19-R050-V1_L01	0.956781	0.559232	viral_recov
C19-R137-V1	C19-R137-V1_L01	0.965812	0.559174	viral_recov
C19-C002-V2	C19-C002-V2_L01	0.960677	0.559131	viral_v2_long
KU10K-03836	KU10K-03836_L03	0.920483	0.559107	healthy_train
KU10K-03836	KU10K-03836_L02	0.919083	0.559022	healthy_train
KU10K-00262	KU10K-00262_L01	0.961472	0.558965	healthy_valid
KU10K-03765	KU10K-03765_L02	0.918138	0.558899	healthy_valid
KU10K-03780	KU10K-03780_L03	0.924964	0.558861	healthy_train
KU10K-01243	KU10K-01243_L01	0.961455	0.558837	healthy_valid
KU10K-03802	KU10K-03802_L04	0.907524	0.558827	healthy_train
KU10K-02793	KU10K-02793_L01	0.953153	0.558813	healthy_valid
C19-R094-V1	C19-R094-V1_L01	0.965517	0.558764	viral_recov
KU10K-03862	KU10K-03862_L04	0.922253	0.558656	healthy_train
C19-R008-V1	C19-R008-V1_L01	0.96031	0.558565	viral_recov
KU10K-01114	KU10K-01114_L01	0.961507	0.558453	healthy_train
C19-C013-V3	C19-C013-V3_L01	0.964845	0.558439	viral_v3_long
KU10K-04052	KU10K-04052_L01	0.957858	0.558359	anxiety
C19-C003-V3	C19-C003-V3_L01	0.961978	0.558099	viral_v3_long
AX74	AX74_L01	0.953299	0.55796	anxiety
C19-R134-V1	C19-R134-V1_L01	0.96166	0.557931	viral_recov
C19-R145-V1	C19-R145-V1_L01	0.962761	0.557856	viral_recov
C19-R059-V1	C19-R059-V1_L01	0.959119	0.557755	viral_recov
KU10K-04003	KU10K-04003_L01	0.958726	0.557665	depression
KU10K-04000	KU10K-04000_L01	0.958599	0.557651	depression
C19-C034-V1	C19-C034-V1_L01	0.963344	0.557549	viral_v1_long
C19-C057-V2	C19-C057-V2_L01	0.951941	0.557545	viral_v2_long
KU10K-00284	KU10K-00284_L01	0.961338	0.557451	healthy_train
C19-R081-V1	C19-R081-V1_L01	0.967967	0.557251	viral_recov
KU10K-03769	KU10K-03769_L01	0.917399	0.557218	healthy_train
C19-C001-V3	C19-C001-V3_L01	0.960269	0.557216	viral_v3_long
KU10K-03820	KU10K-03820_L01	0.927755	0.55703	healthy_train
KU10K-03815	KU10K-03815_L04	0.918312	0.556997	healthy_train
KU10K-01103	KU10K-01103_L01	0.96079	0.556951	healthy_train
KU10K-03820	KU10K-03820_L02	0.924772	0.556889	healthy_train
C19-R122-V1	C19-R122-V1_L01	0.962886	0.556833	viral_recov
C19-R132-V1	C19-R132-V1_L01	0.959122	0.556796	viral_recov
KU10K-04006	KU10K-04006_L01	0.958356	0.556776	depression
KU10K-03870	KU10K-03870_L03	0.926722	0.55649	healthy_train
KU10K-03809	KU10K-03809_L01	0.926631	0.556438	healthy_train
KU10K-03862	KU10K-03862_L02	0.92457	0.556427	healthy_train
KU10K-03873	KU10K-03873_L01	0.934768	0.556414	healthy_train
C19-R119-V1	C19-R119-V1_L01	0.964669	0.556401	viral_recov
KU10K-03787	KU10K-03787_L02	0.921221	0.556308	healthy_train
KU10K-03780	KU10K-03780_L01	0.923608	0.556233	healthy_train
C19-R023-V1	C19-R023-V1_L01	0.964867	0.556222	viral_recov
KU10K-03678	KU10K-03678_L01	0.972054	0.55608	healthy_train
KU10K-03780	KU10K-03780_L04	0.922773	0.556067	healthy_train
C19-C038-V3	C19-C038-V3_L01	0.967403	0.556061	viral_v3_long
KU10K-04014	KU10K-04014_L01	0.958658	0.555925	anxiety
KU10K-03809	KU10K-03809_L04	0.924914	0.555876	healthy_train
C19-C038-V2	C19-C038-V2_L01	0.967111	0.555813	viral_v2_long
C19-C027-V3	C19-C027-V3_L01	0.951495	0.555804	viral_v3_long
KU10K-03820	KU10K-03820_L04	0.926428	0.55575	healthy_train
KU10K-03841	KU10K-03841_L04	0.91863	0.555707	healthy_valid
KU10K-03820	KU10K-03820_L03	0.924768	0.555592	healthy_train
C19-R024-V1	C19-R024-V1_L01	0.963228	0.555547	viral_recov
KU10K-01027	KU10K-01027_L01	0.962496	0.555516	healthy_train
C19-R019-V1	C19-R019-V1_L01	0.960278	0.555368	viral_recov
KU10K-01474	KU10K-01474_L01	0.953724	0.555257	healthy_valid
C19-C044-V1	C19-C044-V1_L01	0.967261	0.555222	viral_v1_long
KU10K-01093	KU10K-01093_L01	0.960194	0.555196	healthy_train
KU10K-03774	KU10K-03774_L04	0.924233	0.555085	healthy_train
C19-R038-V1	C19-R038-V1_L01	0.962412	0.555025	viral_recov
C19-R071-V1	C19-R071-V1_L01	0.961669	0.55502	viral_recov
KU10K-03793	KU10K-03793_L02	0.914902	0.554999	healthy_train
C19-R101-V1	C19-R101-V1_L01	0.965291	0.554941	viral_recov
KU10K-03766	KU10K-03766_L01	0.923328	0.554939	healthy_train
KU10K-03769	KU10K-03769_L02	0.921798	0.554868	healthy_train
KU10K-03743	KU10K-03743_L01	0.966781	0.554867	healthy_train
KU10K-03827	KU10K-03827_L02	0.922266	0.554842	healthy_train
KU10K-03862	KU10K-03862_L01	0.921829	0.554835	healthy_train
KU10K-03800	KU10K-03800_L02	0.914207	0.554816	healthy_valid
C19-C058-V3	C19-C058-V3_L01	0.95328	0.554746	viral_v3_long
KU10K-01117	KU10K-01117_L01	0.962878	0.554644	healthy_train
KU10K-04045	KU10K-04045_L01	0.944305	0.554611	anxiety
KU10K-03793	KU10K-03793_L01	0.917011	0.554578	healthy_train
KU10K-03862	KU10K-03862_L03	0.921504	0.554532	healthy_train
KU10K-03787	KU10K-03787_L01	0.922428	0.554454	healthy_train
KU10K-03691	KU10K-03691_L01	0.965704	0.554441	healthy_train
KU10K-03793	KU10K-03793_L03	0.91905	0.554346	healthy_train
KU10K-03815	KU10K-03815_L01	0.915734	0.554335	healthy_train
KU10K-00455	KU10K-00455_L01	0.967017	0.554303	healthy_train
C19-C035-V2	C19-C035-V2_L01	0.958728	0.5543	viral_v2_long
KU10K-03787	KU10K-03787_L03	0.919775	0.554242	healthy_train
KU10K-03802	KU10K-03802_L03	0.912889	0.554157	healthy_train
KU10K-03786	KU10K-03786_L04	0.921496	0.554148	healthy_valid
KU10K-03802	KU10K-03802_L02	0.914009	0.554146	healthy_train
KU10K-03665	KU10K-03665_L01	0.966353	0.554081	healthy_train
KU10K-00073	KU10K-00073_L01	0.963727	0.554042	healthy_train
KU10K-03762	KU10K-03762_L03	0.920222	0.553954	healthy_train
KU10K-03841	KU10K-03841_L03	0.916884	0.553943	healthy_valid
KU10K-00156	KU10K-00156_L01	0.964247	0.55388	healthy_train
KU10K-03815	KU10K-03815_L03	0.918893	0.553802	healthy_train
KU10K-03870	KU10K-03870_L01	0.926286	0.55379	healthy_train
KU10K-03815	KU10K-03815_L02	0.915326	0.553762	healthy_train
C19-C015-V3	C19-C015-V3_L01	0.965376	0.553754	viral_v3_long
KU10K-03657	KU10K-03657_L01	0.955797	0.553753	healthy_valid
KU10K-03787	KU10K-03787_L04	0.920045	0.553644	healthy_train
KU10K-03780	KU10K-03780_L02	0.921665	0.553623	healthy_train
KU10K-00581	KU10K-00581_L01	0.955461	0.553552	healthy_train
C19-R109-V1	C19-R109-V1_L01	0.966404	0.553542	viral_recov
KU10K-01469	KU10K-01469_L01	0.954986	0.553536	healthy_valid
KU10K-03769	KU10K-03769_L04	0.916194	0.553521	healthy_train
C19-C033-V2	C19-C033-V2_L01	0.954806	0.553398	viral_v2_long
KU10K-03827	KU10K-03827_L01	0.921827	0.553385	healthy_train
KU10K-03809	KU10K-03809_L02	0.924094	0.55336	healthy_train
KU10K-00368	KU10K-00368_L01	0.96504	0.553294	healthy_train
KU10K-03814	KU10K-03814_L04	0.92161	0.553184	healthy_train
KU10K-04020	KU10K-04020_L01	0.955277	0.553133	anxiety
KU10K-03793	KU10K-03793_L04	0.915654	0.553125	healthy_train
KU10K-03800	KU10K-03800_L01	0.913797	0.553117	healthy_valid
KU10K-03866	KU10K-03866_L04	0.90601	0.553076	healthy_valid
KU10K-03870	KU10K-03870_L04	0.924916	0.553074	healthy_train
KU10K-03625	KU10K-03625_L01	0.975774	0.553068	healthy_train
KU10K-00777	KU10K-00777_L01	0.971618	0.553043	healthy_train
KU10K-03802	KU10K-03802_L01	0.912294	0.552996	healthy_train
KU10K-03841	KU10K-03841_L02	0.91641	0.552983	healthy_valid
KU10K-03774	KU10K-03774_L03	0.922149	0.552893	healthy_train
KU10K-03800	KU10K-03800_L03	0.911169	0.552783	healthy_valid
KU10K-03774	KU10K-03774_L02	0.91984	0.552766	healthy_train
KU10K-03814	KU10K-03814_L02	0.919755	0.552764	healthy_train
KU10K-03866	KU10K-03866_L02	0.907417	0.552738	healthy_valid
KU10K-00201	KU10K-00201_L01	0.96706	0.552723	healthy_train
C19-C048-V1	C19-C048-V1_L01	0.966053	0.552711	viral_v1_long
KU10K-03789	KU10K-03789_L04	0.923001	0.552664	healthy_train
C19-R031-V1	C19-R031-V1_L01	0.957411	0.552607	viral_recov
KU10K-03841	KU10K-03841_L01	0.914192	0.552562	healthy_valid
KU10K-03795	KU10K-03795_L03	0.903218	0.552478	healthy_train
KU10K-03827	KU10K-03827_L03	0.92009	0.552473	healthy_train
KU10K-03769	KU10K-03769_L03	0.916466	0.552399	healthy_train
KU10K-03766	KU10K-03766_L04	0.923228	0.552364	healthy_train
C19-C041-V3	C19-C041-V3_L01	0.964729	0.552139	viral_v3_long
KU10K-03800	KU10K-03800_L04	0.913504	0.552133	healthy_valid
C19-C058-V1	C19-C058-V1_L01	0.956754	0.552123	viral_v1_long
KU10K-03870	KU10K-03870_L02	0.924176	0.551949	healthy_train
KU10K-03814	KU10K-03814_L01	0.919138	0.551911	healthy_train
KU10K-00380	KU10K-00380_L01	0.963097	0.551866	healthy_train
KU10K-03827	KU10K-03827_L04	0.921537	0.55186	healthy_train
KU10K-03664	KU10K-03664_L01	0.97147	0.551769	healthy_train
KU10K-00587	KU10K-00587_L01	0.954154	0.551726	healthy_train
KU10K-03825	KU10K-03825_L01	0.922453	0.551693	healthy_train
KU10K-03824	KU10K-03824_L04	0.919034	0.551688	healthy_train
KU10K-03797	KU10K-03797_L02	0.908994	0.551631	healthy_valid
C19-R052-V1	C19-R052-V1_L01	0.963762	0.551623	viral_recov
KU10K-04055	KU10K-04055_L01	0.960499	0.551621	anxiety
ST41	ST41_L01	0.955677	0.551616	depression
KU10K-03789	KU10K-03789_L02	0.918429	0.551614	healthy_train
KU10K-03501	KU10K-03501_L01	0.96472	0.551467	attempt
KU10K-03817	KU10K-03817_L01	0.925845	0.551463	healthy_valid
KU10K-01105	KU10K-01105_L01	0.960014	0.551461	healthy_train
KU10K-03775	KU10K-03775_L04	0.917375	0.551433	healthy_train
C19-C044-V3	C19-C044-V3_L01	0.966848	0.551376	viral_v3_long
KU10K-03774	KU10K-03774_L01	0.917926	0.551334	healthy_train
KU10K-03713	KU10K-03713_L01	0.961468	0.551322	healthy_train
KU10K-04065	KU10K-04065_L01	0.954129	0.551293	anxiety
KU10K-03824	KU10K-03824_L01	0.920165	0.551263	healthy_train
KU10K-03783	KU10K-03783_L04	0.91586	0.55126	healthy_train
KU10K-00471	KU10K-00471_L01	0.965358	0.551232	healthy_train
KU10K-03866	KU10K-03866_L01	0.906828	0.551224	healthy_valid
KU10K-03865	KU10K-03865_L01	0.940197	0.551162	healthy_train
C19-R107-V1	C19-R107-V1_L01	0.964797	0.551131	viral_recov
KU10K-04004	KU10K-04004_L01	0.958953	0.551092	depression
KU10K-03762	KU10K-03762_L01	0.918925	0.551042	healthy_train
KU10K-03786	KU10K-03786_L03	0.920318	0.551031	healthy_valid
KU10K-03622	KU10K-03622_L01	0.976656	0.551024	healthy_train
KU10K-03824	KU10K-03824_L02	0.921095	0.551023	healthy_train
KU10K-03786	KU10K-03786_L01	0.91747	0.551021	healthy_valid
KU10K-03882	KU10K-03882_L03	0.918495	0.550999	healthy_train
KU10K-03668	KU10K-03668_L01	0.966351	0.550997	healthy_train
KU10K-03775	KU10K-03775_L01	0.918992	0.550986	healthy_train
KU10K-03783	KU10K-03783_L02	0.920649	0.550958	healthy_train
KU10K-04958	KU10K-04958_L01	0.952457	0.550942	healthy_valid
KU10K-03776	KU10K-03776_L01	0.917439	0.550885	healthy_valid
KU10K-03773	KU10K-03773_L01	0.925006	0.550858	healthy_valid
KU10K-03762	KU10K-03762_L04	0.924567	0.55072	healthy_train
C19-C001-V1	C19-C001-V1_L01	0.96893	0.550691	viral_v1_long
KU10K-00418	KU10K-00418_L01	0.968798	0.550652	healthy_train
KU10K-03776	KU10K-03776_L02	0.921401	0.550633	healthy_valid
KU10K-03786	KU10K-03786_L02	0.91821	0.550549	healthy_valid
KU10K-04043	KU10K-04043_L01	0.954697	0.550442	anxiety
C19-C018-V1	C19-C018-V1_L01	0.961632	0.550439	viral_v1_long
C19-C037-V1	C19-C037-V1_L01	0.963434	0.550368	viral_v1_long
KU10K-00424	KU10K-00424_L01	0.968418	0.55033	healthy_train
KU10K-03797	KU10K-03797_L01	0.915092	0.550269	healthy_valid
KU10K-03789	KU10K-03789_L03	0.921111	0.550256	healthy_train
KU10K-00481	KU10K-00481_L01	0.965726	0.550207	healthy_train
KU10K-03783	KU10K-03783_L01	0.918986	0.550146	healthy_train
KU10K-00816	KU10K-00816_L01	0.960749	0.550137	healthy_train
KU10K-03747	KU10K-03747_L01	0.95908	0.550061	healthy_train
KU10K-00514	KU10K-00514_L01	0.96787	0.550058	healthy_train
KU10K-01026	KU10K-01026_L01	0.962788	0.550048	healthy_train
KU10K-03814	KU10K-03814_L03	0.921083	0.550041	healthy_train
KU10K-03662	KU10K-03662_L01	0.972806	0.55002	healthy_train
KU10K-03850	KU10K-03850_L04	0.92495	0.550018	healthy_valid
C19-R024-L1	C19-R024-L1_L01	0.954405	0.549956	viral_recov
KU10K-04007	KU10K-04007_L01	0.957814	0.549898	depression
KU10K-03789	KU10K-03789_L01	0.917518	0.54976	healthy_train
KU10K-03817	KU10K-03817_L04	0.924202	0.549757	healthy_valid
KU10K-03810	KU10K-03810_L01	0.923978	0.549744	healthy_valid
KU10K-03817	KU10K-03817_L03	0.923319	0.549701	healthy_valid
KU10K-03866	KU10K-03866_L03	0.910248	0.54969	healthy_valid
C19-C032-V2	C19-C032-V2_L01	0.950178	0.549689	viral_v2_long
KU10K-03783	KU10K-03783_L03	0.919903	0.549687	healthy_train
KU10K-00042	KU10K-00042_L01	0.966172	0.549616	healthy_train
KU10K-03797	KU10K-03797_L04	0.912102	0.549587	healthy_valid
KU10K-03817	KU10K-03817_L02	0.922903	0.549498	healthy_valid
KU10K-00336	KU10K-00336_L01	0.967767	0.549474	healthy_train
KU10K-03840	KU10K-03840_L01	0.921727	0.54941	healthy_train
KU10K-00560	KU10K-00560_L01	0.957902	0.54936	healthy_train
KU10K-00518	KU10K-00518_L01	0.967226	0.549326	healthy_train
KU10K-03824	KU10K-03824_L03	0.921141	0.549224	healthy_train
KU10K-03775	KU10K-03775_L02	0.921449	0.549172	healthy_train
KU10K-00288	KU10K-00288_L01	0.966666	0.549148	healthy_valid
C19-C030-V1	C19-C030-V1_L01	0.951962	0.549132	viral_v1_long
KU10K-00569	KU10K-00569_L01	0.95894	0.549107	healthy_train
KU10K-00578	KU10K-00578_L01	0.969904	0.549101	attempt
C19-C023-V3	C19-C023-V3_L01	0.959677	0.548992	viral_v3_long
KU10K-03762	KU10K-03762_L02	0.920937	0.548965	healthy_train
KU10K-03776	KU10K-03776_L03	0.922059	0.548952	healthy_valid
KU10K-03825	KU10K-03825_L02	0.922993	0.548944	healthy_train
C19-C033-V3	C19-C033-V3_L01	0.951494	0.548943	viral_v3_long
C19-R004-V1	C19-R004-V1_L01	0.962687	0.548939	viral_recov
KU10K-03766	KU10K-03766_L03	0.921775	0.548918	healthy_train
KU10K-00343	KU10K-00343_L01	0.967753	0.548883	healthy_train
KU10K-03715	KU10K-03715_L01	0.964389	0.548815	healthy_train
KU10K-03948	KU10K-03948_L01	0.912311	0.548677	healthy_valid
KU10K-03877	KU10K-03877_L01	0.939609	0.548621	healthy_train
KU10K-03763	KU10K-03763_L01	0.917871	0.548577	healthy_train
KU10K-03797	KU10K-03797_L03	0.915421	0.548576	healthy_valid
KU10K-03850	KU10K-03850_L03	0.923175	0.548552	healthy_valid
KU10K-03773	KU10K-03773_L03	0.921494	0.548378	healthy_valid
KU10K-01424	KU10K-01424_L01	0.95114	0.548368	healthy_train
KU10K-03801	KU10K-03801_L04	0.905132	0.548303	healthy_train
KU10K-00694	KU10K-00694_L01	0.949717	0.5483	healthy_valid
C19-C004-V2	C19-C004-V2_L01	0.958569	0.548189	viral_v2_long
C19-R054-V1	C19-R054-V1_L01	0.963537	0.548031	viral_recov
KU10K-03690	KU10K-03690_L01	0.971745	0.547988	healthy_train
KU10K-03687	KU10K-03687_L01	0.96716	0.547885	healthy_train
KU10K-03795	KU10K-03795_L04	0.904119	0.547854	healthy_train
KU10K-03775	KU10K-03775_L03	0.922163	0.547831	healthy_train
KU10K-04046	KU10K-04046_L01	0.943665	0.547777	anxiety
C19-C029-V2	C19-C029-V2_L01	0.94593	0.54775	viral_v2_long
KU10K-03850	KU10K-03850_L02	0.922675	0.547711	healthy_valid
KU10K-03763	KU10K-03763_L02	0.91583	0.547662	healthy_train
C19-R135-V1	C19-R135-V1_L01	0.965267	0.547599	viral_recov
KU10K-03773	KU10K-03773_L04	0.922337	0.547509	healthy_valid
KU10K-00857	KU10K-00857_L01	0.961228	0.547487	healthy_train
KU10K-03850	KU10K-03850_L01	0.920571	0.547388	healthy_valid
KU10K-03663	KU10K-03663_L01	0.965785	0.547364	healthy_train
KU10K-00351	KU10K-00351_L01	0.964457	0.54726	healthy_valid
KU10K-03871	KU10K-03871_L04	0.922941	0.54715	healthy_train
KU10K-03785	KU10K-03785_L04	0.919991	0.547119	healthy_train
KU10K-03948	KU10K-03948_L03	0.909561	0.547105	healthy_valid
KU10K-03840	KU10K-03840_L03	0.919278	0.547096	healthy_train
KU10K-03845	KU10K-03845_L01	0.925077	0.547063	healthy_valid
C19-C059-V3	C19-C059-V3_L01	0.955475	0.547057	viral_v3_long
KU10K-00379	KU10K-00379_L01	0.960251	0.547013	healthy_train
KU10K-03825	KU10K-03825_L04	0.921554	0.547005	healthy_train
KU10K-03785	KU10K-03785_L02	0.920696	0.546855	healthy_train
C19-C044-V2	C19-C044-V2_L01	0.968704	0.546849	viral_v2_long
KU10K-03810	KU10K-03810_L04	0.923357	0.54681	healthy_valid
KU10K-01025	KU10K-01025_L01	0.962447	0.546808	healthy_train
KU10K-00493	KU10K-00493_L01	0.964639	0.546803	healthy_train
KU10K-00504	KU10K-00504_L01	0.96017	0.546803	healthy_train
KU10K-04064	KU10K-04064_L01	0.962305	0.5468	anxiety
KU10K-03810	KU10K-03810_L03	0.921557	0.546773	healthy_valid
KU10K-03766	KU10K-03766_L02	0.917375	0.546649	healthy_train
C19-R141-V1	C19-R141-V1_L01	0.965918	0.546589	viral_recov
KU10K-03848	KU10K-03848_L04	0.916871	0.546569	healthy_valid
C19-R144-V1	C19-R144-V1_L01	0.959627	0.54653	viral_recov
KU10K-03670	KU10K-03670_L01	0.96742	0.546377	healthy_train
KU10K-03948	KU10K-03948_L04	0.91038	0.546275	healthy_valid
KU10K-03831	KU10K-03831_L01	0.919254	0.546265	healthy_valid
KU10K-03773	KU10K-03773_L02	0.921031	0.546258	healthy_valid
KU10K-03825	KU10K-03825_L03	0.921686	0.546168	healthy_train
KU10K-03826	KU10K-03826_L04	0.920003	0.546077	healthy_valid
KU10K-03840	KU10K-03840_L04	0.919793	0.546076	healthy_train
KU10K-00434	KU10K-00434_L01	0.965104	0.545984	healthy_train
KU10K-03565	KU10K-03565_L01	0.976992	0.545922	depression
KU10K-03801	KU10K-03801_L01	0.918078	0.54592	healthy_train
C19-C043-V3	C19-C043-V3_L01	0.949914	0.545919	viral_v3_long
KU10K-03763	KU10K-03763_L03	0.918877	0.545896	healthy_train
KU10K-00797	KU10K-00797_L01	0.965779	0.545896	healthy_train
C19-C022-V2	C19-C022-V2_L01	0.964817	0.54588	viral_v2_long
KU10K-00374	KU10K-00374_L01	0.961328	0.54583	healthy_valid
KU10K-03779	KU10K-03779_L01	0.923521	0.545695	healthy_train
KU10K-03776	KU10K-03776_L04	0.919019	0.545687	healthy_valid
KU10K-03948	KU10K-03948_L02	0.909586	0.545664	healthy_valid
KU10K-03779	KU10K-03779_L02	0.920949	0.545587	healthy_train
KU10K-00538	KU10K-00538_L01	0.967543	0.545572	healthy_train
KU10K-03826	KU10K-03826_L02	0.918672	0.545549	healthy_valid
KU10K-04021	KU10K-04021_L01	0.954825	0.545534	anxiety
KU10K-03848	KU10K-03848_L02	0.915931	0.545497	healthy_valid
KU10K-03813	KU10K-03813_L01	0.921994	0.545376	healthy_train
C19-R127-V1	C19-R127-V1_L01	0.961985	0.545358	viral_recov
KU10K-00503	KU10K-00503_L01	0.965172	0.545351	healthy_train
KU10K-01407	KU10K-01407_L01	0.956174	0.545336	healthy_train
KU10K-00422	KU10K-00422_L01	0.968523	0.545322	healthy_train
KU10K-03629	KU10K-03629_L01	0.972013	0.545311	healthy_train
KU10K-03592	KU10K-03592_L01	0.970905	0.545269	healthy_train
KU10K-03682	KU10K-03682_L01	0.968643	0.545245	healthy_valid
KU10K-00487	KU10K-00487_L01	0.964315	0.545154	healthy_train
KU10K-03673	KU10K-03673_L01	0.973673	0.545121	healthy_train
KU10K-03831	KU10K-03831_L02	0.920426	0.545111	healthy_valid
KU10K-03840	KU10K-03840_L02	0.918351	0.545087	healthy_train
KU10K-03785	KU10K-03785_L01	0.918049	0.545052	healthy_train
KU10K-03882	KU10K-03882_L04	0.916731	0.545035	healthy_train
KU10K-03831	KU10K-03831_L03	0.922663	0.545035	healthy_valid
KU10K-03756	KU10K-03756_L01	0.963948	0.545023	healthy_valid
KU10K-03842	KU10K-03842_L01	0.91757	0.545018	healthy_train
KU10K-03845	KU10K-03845_L04	0.925217	0.544964	healthy_valid
KU10K-03871	KU10K-03871_L01	0.921147	0.544909	healthy_train
KU10K-03677	KU10K-03677_L01	0.945706	0.544884	healthy_train
C19-R104-V1	C19-R104-V1_L01	0.964129	0.544873	viral_recov
KU10K-00868	KU10K-00868_L01	0.968466	0.544802	healthy_train
KU10K-00342	KU10K-00342_L01	0.965899	0.544694	healthy_train
C19-R105-V1	C19-R105-V1_L01	0.963899	0.544645	viral_recov
KU10K-03882	KU10K-03882_L01	0.918103	0.544641	healthy_train
KU10K-03737	KU10K-03737_L01	0.962057	0.544554	healthy_train
KU10K-03801	KU10K-03801_L03	0.915622	0.544532	healthy_train
KU10K-03854	KU10K-03854_L03	0.924021	0.544528	healthy_train
KU10K-03623	KU10K-03623_L01	0.974545	0.544528	healthy_train
KU10K-03803	KU10K-03803_L01	0.901449	0.544518	healthy_train
KU10K-03826	KU10K-03826_L01	0.918002	0.544511	healthy_valid
KU10K-01466	KU10K-01466_L01	0.95016	0.544477	healthy_train
KU10K-00482	KU10K-00482_L01	0.963505	0.544472	healthy_train
KU10K-03816	KU10K-03816_L02	0.924531	0.544415	healthy_valid
C19-C057-V1	C19-C057-V1_L01	0.95358	0.54434	viral_v1_long
KU10K-03587	KU10K-03587_L01	0.96168	0.544262	healthy_valid
KU10K-03779	KU10K-03779_L03	0.923728	0.544251	healthy_train
KU10K-01446	KU10K-01446_L01	0.955945	0.544245	healthy_valid
KU10K-03667	KU10K-03667_L01	0.966863	0.544234	healthy_train
KU10K-03842	KU10K-03842_L04	0.914994	0.544187	healthy_train
KU10K-03801	KU10K-03801_L02	0.915736	0.544106	healthy_train
KU10K-03848	KU10K-03848_L01	0.914631	0.544073	healthy_valid
KU10K-03782	KU10K-03782_L01	0.921547	0.544048	healthy_train
KU10K-04047	KU10K-04047_L01	0.946045	0.544028	anxiety
KU10K-03871	KU10K-03871_L02	0.92091	0.54401	healthy_train
KU10K-00414	KU10K-00414_L01	0.967481	0.5439	healthy_valid
KU10K-03810	KU10K-03810_L02	0.918762	0.543898	healthy_valid
KU10K-00617	KU10K-00617_L01	0.965832	0.54387	healthy_train
KU10K-00436	KU10K-00436_L01	0.965201	0.543845	healthy_valid
KU10K-03871	KU10K-03871_L03	0.924215	0.543843	healthy_train
KU10K-03795	KU10K-03795_L01	0.916834	0.543797	healthy_train
KU10K-01401	KU10K-01401_L01	0.955452	0.543669	healthy_valid
KU10K-03785	KU10K-03785_L03	0.921659	0.543668	healthy_train
KU10K-01447	KU10K-01447_L01	0.954921	0.54359	healthy_train
KU10K-03782	KU10K-03782_L04	0.92215	0.543589	healthy_train
KU10K-00499	KU10K-00499_L01	0.966425	0.543575	healthy_valid
KU10K-03883	KU10K-03883_L02	0.921021	0.543522	healthy_train
KU10K-03686	KU10K-03686_L01	0.947136	0.543494	healthy_train
KU10K-05210	KU10K-05210_L01	0.950408	0.543488	healthy_train
KU10K-03816	KU10K-03816_L01	0.923589	0.54344	healthy_valid
KU10K-03528	KU10K-03528_L01	0.979284	0.54341	attempt
KU10K-00245	KU10K-00245_L01	0.970809	0.543386	attempt
KU10K-03763	KU10K-03763_L04	0.913376	0.543297	healthy_train
KU10K-04022	KU10K-04022_L01	0.951268	0.543215	anxiety
KU10K-03883	KU10K-03883_L04	0.919186	0.5432	healthy_train
KU10K-03712	KU10K-03712_L01	0.960227	0.543175	healthy_train
KU10K-03545	KU10K-03545_L01	0.950056	0.543163	depression
KU10K-03883	KU10K-03883_L01	0.920102	0.542975	healthy_train
C19-R128-V1	C19-R128-V1_L01	0.963808	0.542958	viral_recov
KU10K-03842	KU10K-03842_L03	0.920176	0.54282	healthy_train
KU10K-03867	KU10K-03867_L01	0.927223	0.542797	healthy_train
KU10K-03842	KU10K-03842_L02	0.91954	0.54277	healthy_train
KU10K-03882	KU10K-03882_L02	0.915651	0.542766	healthy_train
C19-C031-V1	C19-C031-V1_L01	0.954889	0.542711	viral_v1_long
C19-R081-L1	C19-R081-L1_L01	0.95573	0.542703	viral_recov
KU10K-00128	KU10K-00128_L01	0.962206	0.542659	healthy_valid
KU10K-03848	KU10K-03848_L03	0.916555	0.542598	healthy_valid
KU10K-03826	KU10K-03826_L03	0.920033	0.542596	healthy_valid
KU10K-03867	KU10K-03867_L04	0.924899	0.542559	healthy_train
KU10K-03772	KU10K-03772_L02	0.919842	0.542486	healthy_train
KU10K-03782	KU10K-03782_L02	0.917871	0.542459	healthy_train
KU10K-03845	KU10K-03845_L03	0.924246	0.542448	healthy_valid
KU10K-03795	KU10K-03795_L02	0.916641	0.542446	healthy_train
KU10K-03807	KU10K-03807_L02	0.909144	0.542396	healthy_train
KU10K-03542	KU10K-03542_L01	0.962274	0.542375	depression
KU10K-03807	KU10K-03807_L01	0.908461	0.54234	healthy_train
KU10K-03813	KU10K-03813_L02	0.92313	0.542312	healthy_train
KU10K-03816	KU10K-03816_L03	0.922491	0.542307	healthy_valid
C19-R123-V1	C19-R123-V1_L01	0.963547	0.542295	viral_recov
KU10K-03867	KU10K-03867_L02	0.929211	0.542204	healthy_train
C19-R131-V1	C19-R131-V1_L01	0.962426	0.542193	viral_recov
KU10K-03879	KU10K-03879_L02	0.916395	0.542167	healthy_train
C19-C049-V3	C19-C049-V3_L01	0.968057	0.542125	viral_v3_long
KU10K-03721	KU10K-03721_L01	0.968032	0.542121	healthy_train
KU10K-01369	KU10K-01369_L01	0.955592	0.542107	healthy_train
KU10K-04018	KU10K-04018_L01	0.952032	0.54205	anxiety
KU10K-03831	KU10K-03831_L04	0.920139	0.541931	healthy_valid
KU10K-03845	KU10K-03845_L02	0.920351	0.541924	healthy_valid
KU10K-01395	KU10K-01395_L01	0.955686	0.541892	healthy_train
C19-C012-V1	C19-C012-V1_L01	0.968973	0.541878	viral_v1_long
KU10K-03543	KU10K-03543_L01	0.950857	0.541865	depression
KU10K-03790	KU10K-03790_L04	0.919817	0.54182	healthy_valid
KU10K-00438	KU10K-00438_L01	0.964745	0.541817	healthy_train
KU10K-03782	KU10K-03782_L03	0.920509	0.541786	healthy_train
KU10K-03779	KU10K-03779_L04	0.91831	0.541716	healthy_train
KU10K-03642	KU10K-03642_L01	0.942866	0.541716	healthy_valid
KU10K-05954	KU10K-05954_L01	0.955427	0.541667	healthy_train
KU10K-03813	KU10K-03813_L04	0.921025	0.541652	healthy_train
KU10K-03816	KU10K-03816_L04	0.923849	0.541645	healthy_valid
KU10K-03883	KU10K-03883_L03	0.921106	0.541537	healthy_train
KU10K-03685	KU10K-03685_L01	0.948572	0.541471	healthy_valid
KU10K-03864	KU10K-03864_L01	0.91001	0.541467	healthy_train
KU10K-03672	KU10K-03672_L01	0.946761	0.541415	healthy_train
KU10K-00528	KU10K-00528_L01	0.966443	0.541329	healthy_train
KU10K-03807	KU10K-03807_L03	0.912841	0.541275	healthy_train
C19-C026-V3	C19-C026-V3_L01	0.951585	0.541203	viral_v3_long
KU10K-03772	KU10K-03772_L01	0.921085	0.54114	healthy_train
KU10K-03833	KU10K-03833_L03	0.926898	0.541124	healthy_train
C19-C046-V2	C19-C046-V2_L01	0.962263	0.541068	viral_v2_long
KU10K-03790	KU10K-03790_L01	0.920868	0.541015	healthy_valid
KU10K-03540	KU10K-03540_L01	0.950697	0.540987	depression
KU10K-03674	KU10K-03674_L01	0.948719	0.540919	healthy_train
KU10K-03790	KU10K-03790_L02	0.922672	0.540917	healthy_valid
KU10K-03813	KU10K-03813_L03	0.92146	0.540863	healthy_train
KU10K-03803	KU10K-03803_L04	0.91218	0.540828	healthy_train
KU10K-01327	KU10K-01327_L01	0.957626	0.54079	healthy_train
KU10K-00358	KU10K-00358_L01	0.967784	0.540747	healthy_train
KU10K-03778	KU10K-03778_L03	0.921865	0.540718	healthy_train
KU10K-01326	KU10K-01326_L01	0.960057	0.540657	healthy_train
KU10K-00117	KU10K-00117_L01	0.965274	0.540603	healthy_train
C19-C015-V2	C19-C015-V2_L01	0.962113	0.540492	viral_v2_long
KU10K-00483	KU10K-00483_L01	0.96431	0.540489	healthy_train
KU10K-03879	KU10K-03879_L01	0.920253	0.540425	healthy_train
KU10K-03803	KU10K-03803_L02	0.916239	0.540336	healthy_train
KU10K-03879	KU10K-03879_L03	0.916279	0.540311	healthy_train
KU10K-03726	KU10K-03726_L01	0.962023	0.540299	healthy_valid
KU10K-03867	KU10K-03867_L03	0.930364	0.540202	healthy_train
KU10K-03807	KU10K-03807_L04	0.908248	0.54019	healthy_train
KU10K-00051	KU10K-00051_L01	0.972539	0.540168	attempt
KU10K-05949	KU10K-05949_L01	0.952601	0.540039	healthy_train
KU10K-03558	KU10K-03558_L01	0.973567	0.539975	depression
KU10K-03833	KU10K-03833_L04	0.928698	0.539907	healthy_train
C19-R096-L1	C19-R096-L1_L01	0.950909	0.539905	viral_recov
KU10K-00825	KU10K-00825_L01	0.964632	0.539869	healthy_valid
KU10K-03833	KU10K-03833_L01	0.925811	0.539798	healthy_train
C19-R096-V1	C19-R096-V1_L01	0.965878	0.539761	viral_recov
C19-C013-V1	C19-C013-V1_L01	0.968225	0.539742	viral_v1_long
KU10K-03879	KU10K-03879_L04	0.918601	0.539729	healthy_train
KU10K-03601	KU10K-03601_L01	0.973353	0.539718	healthy_train
KU10K-03772	KU10K-03772_L03	0.918274	0.539717	healthy_train
KU10K-00244	KU10K-00244_L01	0.964667	0.539712	healthy_train
KU10K-03772	KU10K-03772_L04	0.918788	0.539635	healthy_train
KU10K-00798	KU10K-00798_L01	0.964209	0.539626	healthy_train
KU10K-03671	KU10K-03671_L01	0.947891	0.539599	healthy_train
KU10K-01445	KU10K-01445_L01	0.954876	0.53955	healthy_train
KU10K-03746	KU10K-03746_L01	0.954983	0.539543	healthy_valid
KU10K-04028	KU10K-04028_L01	0.950071	0.539528	anxiety
ST40	ST40_L01	0.956078	0.539314	depression
KU10K-00339	KU10K-00339_L01	0.966345	0.53925	healthy_train
KU10K-03854	KU10K-03854_L01	0.923423	0.539126	healthy_train
C19-R093-V1	C19-R093-V1_L01	0.96326	0.53912	viral_recov
KU10K-03854	KU10K-03854_L04	0.921731	0.538944	healthy_train
KU10K-03790	KU10K-03790_L03	0.924279	0.538895	healthy_valid
C19-C020-V3	C19-C020-V3_L01	0.963026	0.53884	viral_v3_long
KU10K-03503	KU10K-03503_L01	0.967706	0.538706	attempt
KU10K-03531	KU10K-03531_L01	0.974619	0.538613	attempt
KU10K-03834	KU10K-03834_L02	0.926683	0.53859	healthy_train
KU10K-03834	KU10K-03834_L01	0.929187	0.538589	healthy_train
KU10K-03822	KU10K-03822_L01	0.927244	0.538532	healthy_valid
KU10K-03666	KU10K-03666_L01	0.948895	0.538507	healthy_valid
KU10K-00338	KU10K-00338_L01	0.965798	0.53834	healthy_train
ST47	ST47_L01	0.954743	0.538221	depression
KU10K-03835	KU10K-03835_L01	0.926922	0.538129	healthy_train
KU10K-03681	KU10K-03681_L01	0.9717	0.538062	healthy_valid
KU10K-03735	KU10K-03735_L01	0.962077	0.538005	healthy_valid
KU10K-03853	KU10K-03853_L04	0.919213	0.537952	healthy_train
KU10K-03574	KU10K-03574_L01	0.950456	0.537933	depression
KU10K-03854	KU10K-03854_L02	0.921649	0.537798	healthy_train
KU10K-03803	KU10K-03803_L03	0.918212	0.537698	healthy_train
KU10K-04031	KU10K-04031_L01	0.953746	0.53744	anxiety
KU10K-03855	KU10K-03855_L01	0.922339	0.537415	healthy_train
KU10K-03778	KU10K-03778_L04	0.926084	0.537389	healthy_train
KU10K-03778	KU10K-03778_L01	0.920592	0.537323	healthy_train
KU10K-03834	KU10K-03834_L03	0.928432	0.537322	healthy_train
KU10K-01477	KU10K-01477_L01	0.95507	0.537262	healthy_train
KU10K-03864	KU10K-03864_L04	0.916389	0.537205	healthy_train
KU10K-03834	KU10K-03834_L04	0.924452	0.537176	healthy_train
KU10K-03833	KU10K-03833_L02	0.927143	0.537115	healthy_train
KU10K-03853	KU10K-03853_L01	0.918596	0.537061	healthy_train
KU10K-03616	KU10K-03616_L01	0.971772	0.537013	healthy_train
KU10K-03806	KU10K-03806_L03	0.916832	0.536931	healthy_train
KU10K-00826	KU10K-00826_L01	0.964217	0.53692	healthy_train
KU10K-03754	KU10K-03754_L01	0.957843	0.536899	healthy_train
KU10K-00521	KU10K-00521_L01	0.966043	0.536888	healthy_train
C19-C036-V2	C19-C036-V2_L01	0.965561	0.536883	viral_v2_long
KU10K-03526	KU10K-03526_L01	0.972145	0.536882	attempt
KU10K-03758	KU10K-03758_L01	0.936864	0.536818	healthy_valid
KU10K-03626	KU10K-03626_L01	0.975542	0.536763	healthy_train
KU10K-03864	KU10K-03864_L03	0.916103	0.536683	healthy_train
KU10K-00406	KU10K-00406_L01	0.961891	0.536651	healthy_train
C19-R112-V1	C19-R112-V1_L01	0.961436	0.536624	viral_recov
KU10K-03571	KU10K-03571_L01	0.974245	0.536605	depression
C19-R014-V1	C19-R014-V1_L01	0.961586	0.536472	viral_recov
C19-C008-V1	C19-C008-V1_L01	0.962149	0.536325	viral_v1_long
KU10K-03792	KU10K-03792_L03	0.918266	0.536303	healthy_train
KU10K-03630	KU10K-03630_L01	0.959083	0.536298	healthy_train
KU10K-03586	KU10K-03586_L01	0.960127	0.536189	healthy_train
KU10K-03853	KU10K-03853_L02	0.920664	0.536165	healthy_train
KU10K-03945	KU10K-03945_L01	0.922947	0.53605	healthy_valid
KU10K-03669	KU10K-03669_L01	0.947867	0.535952	healthy_train
KU10K-03822	KU10K-03822_L04	0.92732	0.535925	healthy_valid
KU10K-04029	KU10K-04029_L01	0.954958	0.535922	anxiety
KU10K-00553	KU10K-00553_L01	0.966004	0.535916	healthy_valid
KU10K-01440	KU10K-01440_L01	0.956281	0.535862	healthy_train
C19-C049-V2	C19-C049-V2_L01	0.968739	0.535846	viral_v2_long
KU10K-03806	KU10K-03806_L04	0.9143	0.535723	healthy_train
C19-R021-V1	C19-R021-V1_L01	0.96686	0.535627	viral_recov
KU10K-03853	KU10K-03853_L03	0.917762	0.535555	healthy_train
KU10K-00311	KU10K-00311_L01	0.965658	0.535501	healthy_train
KU10K-03945	KU10K-03945_L04	0.920667	0.535492	healthy_valid
KU10K-03837	KU10K-03837_L01	0.926805	0.535475	healthy_train
KU10K-03588	KU10K-03588_L01	0.962224	0.535426	healthy_train
KU10K-04023	KU10K-04023_L01	0.953154	0.535422	anxiety
C19-R115-V1	C19-R115-V1_L01	0.962012	0.535328	viral_recov
KU10K-03838	KU10K-03838_L04	0.923462	0.535258	healthy_train
KU10K-03806	KU10K-03806_L01	0.915155	0.535248	healthy_train
KU10K-00572	KU10K-00572_L01	0.957613	0.53519	healthy_valid
KU10K-03822	KU10K-03822_L03	0.926884	0.53514	healthy_valid
KU10K-03482	KU10K-03482_L01	0.960186	0.53514	attempt
KU10K-00542	KU10K-00542_L01	0.966637	0.535093	healthy_train
KU10K-03855	KU10K-03855_L04	0.922297	0.535055	healthy_train
KU10K-03805	KU10K-03805_L01	0.917126	0.534936	healthy_train
KU10K-03838	KU10K-03838_L02	0.922501	0.534917	healthy_train
KU10K-03864	KU10K-03864_L02	0.913676	0.534804	healthy_train
KU10K-03792	KU10K-03792_L04	0.916955	0.534793	healthy_train
KU10K-03875	KU10K-03875_L03	0.929583	0.53479	healthy_train
KU10K-03778	KU10K-03778_L02	0.922537	0.534771	healthy_train
KU10K-03949	KU10K-03949_L04	0.923282	0.534683	healthy_train
KU10K-01464	KU10K-01464_L01	0.952948	0.534647	healthy_train
C19-C002-V1	C19-C002-V1_L01	0.953699	0.534602	viral_v1_long
KU10K-03792	KU10K-03792_L01	0.916445	0.534585	healthy_train
KU10K-01352	KU10K-01352_L01	0.952509	0.53444	healthy_train
KU10K-03843	KU10K-03843_L01	0.918523	0.534358	healthy_train
KU10K-01370	KU10K-01370_L01	0.953994	0.53435	healthy_train
KU10K-03876	KU10K-03876_L01	0.923461	0.534328	healthy_train
C19-C048-V2	C19-C048-V2_L01	0.970115	0.534294	viral_v2_long
KU10K-03835	KU10K-03835_L04	0.926848	0.534275	healthy_train
KU10K-00500	KU10K-00500_L01	0.963945	0.53424	healthy_train
C19-C041-V1	C19-C041-V1_L01	0.965154	0.53418	viral_v1_long
KU10K-03805	KU10K-03805_L02	0.914059	0.534133	healthy_train
KU10K-03868	KU10K-03868_L03	0.925169	0.53412	healthy_train
KU10K-03632	KU10K-03632_L01	0.959549	0.534025	healthy_train
KU10K-03844	KU10K-03844_L01	0.920313	0.533936	healthy_train
KU10K-03876	KU10K-03876_L04	0.922326	0.533915	healthy_train
KU10K-03945	KU10K-03945_L03	0.925412	0.533902	healthy_valid
KU10K-03519	KU10K-03519_L01	0.97319	0.533874	attempt
KU10K-03606	KU10K-03606_L01	0.978277	0.533865	healthy_valid
KU10K-03835	KU10K-03835_L03	0.925509	0.533862	healthy_train
KU10K-03806	KU10K-03806_L02	0.917066	0.533774	healthy_train
KU10K-03838	KU10K-03838_L01	0.921338	0.533701	healthy_train
KU10K-03767	KU10K-03767_L04	0.923278	0.533689	healthy_train
KU10K-03945	KU10K-03945_L02	0.924634	0.533663	healthy_valid
KU10K-05945	KU10K-05945_L01	0.949115	0.533624	healthy_train
KU10K-03767	KU10K-03767_L01	0.92258	0.533618	healthy_train
KU10K-03577	KU10K-03577_L01	0.932667	0.533593	healthy_train
KU10K-03844	KU10K-03844_L02	0.918417	0.533591	healthy_train
KU10K-03843	KU10K-03843_L02	0.920121	0.533484	healthy_train
KU10K-00780	KU10K-00780_L01	0.970441	0.533405	healthy_train
KU10K-03876	KU10K-03876_L02	0.923707	0.533354	healthy_train
KU10K-03949	KU10K-03949_L03	0.921005	0.533351	healthy_train
KU10K-03861	KU10K-03861_L02	0.916869	0.533287	healthy_valid
KU10K-01434	KU10K-01434_L01	0.955533	0.533272	healthy_train
KU10K-03805	KU10K-03805_L04	0.916753	0.533172	healthy_train
KU10K-00346	KU10K-00346_L01	0.965968	0.533168	healthy_train
KU10K-00551	KU10K-00551_L01	0.96613	0.533094	healthy_train
KU10K-00556	KU10K-00556_L01	0.967037	0.533061	healthy_train
C19-C003-V1	C19-C003-V1_L01	0.964922	0.533035	viral_v1_long
KU10K-04041	KU10K-04041_L01	0.952983	0.53301	anxiety
C19-R009-V1	C19-R009-V1_L01	0.959934	0.533009	viral_recov
KU10K-03689	KU10K-03689_L01	0.948266	0.532981	healthy_train
KU10K-03760	KU10K-03760_L01	0.945484	0.532979	healthy_valid
KU10K-03822	KU10K-03822_L02	0.923752	0.532919	healthy_valid
KU10K-03792	KU10K-03792_L02	0.916296	0.532895	healthy_train
C19-R018-V1	C19-R018-V1_L01	0.966286	0.532893	viral_recov
KU10K-03855	KU10K-03855_L03	0.921659	0.532851	healthy_train
KU10K-03949	KU10K-03949_L02	0.919815	0.532722	healthy_train
KU10K-01435	KU10K-01435_L01	0.954504	0.532638	healthy_train
KU10K-03819	KU10K-03819_L01	0.92606	0.532616	healthy_train
C19-R120-V1	C19-R120-V1_L01	0.964412	0.532614	viral_recov
KU10K-03843	KU10K-03843_L03	0.922454	0.532529	healthy_train
KU10K-03839	KU10K-03839_L04	0.926905	0.532493	healthy_train
KU10K-03823	KU10K-03823_L01	0.926461	0.532488	healthy_train
KU10K-03830	KU10K-03830_L01	0.920018	0.532472	healthy_train
KU10K-03949	KU10K-03949_L01	0.918311	0.532421	healthy_train
KU10K-03805	KU10K-03805_L03	0.915324	0.532353	healthy_train
KU10K-03823	KU10K-03823_L02	0.922793	0.532316	healthy_train
KU10K-03819	KU10K-03819_L02	0.92685	0.532306	healthy_train
KU10K-03868	KU10K-03868_L01	0.924371	0.532277	healthy_train
KU10K-01353	KU10K-01353_L01	0.953129	0.53221	healthy_train
KU10K-03844	KU10K-03844_L04	0.915755	0.532203	healthy_train
C19-R098-V1	C19-R098-V1_L01	0.963969	0.532179	viral_recov
KU10K-03857	KU10K-03857_L01	0.918512	0.532171	healthy_valid
KU10K-03861	KU10K-03861_L01	0.916578	0.53214	healthy_valid
KU10K-03844	KU10K-03844_L03	0.920161	0.53211	healthy_train
KU10K-03855	KU10K-03855_L02	0.918124	0.532104	healthy_train
KU10K-03717	KU10K-03717_L01	0.961055	0.532034	healthy_train
KU10K-03823	KU10K-03823_L04	0.927151	0.532032	healthy_train
C19-C021-V2	C19-C021-V2_L01	0.969532	0.532001	viral_v2_long
KU10K-01433	KU10K-01433_L01	0.955185	0.53194	healthy_valid
KU10K-03876	KU10K-03876_L03	0.923933	0.531926	healthy_train
KU10K-03857	KU10K-03857_L02	0.91901	0.531921	healthy_valid
KU10K-03857	KU10K-03857_L04	0.916723	0.531913	healthy_valid
KU10K-03808	KU10K-03808_L04	0.92633	0.531912	healthy_train
KU10K-00467	KU10K-00467_L01	0.966674	0.531907	healthy_train
KU10K-03838	KU10K-03838_L03	0.923478	0.531897	healthy_train
C19-R139-V1	C19-R139-V1_L01	0.964898	0.531876	viral_recov
KU10K-01471	KU10K-01471_L01	0.951294	0.531874	healthy_train
KU10K-03868	KU10K-03868_L04	0.927127	0.531791	healthy_train
KU10K-03830	KU10K-03830_L02	0.921438	0.531761	healthy_train
C19-C026-V2	C19-C026-V2_L01	0.948173	0.531752	viral_v2_long
KU10K-03830	KU10K-03830_L04	0.918295	0.531697	healthy_train
KU10K-00158	KU10K-00158_L01	0.96422	0.531673	attempt
KU10K-01467	KU10K-01467_L01	0.951579	0.531653	healthy_train
KU10K-03861	KU10K-03861_L04	0.915944	0.531643	healthy_valid
KU10K-03868	KU10K-03868_L02	0.925594	0.531582	healthy_train
KU10K-03837	KU10K-03837_L02	0.9265	0.531528	healthy_train
KU10K-03724	KU10K-03724_L01	0.959365	0.531507	healthy_train
KU10K-03729	KU10K-03729_L01	0.945857	0.531423	healthy_train
KU10K-03823	KU10K-03823_L03	0.92416	0.531362	healthy_train
KU10K-01426	KU10K-01426_L01	0.953233	0.531342	healthy_train
KU10K-03861	KU10K-03861_L03	0.914914	0.531319	healthy_valid
C19-C004-V1	C19-C004-V1_L01	0.958432	0.531229	viral_v1_long
KU10K-03647	KU10K-03647_L01	0.958905	0.531227	healthy_train
KU10K-03835	KU10K-03835_L02	0.922698	0.531207	healthy_train
C19-R001-V1	C19-R001-V1_L01	0.954351	0.531154	viral_recov
KU10K-03498	KU10K-03498_L01	0.965966	0.531145	attempt
KU10K-03819	KU10K-03819_L03	0.929513	0.530978	healthy_train
KU10K-03875	KU10K-03875_L01	0.92845	0.530933	healthy_train
KU10K-03880	KU10K-03880_L03	0.917806	0.530929	healthy_train
KU10K-03857	KU10K-03857_L03	0.919541	0.530866	healthy_valid
C19-C007-V1	C19-C007-V1_L01	0.961606	0.530742	viral_v1_long
KU10K-03738	KU10K-03738_L01	0.962035	0.530682	healthy_train
KU10K-03761	KU10K-03761_L01	0.95114	0.530666	healthy_train
KU10K-03843	KU10K-03843_L04	0.92016	0.530614	healthy_train
KU10K-03818	KU10K-03818_L04	0.927791	0.530533	healthy_valid
C19-C003-V2	C19-C003-V2_L01	0.962279	0.530467	viral_v2_long
KU10K-04038	KU10K-04038_L01	0.952042	0.530423	anxiety
C19-C046-V1	C19-C046-V1_L01	0.967041	0.53033	viral_v1_long
KU10K-03680	KU10K-03680_L01	0.949057	0.530297	healthy_train
KU10K-03839	KU10K-03839_L01	0.925067	0.530266	healthy_train
KU10K-03493	KU10K-03493_L01	0.936068	0.530257	attempt
KU10K-03767	KU10K-03767_L03	0.921082	0.530191	healthy_train
KU10K-03837	KU10K-03837_L04	0.925831	0.530012	healthy_train
KU10K-04027	KU10K-04027_L01	0.952677	0.529972	anxiety
KU10K-03943	KU10K-03943_L01	0.92644	0.529957	healthy_train
KU10K-00524	KU10K-00524_L01	0.967029	0.529921	healthy_train
KU10K-03880	KU10K-03880_L04	0.919706	0.529907	healthy_train
KU10K-03875	KU10K-03875_L04	0.926751	0.529836	healthy_train
C19-R116-V1	C19-R116-V1_L01	0.962878	0.529836	viral_recov
KU10K-03767	KU10K-03767_L02	0.918671	0.529784	healthy_train
KU10K-03759	KU10K-03759_L01	0.963409	0.529765	healthy_valid
KU10K-03880	KU10K-03880_L01	0.916576	0.529682	healthy_train
KU10K-03643	KU10K-03643_L01	0.959099	0.529628	healthy_train
C19-C039-V1	C19-C039-V1_L01	0.966762	0.529488	viral_v1_long
KU10K-03714	KU10K-03714_L01	0.959658	0.529442	healthy_train
KU10K-03818	KU10K-03818_L02	0.926034	0.52944	healthy_valid
KU10K-03839	KU10K-03839_L03	0.927783	0.529406	healthy_train
KU10K-00423	KU10K-00423_L01	0.96624	0.529377	healthy_valid
KU10K-01359	KU10K-01359_L01	0.954034	0.529365	healthy_train
KU10K-03830	KU10K-03830_L03	0.922968	0.529247	healthy_train
KU10K-03839	KU10K-03839_L02	0.924712	0.52923	healthy_train
KU10K-00545	KU10K-00545_L01	0.966336	0.529186	healthy_train
C19-C036-V1	C19-C036-V1_L01	0.956127	0.529157	viral_v1_long
KU10K-03808	KU10K-03808_L02	0.927403	0.529118	healthy_train
KU10K-03828	KU10K-03828_L01	0.925427	0.529104	healthy_train
KU10K-00519	KU10K-00519_L01	0.965961	0.528973	healthy_train
KU10K-03556	KU10K-03556_L01	0.975665	0.528949	depression
KU10K-03837	KU10K-03837_L03	0.925659	0.528947	healthy_train
KU10K-03819	KU10K-03819_L04	0.927133	0.528927	healthy_train
KU10K-01409	KU10K-01409_L01	0.954546	0.528847	healthy_train
KU10K-03654	KU10K-03654_L01	0.959321	0.528716	healthy_train
KU10K-00822	KU10K-00822_L01	0.96767	0.528714	healthy_valid
KU10K-01484	KU10K-01484_L01	0.954005	0.52854	healthy_valid
KU10K-01456	KU10K-01456_L01	0.954734	0.528503	healthy_train
C19-R138-V1	C19-R138-V1_L01	0.960326	0.528485	viral_recov
KU10K-03808	KU10K-03808_L01	0.92629	0.52848	healthy_train
KU10K-03818	KU10K-03818_L03	0.926533	0.528367	healthy_valid
C19-R146-V1	C19-R146-V1_L01	0.963914	0.528365	viral_recov
C19-C046-V3	C19-C046-V3_L01	0.968507	0.528356	viral_v3_long
C19-C020-V1	C19-C020-V1_L01	0.970735	0.528282	viral_v1_long
KU10K-03716	KU10K-03716_L01	0.959058	0.528091	healthy_valid
C19-C011-V1	C19-C011-V1_L01	0.962264	0.528057	viral_v1_long
KU10K-01448	KU10K-01448_L01	0.950518	0.527973	healthy_train
KU10K-03804	KU10K-03804_L01	0.913222	0.527944	healthy_valid
KU10K-03943	KU10K-03943_L03	0.924365	0.527939	healthy_train
KU10K-01385	KU10K-01385_L01	0.953539	0.527938	healthy_train
KU10K-03499	KU10K-03499_L01	0.970019	0.527867	attempt
KU10K-00141	KU10K-00141_L01	0.963096	0.527856	healthy_valid
KU10K-03875	KU10K-03875_L02	0.927134	0.527766	healthy_train
KU10K-03808	KU10K-03808_L03	0.925139	0.527744	healthy_train
C19-C049-V1	C19-C049-V1_L01	0.968319	0.52774	viral_v1_long
KU10K-03880	KU10K-03880_L02	0.918263	0.527644	healthy_train
KU10K-03784	KU10K-03784_L01	0.920569	0.527643	healthy_valid
KU10K-03828	KU10K-03828_L03	0.923432	0.527597	healthy_train
KU10K-03818	KU10K-03818_L01	0.924367	0.527591	healthy_valid
KU10K-01399	KU10K-01399_L01	0.954364	0.527555	healthy_valid
KU10K-03734	KU10K-03734_L01	0.965407	0.527546	healthy_train
KU10K-03564	KU10K-03564_L01	0.977242	0.52748	depression
KU10K-03753	KU10K-03753_L01	0.936861	0.527407	healthy_train
KU10K-00592	KU10K-00592_L01	0.954261	0.527359	healthy_valid
KU10K-03828	KU10K-03828_L04	0.924238	0.527352	healthy_train
KU10K-03596	KU10K-03596_L01	0.978284	0.527222	healthy_train
KU10K-03742	KU10K-03742_L01	0.950766	0.527137	healthy_train
C19-C017-V1	C19-C017-V1_L01	0.960024	0.527123	viral_v1_long
C19-C059-V1	C19-C059-V1_L01	0.956523	0.527072	viral_v1_long
KU10K-03544	KU10K-03544_L01	0.952417	0.526982	depression
KU10K-03804	KU10K-03804_L02	0.913538	0.526845	healthy_valid
C19-R010-L1	C19-R010-L1_L01	0.954327	0.526807	viral_recov
KU10K-00409	KU10K-00409_L01	0.966215	0.52677	healthy_train
KU10K-03942	KU10K-03942_L02	0.922505	0.526759	healthy_train
KU10K-03688	KU10K-03688_L01	0.945164	0.526734	healthy_train
KU10K-04042	KU10K-04042_L01	0.952688	0.526698	anxiety
KU10K-03750	KU10K-03750_L01	0.941959	0.526613	healthy_valid
KU10K-03943	KU10K-03943_L04	0.924776	0.526562	healthy_train
KU10K-00353	KU10K-00353_L01	0.967354	0.526524	healthy_train
KU10K-03804	KU10K-03804_L03	0.917885	0.526515	healthy_valid
KU10K-03725	KU10K-03725_L01	0.965222	0.526459	healthy_valid
KU10K-03828	KU10K-03828_L02	0.923177	0.52644	healthy_train
KU10K-03679	KU10K-03679_L01	0.948224	0.526388	healthy_valid
C19-C043-V1	C19-C043-V1_L01	0.950221	0.526363	viral_v1_long
KU10K-03739	KU10K-03739_L01	0.936746	0.526295	healthy_train
KU10K-03852	KU10K-03852_L03	0.92142	0.526274	healthy_train
KU10K-05947	KU10K-05947_L01	0.952587	0.526238	healthy_train
KU10K-01489	KU10K-01489_L01	0.958164	0.526224	healthy_train
KU10K-01410	KU10K-01410_L01	0.951005	0.526221	healthy_train
KU10K-00076	KU10K-00076_L01	0.961751	0.526105	healthy_train
KU10K-03852	KU10K-03852_L01	0.919584	0.526047	healthy_train
KU10K-03749	KU10K-03749_L01	0.941498	0.525993	healthy_train
KU10K-03730	KU10K-03730_L01	0.963307	0.525921	healthy_valid
KU10K-03646	KU10K-03646_L01	0.959673	0.525755	healthy_train
KU10K-01485	KU10K-01485_L01	0.958354	0.525622	healthy_train
KU10K-01365	KU10K-01365_L01	0.954039	0.52559	healthy_train
KU10K-03943	KU10K-03943_L02	0.92354	0.525577	healthy_train
KU10K-03942	KU10K-03942_L01	0.922195	0.525489	healthy_train
KU10K-03506	KU10K-03506_L01	0.960943	0.525399	attempt
KU10K-03752	KU10K-03752_L01	0.962007	0.525387	healthy_valid
KU10K-03852	KU10K-03852_L04	0.923297	0.525264	healthy_train
KU10K-03653	KU10K-03653_L01	0.959772	0.525154	healthy_valid
KU10K-03942	KU10K-03942_L04	0.922079	0.52511	healthy_train
KU10K-03638	KU10K-03638_L01	0.94001	0.525077	healthy_train
KU10K-01451	KU10K-01451_L01	0.952726	0.524965	healthy_train
KU10K-03784	KU10K-03784_L02	0.923908	0.524857	healthy_valid
KU10K-03736	KU10K-03736_L01	0.96372	0.524561	healthy_train
KU10K-03942	KU10K-03942_L03	0.920639	0.524542	healthy_train
KU10K-01479	KU10K-01479_L01	0.953568	0.52454	healthy_train
KU10K-03487	KU10K-03487_L01	0.940393	0.524499	attempt
KU10K-03784	KU10K-03784_L04	0.919345	0.524097	healthy_valid
KU10K-03804	KU10K-03804_L04	0.913972	0.523987	healthy_valid
KU10K-03723	KU10K-03723_L01	0.940549	0.523785	healthy_train
C19-C007-V2	C19-C007-V2_L01	0.961539	0.523772	viral_v2_long
KU10K-03757	KU10K-03757_L01	0.960425	0.523701	healthy_train
KU10K-01422	KU10K-01422_L01	0.952978	0.523483	healthy_valid
KU10K-01480	KU10K-01480_L01	0.953137	0.523405	healthy_valid
C19-C043-V2	C19-C043-V2_L01	0.95175	0.523351	viral_v2_long
KU10K-03741	KU10K-03741_L01	0.961713	0.523232	healthy_train
KU10K-03852	KU10K-03852_L02	0.920982	0.523124	healthy_train
KU10K-03559	KU10K-03559_L01	0.977148	0.523112	depression
KU10K-01423	KU10K-01423_L01	0.95283	0.5231	healthy_train
KU10K-01483	KU10K-01483_L01	0.954731	0.523071	healthy_train
KU10K-01453	KU10K-01453_L01	0.951193	0.522981	healthy_valid
KU10K-03618	KU10K-03618_L01	0.976567	0.522821	healthy_train
KU10K-00940	KU10K-00940_L01	0.951531	0.522802	healthy_train
KU10K-00554	KU10K-00554_L01	0.966081	0.522791	healthy_valid
KU10K-03594	KU10K-03594_L01	0.970983	0.522549	healthy_train
KU10K-03784	KU10K-03784_L03	0.919289	0.522508	healthy_valid
KU10K-01363	KU10K-01363_L01	0.952593	0.522473	healthy_train
KU10K-01454	KU10K-01454_L01	0.953088	0.522371	healthy_train
KU10K-03497	KU10K-03497_L01	0.937298	0.522298	attempt
KU10K-03881	KU10K-03881_L04	0.919846	0.522287	healthy_train
KU10K-03874	KU10K-03874_L04	0.929441	0.522255	healthy_train
KU10K-03832	KU10K-03832_L01	0.924947	0.522206	healthy_train
KU10K-03832	KU10K-03832_L02	0.92131	0.522015	healthy_train
C19-C010-V1	C19-C010-V1_L01	0.951756	0.521888	viral_v1_long
C19-R108-V1	C19-R108-V1_L01	0.966836	0.521864	viral_recov
C19-R036-V1	C19-R036-V1_L01	0.961823	0.52181	viral_recov
KU10K-03651	KU10K-03651_L01	0.940787	0.521716	healthy_train
C19-C024-V1	C19-C024-V1_L01	0.935949	0.521638	viral_v1_long
KU10K-00799	KU10K-00799_L01	0.965956	0.521548	healthy_valid
KU10K-03617	KU10K-03617_L01	0.97333	0.521544	healthy_train
KU10K-03575	KU10K-03575_L01	0.93887	0.521362	healthy_train
KU10K-03881	KU10K-03881_L01	0.919051	0.521361	healthy_train
KU10K-03631	KU10K-03631_L01	0.961382	0.520954	healthy_train
KU10K-03748	KU10K-03748_L01	0.940733	0.520942	healthy_train
KU10K-03851	KU10K-03851_L01	0.921735	0.5208	healthy_train
KU10K-03832	KU10K-03832_L04	0.923392	0.520776	healthy_train
KU10K-03832	KU10K-03832_L03	0.921489	0.520608	healthy_train
KU10K-03755	KU10K-03755_L01	0.946794	0.520577	healthy_train
KU10K-03847	KU10K-03847_L01	0.922092	0.520415	healthy_train
KU10K-03881	KU10K-03881_L02	0.920608	0.520391	healthy_train
KU10K-03728	KU10K-03728_L01	0.942032	0.520284	healthy_train
KU10K-01475	KU10K-01475_L01	0.951503	0.520239	healthy_train
KU10K-03881	KU10K-03881_L03	0.917798	0.520181	healthy_train
C19-C021-V1	C19-C021-V1_L01	0.969683	0.520003	viral_v1_long
KU10K-01439	KU10K-01439_L01	0.954756	0.519851	healthy_train
KU10K-03578	KU10K-03578_L01	0.935135	0.519794	healthy_valid
KU10K-03732	KU10K-03732_L01	0.929153	0.51974	healthy_train
KU10K-01462	KU10K-01462_L01	0.950793	0.5197	healthy_train
KU10K-03660	KU10K-03660_L01	0.974567	0.519631	healthy_train
KU10K-03858	KU10K-03858_L01	0.924349	0.519598	healthy_train
KU10K-00820	KU10K-00820_L01	0.966755	0.519398	healthy_train
KU10K-03874	KU10K-03874_L02	0.930039	0.519341	healthy_train
KU10K-03874	KU10K-03874_L01	0.929031	0.519043	healthy_train
KU10K-03637	KU10K-03637_L01	0.96105	0.518935	healthy_train
KU10K-01391	KU10K-01391_L01	0.954598	0.518908	healthy_train
KU10K-03946	KU10K-03946_L02	0.920977	0.518849	healthy_train
KU10K-03874	KU10K-03874_L03	0.927925	0.518839	healthy_train
KU10K-03727	KU10K-03727_L01	0.944328	0.518685	healthy_train
KU10K-03851	KU10K-03851_L03	0.925775	0.518685	healthy_train
KU10K-03847	KU10K-03847_L02	0.922451	0.518621	healthy_train
KU10K-03851	KU10K-03851_L02	0.922903	0.51861	healthy_train
KU10K-03550	KU10K-03550_L01	0.951075	0.518555	depression
KU10K-03510	KU10K-03510_L01	0.955526	0.518494	attempt
KU10K-03598	KU10K-03598_L01	0.978272	0.518422	healthy_train
KU10K-04019	KU10K-04019_L01	0.950754	0.518374	anxiety
KU10K-01416	KU10K-01416_L01	0.951631	0.518242	healthy_train
KU10K-03744	KU10K-03744_L01	0.945072	0.51823	healthy_valid
KU10K-03658	KU10K-03658_L01	0.961409	0.518189	healthy_train
KU10K-03541	KU10K-03541_L01	0.946575	0.518027	depression
KU10K-00580	KU10K-00580_L01	0.953241	0.517991	healthy_train
KU10K-03947	KU10K-03947_L02	0.921682	0.517976	healthy_train
KU10K-03860	KU10K-03860_L04	0.916949	0.517937	healthy_train
KU10K-01417	KU10K-01417_L01	0.950348	0.517598	healthy_valid
KU10K-03946	KU10K-03946_L01	0.925027	0.517529	healthy_train
KU10K-03488	KU10K-03488_L01	0.941402	0.517526	attempt
KU10K-03635	KU10K-03635_L01	0.950884	0.517386	healthy_train
KU10K-03947	KU10K-03947_L01	0.92391	0.517384	healthy_train
KU10K-03946	KU10K-03946_L03	0.920962	0.517318	healthy_train
C19-C010-V2	C19-C010-V2_L01	0.962575	0.517233	viral_v2_long
KU10K-03722	KU10K-03722_L01	0.965535	0.517127	healthy_train
KU10K-03504	KU10K-03504_L01	0.951949	0.517104	attempt
KU10K-03851	KU10K-03851_L04	0.92232	0.51701	healthy_train
KU10K-03858	KU10K-03858_L02	0.924702	0.516976	healthy_train
KU10K-03639	KU10K-03639_L01	0.959633	0.516915	healthy_train
KU10K-03492	KU10K-03492_L01	0.940368	0.516773	attempt
KU10K-03847	KU10K-03847_L04	0.921092	0.516768	healthy_train
KU10K-03947	KU10K-03947_L04	0.920042	0.516748	healthy_train
KU10K-01355	KU10K-01355_L01	0.951037	0.51648	healthy_train
KU10K-01406	KU10K-01406_L01	0.954926	0.516404	healthy_train
KU10K-03846	KU10K-03846_L04	0.922963	0.516297	healthy_train
KU10K-03812	KU10K-03812_L04	0.922745	0.516261	healthy_train
KU10K-03566	KU10K-03566_L01	0.97418	0.516233	depression
KU10K-03846	KU10K-03846_L01	0.922457	0.516203	healthy_train
KU10K-03858	KU10K-03858_L04	0.923517	0.516118	healthy_train
KU10K-03946	KU10K-03946_L04	0.923199	0.516113	healthy_train
KU10K-03947	KU10K-03947_L03	0.924346	0.516046	healthy_train
KU10K-03812	KU10K-03812_L01	0.924187	0.515594	healthy_train
KU10K-03812	KU10K-03812_L02	0.92434	0.515486	healthy_train
KU10K-03860	KU10K-03860_L01	0.914761	0.515473	healthy_train
KU10K-00937	KU10K-00937_L01	0.95281	0.515351	healthy_train
KU10K-03812	KU10K-03812_L03	0.925676	0.515335	healthy_train
KU10K-01360	KU10K-01360_L01	0.953332	0.515277	healthy_train
KU10K-03860	KU10K-03860_L02	0.914421	0.515199	healthy_train
KU10K-00938	KU10K-00938_L01	0.951532	0.515178	healthy_train
KU10K-03847	KU10K-03847_L03	0.921228	0.515119	healthy_train
KU10K-03573	KU10K-03573_L01	0.97093	0.515009	depression
KU10K-03509	KU10K-03509_L01	0.95977	0.514882	attempt
KU10K-03846	KU10K-03846_L03	0.920149	0.514874	healthy_train
KU10K-00872	KU10K-00872_L01	0.965562	0.514814	healthy_train
KU10K-03858	KU10K-03858_L03	0.923385	0.514662	healthy_train
KU10K-03650	KU10K-03650_L01	0.960373	0.51464	healthy_train
KU10K-03846	KU10K-03846_L02	0.91869	0.514598	healthy_train
KU10K-03860	KU10K-03860_L03	0.918062	0.51452	healthy_train
C19-C025-V1	C19-C025-V1_L01	0.934526	0.514165	viral_v1_long
KU10K-00823	KU10K-00823_L01	0.965853	0.514102	healthy_train
KU10K-00867	KU10K-00867_L01	0.96417	0.514075	healthy_valid
KU10K-03731	KU10K-03731_L01	0.940626	0.513947	healthy_train
KU10K-03590	KU10K-03590_L01	0.976756	0.513867	healthy_train
KU10K-00593	KU10K-00593_L01	0.952547	0.513355	healthy_train
KU10K-01458	KU10K-01458_L01	0.950647	0.513212	healthy_train
KU10K-03562	KU10K-03562_L01	0.975368	0.512987	depression
KU10K-01354	KU10K-01354_L01	0.952489	0.512619	healthy_train
KU10K-03718	KU10K-03718_L01	0.941727	0.512302	healthy_train
KU10K-03484	KU10K-03484_L01	0.937294	0.512125	attempt
KU10K-01357	KU10K-01357_L01	0.951684	0.512112	healthy_train
KU10K-05955	KU10K-05955_L01	0.957782	0.512099	healthy_valid
C19-C027-V1	C19-C027-V1_L01	0.948562	0.511801	viral_v1_long
KU10K-03579	KU10K-03579_L01	0.934183	0.511554	healthy_train
KU10K-03609	KU10K-03609_L01	0.974748	0.511402	healthy_train
KU10K-03648	KU10K-03648_L01	0.960234	0.511081	healthy_train
C19-C041-V2	C19-C041-V2_L01	0.96669	0.510533	viral_v2_long
KU10K-00778	KU10K-00778_L01	0.967804	0.509443	healthy_train
KU10K-03490	KU10K-03490_L01	0.943335	0.509366	attempt
KU10K-05952	KU10K-05952_L01	0.95123	0.508922	healthy_train
C19-C033-V1	C19-C033-V1_L01	0.95273	0.508423	viral_v1_long
KU10K-03593	KU10K-03593_L01	0.973235	0.508143	healthy_train
KU10K-01413	KU10K-01413_L01	0.948037	0.507731	healthy_train
KU10K-03641	KU10K-03641_L01	0.943747	0.507624	healthy_valid
KU10K-03561	KU10K-03561_L01	0.977029	0.507519	depression
KU10K-00861	KU10K-00861_L01	0.950195	0.506874	healthy_train
KU10K-03636	KU10K-03636_L01	0.96054	0.505321	healthy_train
KU10K-03600	KU10K-03600_L01	0.973407	0.504134	healthy_train
KU10K-03529	KU10K-03529_L01	0.974192	0.502145	attempt
KU10K-02029	KU10K-02029_L01	0.927454	0.493956	healthy_test
KU10K-03003	KU10K-03003_L01	0.930834	0.488401	healthy_test
KU10K-02767	KU10K-02767_L01	0.932305	0.4884	healthy_test
KU10K-03028	KU10K-03028_L01	0.935706	0.486628	healthy_test
KU10K-02777	KU10K-02777_L01	0.934125	0.486595	healthy_test
KU10K-03032	KU10K-03032_L01	0.932217	0.48657	healthy_test
KU10K-02915	KU10K-02915_L01	0.932559	0.48572	healthy_test
KU10K-02986	KU10K-02986_L01	0.933972	0.485009	healthy_test
KU10K-02960	KU10K-02960_L01	0.928356	0.484926	healthy_test
KU10K-02991	KU10K-02991_L01	0.936989	0.484874	healthy_test
KU10K-02165	KU10K-02165_L01	0.929083	0.484708	healthy_test
KU10K-02990	KU10K-02990_L01	0.931692	0.484688	healthy_test
KU10K-02532	KU10K-02532_L01	0.934752	0.48467	healthy_test
KU10K-02536	KU10K-02536_L01	0.930122	0.484642	healthy_test
KU10K-02192	KU10K-02192_L01	0.930344	0.484604	healthy_test
KU10K-02955	KU10K-02955_L01	0.937283	0.484578	healthy_test
KU10K-02291	KU10K-02291_L01	0.927328	0.484371	healthy_test
KU10K-02558	KU10K-02558_L01	0.933519	0.483704	healthy_test
KU10K-02932	KU10K-02932_L01	0.92673	0.483672	healthy_test
KU10K-02381	KU10K-02381_L01	0.930145	0.483514	healthy_test
KU10K-02989	KU10K-02989_L01	0.931306	0.483478	healthy_test
KU10K-02992	KU10K-02992_L01	0.926775	0.483422	healthy_test
KU10K-02331	KU10K-02331_L01	0.932489	0.483234	healthy_test
KU10K-02968	KU10K-02968_L01	0.929775	0.483117	healthy_test
KU10K-02786	KU10K-02786_L01	0.935573	0.48309	healthy_test
KU10K-02559	KU10K-02559_L01	0.932186	0.482816	healthy_test
KU10K-02840	KU10K-02840_L01	0.92968	0.482796	healthy_test
KU10K-02997	KU10K-02997_L01	0.936793	0.482665	healthy_test
KU10K-02769	KU10K-02769_L01	0.928409	0.482659	healthy_test
KU10K-03027	KU10K-03027_L01	0.934337	0.48261	healthy_test
KU10K-02959	KU10K-02959_L01	0.93432	0.482595	healthy_test
KU10K-02567	KU10K-02567_L01	0.933189	0.482455	healthy_test
KU10K-02681	KU10K-02681_L01	0.923982	0.482409	healthy_test
KU10K-03008	KU10K-03008_L01	0.925407	0.482331	healthy_test
KU10K-03043	KU10K-03043_L01	0.9325	0.482321	healthy_test
KU10K-00922	KU10K-00922_L01	0.92778	0.482169	healthy_test
KU10K-02851	KU10K-02851_L01	0.9298	0.481724	healthy_test
KU10K-02402	KU10K-02402_L01	0.933467	0.481644	healthy_test
KU10K-02240	KU10K-02240_L01	0.933625	0.481632	healthy_test
KU10K-03042	KU10K-03042_L01	0.935962	0.481588	healthy_test
KU10K-02622	KU10K-02622_L01	0.925501	0.481544	healthy_test
KU10K-03034	KU10K-03034_L01	0.928646	0.481363	healthy_test
KU10K-02976	KU10K-02976_L01	0.926403	0.481345	healthy_test
KU10K-02330	KU10K-02330_L01	0.921575	0.481243	healthy_test
KU10K-02496	KU10K-02496_L01	0.927151	0.481209	healthy_test
KU10K-02689	KU10K-02689_L01	0.927653	0.481178	healthy_test
KU10K-02306	KU10K-02306_L01	0.929575	0.481078	healthy_test
KU10K-02407	KU10K-02407_L01	0.926233	0.481072	healthy_test
KU10K-02408	KU10K-02408_L01	0.930365	0.481069	healthy_test
KU10K-02732	KU10K-02732_L01	0.926652	0.48093	healthy_test
KU10K-02643	KU10K-02643_L01	0.929642	0.480499	healthy_test
KU10K-02466	KU10K-02466_L01	0.928518	0.480271	healthy_test
KU10K-02881	KU10K-02881_L01	0.930044	0.480104	healthy_test
KU10K-02920	KU10K-02920_L01	0.929119	0.480027	healthy_test
KU10K-02936	KU10K-02936_L01	0.932494	0.480022	healthy_test
KU10K-02343	KU10K-02343_L01	0.930547	0.479971	healthy_test
KU10K-02688	KU10K-02688_L01	0.925572	0.479748	healthy_test
KU10K-02612	KU10K-02612_L01	0.93085	0.479654	healthy_test
KU10K-03002	KU10K-03002_L01	0.929161	0.479614	healthy_test
KU10K-02531	KU10K-02531_L01	0.925277	0.479515	healthy_test
KU10K-02454	KU10K-02454_L01	0.914027	0.479507	healthy_test
KU10K-02984	KU10K-02984_L01	0.936541	0.479462	healthy_test
KU10K-03019	KU10K-03019_L01	0.918039	0.479267	healthy_test
KU10K-02173	KU10K-02173_L01	0.936629	0.478818	healthy_test
KU10K-02967	KU10K-02967_L01	0.928222	0.478758	healthy_test
KU10K-02683	KU10K-02683_L01	0.933483	0.478651	healthy_test
KU10K-02500	KU10K-02500_L01	0.929632	0.478634	healthy_test
KU10K-02690	KU10K-02690_L01	0.930202	0.478629	healthy_test
KU10K-02557	KU10K-02557_L01	0.928536	0.478601	healthy_test
KU10K-02283	KU10K-02283_L01	0.929808	0.478574	healthy_test
KU10K-02776	KU10K-02776_L01	0.931501	0.478539	healthy_test
KU10K-02515	KU10K-02515_L01	0.929371	0.478508	healthy_test
KU10K-03007	KU10K-03007_L01	0.919326	0.478332	healthy_test
KU10K-03009	KU10K-03009_L01	0.927317	0.478317	healthy_test
KU10K-02917	KU10K-02917_L01	0.913698	0.478147	healthy_test
KU10K-02966	KU10K-02966_L01	0.916128	0.478087	healthy_test
KU10K-03030	KU10K-03030_L01	0.925453	0.47777	healthy_test
KU10K-02636	KU10K-02636_L01	0.917342	0.477723	healthy_test
KU10K-02524	KU10K-02524_L01	0.931419	0.477688	healthy_test
KU10K-02578	KU10K-02578_L01	0.933706	0.477587	healthy_test
KU10K-02543	KU10K-02543_L01	0.933311	0.477512	healthy_test
KU10K-02765	KU10K-02765_L01	0.928242	0.477353	healthy_test
KU10K-02418	KU10K-02418_L01	0.93327	0.477192	healthy_test
KU10K-03046	KU10K-03046_L01	0.918149	0.477124	healthy_test
KU10K-02848	KU10K-02848_L01	0.930164	0.476971	healthy_test
KU10K-02876	KU10K-02876_L01	0.926604	0.476881	healthy_test
KU10K-02150	KU10K-02150_L01	0.933595	0.476818	healthy_test
KU10K-02700	KU10K-02700_L01	0.924973	0.476783	healthy_test
KU10K-02392	KU10K-02392_L01	0.926875	0.476051	healthy_test
KU10K-02838	KU10K-02838_L01	0.922885	0.475871	healthy_test
KU10K-02853	KU10K-02853_L01	0.925893	0.475597	healthy_test
KU10K-02951	KU10K-02951_L01	0.92718	0.475258	healthy_test
KU10K-02200	KU10K-02200_L01	0.928393	0.475203	healthy_test
KU10K-02826	KU10K-02826_L01	0.928535	0.474725	healthy_test
KU10K-02988	KU10K-02988_L01	0.900568	0.473045	healthy_test
KU10K-03044	KU10K-03044_L01	0.922764	0.472597	healthy_test
