# Supplementary material for: Dynamic and reversible transcriptomic age shifts induced by COVID-19 in Korean whole blood
Source: Aging (Albany NY). 2025 Jun 10;17(6):1484–510. doi: 10.18632/aging.206270 (PMC12245201; doi:10.18632/aging.206270)
Supplement: Supplementary Table 8 [file aging-17-206270-s007.xlsx]

## Sheet: Supplementary Table 7
Supplementary Table 8. Total Mapping Read Number and Rate of RNA-seq data from 901 samples used in analysis.
SampleID	Total_Mapping_Read_Number	Total_Mapping_Rate (%)	Group
KU10K-04052	20372772	71.03	anxiety
KU10K-04055	24363219	70.01	anxiety
KU10K-04064	25042502	70.46	anxiety
KU10K-04065	27271270	70.06	anxiety
AX74	22055735	70.45	anxiety
KU10K-04014	16723921	80.69	anxiety
KU10K-04016	15481963	76.47	anxiety
KU10K-04018	14510425	76.57	anxiety
KU10K-04019	17151226	83.7	anxiety
KU10K-04020	18577140	84.67	anxiety
KU10K-04021	17173570	78.76	anxiety
KU10K-04022	17541040	83.84	anxiety
KU10K-04023	22802952	82.13	anxiety
KU10K-04024	18990023	85.37	anxiety
KU10K-04027	22755532	83.23	anxiety
KU10K-04028	16147352	83.9	anxiety
KU10K-04029	17721098	78.35	anxiety
KU10K-04031	20962153	82.52	anxiety
KU10K-04032	19637039	84.33	anxiety
KU10K-04034	20098246	83.86	anxiety
KU10K-04036	16093124	84.45	anxiety
KU10K-04037	20678263	80.83	anxiety
KU10K-04038	21247985	82.09	anxiety
KU10K-04039	17180139	84.06	anxiety
KU10K-04041	18439003	79.48	anxiety
KU10K-04042	16921281	81.03	anxiety
KU10K-04043	18160464	80	anxiety
KU10K-04045	16356969	82.6	anxiety
KU10K-04046	18107275	82.98	anxiety
KU10K-04047	17277371	80.7	anxiety
KU10K-03574	27298253	94.75	depression
KU10K-03540	29838590	94.34	depression
KU10K-03541	26468706	97.27	depression
KU10K-03542	32453717	93.57	depression
KU10K-03543	32392528	93.13	depression
KU10K-03544	29740204	97.32	depression
KU10K-03545	28214566	95.65	depression
KU10K-03550	30524371	97.54	depression
KU10K-03558	30194533	89.7	depression
KU10K-03559	27700452	94.61	depression
KU10K-03556	30935353	94.92	depression
KU10K-03561	30802348	93.73	depression
KU10K-03571	38994556	94.37	depression
KU10K-03562	28093976	94.58	depression
KU10K-03573	31618033	94.3	depression
KU10K-03564	45044670	91.46	depression
KU10K-03565	44134383	91.62	depression
KU10K-03566	44644317	93.5	depression
ST12	18064232	70.46	depression
ST16	17321228	71.42	depression
ST17	18028389	71.21	depression
ST40	21070492	76.53	depression
ST41	11720766	74.88	depression
ST46	11295538	83.21	depression
ST47	15887855	76.38	depression
KU10K-04000	18470986	79.53	depression
KU10K-04003	17781308	80.15	depression
KU10K-04004	15782574	75.67	depression
KU10K-04006	12416065	72.82	depression
KU10K-04007	15176491	80.51	depression
KU10K-04010	21292951	82.28	depression
KU10K-00922	31756484	91.32	healthy_test
KU10K-02029	31518352	88.71	healthy_test
KU10K-02150	31789924	91.08	healthy_test
KU10K-02165	32724710	91.57	healthy_test
KU10K-02173	31484243	90	healthy_test
KU10K-02192	32738132	92.2	healthy_test
KU10K-02200	31790246	91.4	healthy_test
KU10K-02240	32893014	91.67	healthy_test
KU10K-02283	31729383	90.66	healthy_test
KU10K-02291	31771361	90.15	healthy_test
KU10K-02306	32227390	90.34	healthy_test
KU10K-02330	32492849	91.62	healthy_test
KU10K-02331	32443701	90.93	healthy_test
KU10K-02343	32547807	92.5	healthy_test
KU10K-02381	32794618	93.1	healthy_test
KU10K-02392	32612475	92.18	healthy_test
KU10K-02402	32644625	90.98	healthy_test
KU10K-02407	33103009	92.55	healthy_test
KU10K-02408	32369786	90.97	healthy_test
KU10K-02418	32309369	91.07	healthy_test
KU10K-02454	20612853	91.43	healthy_test
KU10K-02466	32414369	90.82	healthy_test
KU10K-02496	32609346	91.61	healthy_test
KU10K-02500	32124944	90.86	healthy_test
KU10K-02515	32111575	91.54	healthy_test
KU10K-02524	32199881	91.48	healthy_test
KU10K-02531	31545003	90.42	healthy_test
KU10K-02532	32989885	91.59	healthy_test
KU10K-02536	32071579	92.1	healthy_test
KU10K-02543	31477801	89.47	healthy_test
KU10K-02557	32266195	92.25	healthy_test
KU10K-02558	32175540	90.25	healthy_test
KU10K-02559	31942938	88.64	healthy_test
KU10K-02567	32558940	90.97	healthy_test
KU10K-02578	31849433	89.1	healthy_test
KU10K-02612	32588038	89.06	healthy_test
KU10K-02622	31734874	91.9	healthy_test
KU10K-02636	30356514	91.23	healthy_test
KU10K-02643	32720210	92.02	healthy_test
KU10K-02681	31872088	90.9	healthy_test
KU10K-02683	29254871	92.23	healthy_test
KU10K-02688	32694429	89.92	healthy_test
KU10K-02689	32483020	91.89	healthy_test
KU10K-02690	32349982	92.24	healthy_test
KU10K-02700	32085166	91.48	healthy_test
KU10K-02732	32357163	91.17	healthy_test
KU10K-02765	32348976	91.42	healthy_test
KU10K-02767	33013676	91.86	healthy_test
KU10K-02769	32014683	90.22	healthy_test
KU10K-02776	32029958	90.16	healthy_test
KU10K-02777	32488320	90.8	healthy_test
KU10K-02786	31805026	90.48	healthy_test
KU10K-02826	32828624	91.86	healthy_test
KU10K-02838	32425191	92.25	healthy_test
KU10K-02840	31602739	89.31	healthy_test
KU10K-02848	32304004	91.79	healthy_test
KU10K-02851	32232489	90.95	healthy_test
KU10K-02853	31833898	90.93	healthy_test
KU10K-02876	32482716	91.07	healthy_test
KU10K-02881	32245119	90.85	healthy_test
KU10K-02915	31895405	90.33	healthy_test
KU10K-02917	32136592	92.17	healthy_test
KU10K-02920	32541055	93.02	healthy_test
KU10K-02932	32073357	91.02	healthy_test
KU10K-02936	31977699	90.43	healthy_test
KU10K-02951	32631786	92.27	healthy_test
KU10K-02955	31312992	88.4	healthy_test
KU10K-02959	31956364	89.68	healthy_test
KU10K-02960	31718974	90.65	healthy_test
KU10K-02966	18580630	90.7	healthy_test
KU10K-02967	32693662	91.97	healthy_test
KU10K-02968	32302953	90.78	healthy_test
KU10K-02976	31846191	90.18	healthy_test
KU10K-02984	24165940	90.88	healthy_test
KU10K-02986	32572255	91.09	healthy_test
KU10K-02988	110	90.91	healthy_test
KU10K-02989	31882661	89.87	healthy_test
KU10K-02990	31968764	89.84	healthy_test
KU10K-02991	28275607	89.83	healthy_test
KU10K-02992	32395359	91.44	healthy_test
KU10K-02997	31662928	88.46	healthy_test
KU10K-03002	33012165	92.7	healthy_test
KU10K-03003	32892951	92.66	healthy_test
KU10K-03007	32816921	92.86	healthy_test
KU10K-03008	32340460	91.77	healthy_test
KU10K-03009	32224391	92.05	healthy_test
KU10K-03019	31803387	90.89	healthy_test
KU10K-03027	31865039	90.46	healthy_test
KU10K-03028	32479156	90.53	healthy_test
KU10K-03030	33368444	93.76	healthy_test
KU10K-03032	32794903	92.3	healthy_test
KU10K-03034	32681834	91.77	healthy_test
KU10K-03042	32364166	90.11	healthy_test
KU10K-03043	32387600	90.17	healthy_test
KU10K-03044	30178783	92.95	healthy_test
KU10K-03046	32592485	92.31	healthy_test
KU10K-03715	24947975	85.21	healthy_train
KU10K-03795	42188402	86.27	healthy_train
KU10K-03778	54171268	89.52	healthy_train
KU10K-03662	27170205	94.36	healthy_train
KU10K-03663	30432257	97.34	healthy_train
KU10K-03853	55325118	88.33	healthy_train
KU10K-03664	31518544	97.1	healthy_train
KU10K-03836	49780582	83.94	healthy_train
KU10K-03808	58747447	88.52	healthy_train
KU10K-03835	49855743	90.61	healthy_train
KU10K-03883	50212531	86.61	healthy_train
KU10K-03862	52741315	85.4	healthy_train
KU10K-03794	41784468	82.65	healthy_train
KU10K-03717	22516152	83.28	healthy_train
KU10K-03718	29951446	97.31	healthy_train
KU10K-03665	30166885	95.2	healthy_train
KU10K-03868	53855787	89.52	healthy_train
KU10K-03781	44647362	82.44	healthy_train
KU10K-03667	32209944	96.78	healthy_train
KU10K-03721	31834491	84.11	healthy_train
KU10K-03722	30050649	83.17	healthy_train
KU10K-03875	52486130	90.09	healthy_train
KU10K-03807	39542913	89.35	healthy_train
KU10K-03847	52945860	91.29	healthy_train
KU10K-03766	48069971	85.99	healthy_train
KU10K-03668	31959226	97.09	healthy_train
KU10K-03874	59789581	89.58	healthy_train
KU10K-03669	27985984	97.43	healthy_train
KU10K-03881	54989185	91	healthy_train
KU10K-03842	48609793	88.07	healthy_train
KU10K-03670	31639904	96.28	healthy_train
KU10K-03723	29529953	97	healthy_train
KU10K-03852	59348094	91.21	healthy_train
KU10K-03825	49966949	84.65	healthy_train
KU10K-03671	28533835	97.2	healthy_train
KU10K-03672	27968088	96.32	healthy_train
KU10K-03846	54664863	91.53	healthy_train
KU10K-03673	37614469	97.1	healthy_train
KU10K-03724	23355864	84.27	healthy_train
KU10K-03674	29534017	96.45	healthy_train
KU10K-03947	56189498	90.29	healthy_train
KU10K-03775	48962190	87.45	healthy_train
KU10K-03834	48743152	90.13	healthy_train
KU10K-03867	52572815	86.16	healthy_train
KU10K-03870	52154740	89.78	healthy_train
KU10K-03769	48442236	87.9	healthy_train
KU10K-03802	48062854	85.66	healthy_train
KU10K-03855	49663974	88.67	healthy_train
KU10K-03801	45436460	85.96	healthy_train
KU10K-03827	51981653	84.89	healthy_train
KU10K-03805	50436892	91.25	healthy_train
KU10K-03763	47111016	88.27	healthy_train
KU10K-03772	50225951	89.62	healthy_train
KU10K-03727	28534199	96.38	healthy_train
KU10K-03792	50737079	89.47	healthy_train
KU10K-03815	44866295	87.64	healthy_train
KU10K-03728	35367946	97.13	healthy_train
KU10K-03729	30378238	97.23	healthy_train
KU10K-03813	49935983	87.72	healthy_train
KU10K-03819	51272006	89.36	healthy_train
KU10K-03731	29942746	97.16	healthy_train
KU10K-03732	24900409	96.81	healthy_train
KU10K-03788	50035884	82.66	healthy_train
KU10K-03858	58652799	92.15	healthy_train
KU10K-03793	40905609	87.3	healthy_train
KU10K-03767	55219546	90.36	healthy_train
KU10K-03734	21344316	82.6	healthy_train
KU10K-03677	30645269	93.7	healthy_train
KU10K-03877	36247923	87.57	healthy_train
KU10K-03678	33947017	94.08	healthy_train
KU10K-03736	20738952	83.48	healthy_train
KU10K-03803	46427553	87.85	healthy_train
KU10K-03737	25378118	82.29	healthy_train
KU10K-03738	26927198	83.15	healthy_train
KU10K-03824	48237112	84.04	healthy_train
KU10K-03833	53798911	88.06	healthy_train
KU10K-03739	24290118	97.46	healthy_train
KU10K-03869	40915465	82.25	healthy_train
KU10K-03680	28598756	97.29	healthy_train
KU10K-03762	49382162	86.03	healthy_train
KU10K-03844	50750442	89.38	healthy_train
KU10K-03814	48319106	84.71	healthy_train
KU10K-03839	50721867	88.87	healthy_train
KU10K-03712	21423925	85.53	healthy_train
KU10K-03943	52836283	90.43	healthy_train
KU10K-03806	47811325	89.84	healthy_train
KU10K-03713	23135003	84.68	healthy_train
KU10K-03764	50086839	83.24	healthy_train
KU10K-03838	48199622	90.15	healthy_train
KU10K-03851	54754961	90.66	healthy_train
KU10K-03823	52805054	88.53	healthy_train
KU10K-03942	52342127	91.35	healthy_train
KU10K-03684	30940271	93.19	healthy_train
KU10K-03837	55836703	89.83	healthy_train
KU10K-03949	63147522	88.37	healthy_train
KU10K-03828	53402150	91.09	healthy_train
KU10K-03871	48711554	85.35	healthy_train
KU10K-03741	26554422	82.51	healthy_train
KU10K-03742	37927881	97.16	healthy_train
KU10K-03780	48562836	85.92	healthy_train
KU10K-03860	56918820	92.73	healthy_train
KU10K-03743	25748515	85.16	healthy_train
KU10K-03830	53087764	90.78	healthy_train
KU10K-03787	48724636	84.16	healthy_train
KU10K-03944	36323562	85.91	healthy_train
KU10K-03864	45115951	88.86	healthy_train
KU10K-03771	49598981	80.25	healthy_train
KU10K-03747	20697331	80.61	healthy_train
KU10K-03809	50735354	85.02	healthy_train
KU10K-03714	24093864	82.88	healthy_train
KU10K-03748	27017373	98.18	healthy_train
KU10K-03749	30291625	97.58	healthy_train
KU10K-03789	53681810	87.25	healthy_train
KU10K-03832	53152877	89.84	healthy_train
KU10K-03865	36064583	87.27	healthy_train
KU10K-03843	50430626	90.42	healthy_train
KU10K-03686	28100278	94.3	healthy_train
KU10K-03782	54130461	87.89	healthy_train
KU10K-03882	45901055	86.64	healthy_train
KU10K-03777	49600665	84.02	healthy_train
KU10K-03854	53745175	86.22	healthy_train
KU10K-03753	27712811	96.82	healthy_train
KU10K-03687	32613959	96.34	healthy_train
KU10K-03754	21700451	81.98	healthy_train
KU10K-03688	33483851	97.24	healthy_train
KU10K-03840	49066147	85.42	healthy_train
KU10K-03878	46570739	82.39	healthy_train
KU10K-03755	36152715	97.35	healthy_train
KU10K-03689	29740491	96.8	healthy_train
KU10K-03757	23022825	82.27	healthy_train
KU10K-03879	52194860	88.64	healthy_train
KU10K-03774	49165746	84.54	healthy_train
KU10K-03785	51859537	87.11	healthy_train
KU10K-03876	50277718	88.52	healthy_train
KU10K-03812	55869881	91.47	healthy_train
KU10K-03783	50841542	86.23	healthy_train
KU10K-03873	36660313	87.63	healthy_train
KU10K-03946	58058297	93.01	healthy_train
KU10K-03820	49163380	83.01	healthy_train
KU10K-03779	44356532	87.57	healthy_train
KU10K-03690	35126447	97.24	healthy_train
KU10K-03691	29010995	95.52	healthy_train
KU10K-03880	53395886	91.43	healthy_train
KU10K-03863	44639113	84.74	healthy_train
KU10K-03761	33349922	96.57	healthy_train
KU10K-00937	28640675	96.46	healthy_train
KU10K-00938	31278022	95.35	healthy_train
KU10K-00940	36100797	96.06	healthy_train
KU10K-01025	66877033	93.58	healthy_train
KU10K-01026	71363393	92.26	healthy_train
KU10K-01027	60723908	94.76	healthy_train
KU10K-01028	73266423	86.05	healthy_train
KU10K-01038	62796763	88.43	healthy_train
KU10K-01040	63339261	88.6	healthy_train
KU10K-01052	61119360	86.62	healthy_train
KU10K-01093	70893187	94.24	healthy_train
KU10K-01096	70945577	88.15	healthy_train
KU10K-01102	69142144	86.09	healthy_train
KU10K-01103	60584064	93.9	healthy_train
KU10K-01104	61458819	89.65	healthy_train
KU10K-01105	72695020	93.71	healthy_train
KU10K-01112	32666304	96.35	healthy_train
KU10K-01113	39049541	90.68	healthy_train
KU10K-01114	32027363	95.25	healthy_train
KU10K-01115	35428354	96.46	healthy_train
KU10K-01116	34147661	96.5	healthy_train
KU10K-01117	33149486	96.38	healthy_train
KU10K-01186	32832263	95.35	healthy_train
KU10K-01244	35487035	89.03	healthy_train
KU10K-01245	33438808	93.75	healthy_train
KU10K-01326	33273013	95.25	healthy_train
KU10K-01327	25507156	92.38	healthy_train
KU10K-01347	28577528	86.82	healthy_train
KU10K-01348	31978132	96.34	healthy_train
KU10K-01352	35641079	95.88	healthy_train
KU10K-01353	31346293	96.44	healthy_train
KU10K-01354	36398870	95.04	healthy_train
KU10K-01355	33281090	95.78	healthy_train
KU10K-01357	32837586	93.47	healthy_train
KU10K-01359	33216748	95.02	healthy_train
KU10K-01360	35605149	95.75	healthy_train
KU10K-01363	30322602	95.42	healthy_train
KU10K-01365	30543292	96.17	healthy_train
KU10K-01369	38574217	94.26	healthy_train
KU10K-01370	35924397	94.5	healthy_train
KU10K-01385	30593918	95.93	healthy_train
KU10K-01391	32698566	94.93	healthy_train
KU10K-01395	36651117	96.93	healthy_train
KU10K-01406	28375095	88.53	healthy_train
KU10K-01407	32167445	96.71	healthy_train
KU10K-01409	29483130	96.09	healthy_train
KU10K-01410	31981222	96.62	healthy_train
KU10K-01413	26940160	89.04	healthy_train
KU10K-01416	31670179	87.48	healthy_train
KU10K-01423	26767973	95.18	healthy_train
KU10K-01424	25757947	90.82	healthy_train
KU10K-01426	29291510	80.23	healthy_train
KU10K-01434	31154531	94.32	healthy_train
KU10K-01435	25498291	94.01	healthy_train
KU10K-01439	29070618	80.41	healthy_train
KU10K-01440	31920998	95.24	healthy_train
KU10K-01445	30674205	93.59	healthy_train
KU10K-01447	30023023	94.45	healthy_train
KU10K-01448	24454504	86.44	healthy_train
KU10K-01451	29609711	93.91	healthy_train
KU10K-01454	28721683	94.03	healthy_train
KU10K-01456	34632601	95.47	healthy_train
KU10K-01458	28755870	81.95	healthy_train
KU10K-01462	28607318	93.53	healthy_train
KU10K-01464	36920020	93.99	healthy_train
KU10K-01466	27211347	85.05	healthy_train
KU10K-01467	26714052	93.24	healthy_train
KU10K-01471	31876653	94.05	healthy_train
KU10K-01475	25768134	83.1	healthy_train
KU10K-01477	27232930	95.46	healthy_train
KU10K-01479	35550142	95.65	healthy_train
KU10K-01483	24121587	80.62	healthy_train
KU10K-01485	125511652	94.7	healthy_train
KU10K-01489	96600886	95.87	healthy_train
KU10K-02735	23832091	71.47	healthy_train
KU10K-04250	23307905	72.12	healthy_train
KU10K-04332	19733589	71.57	healthy_train
KU10K-05210	17437266	74.78	healthy_train
KU10K-05945	20457895	74.58	healthy_train
KU10K-05947	25979319	73.71	healthy_train
KU10K-05949	25611508	77.22	healthy_train
KU10K-05952	21026090	70.53	healthy_train
KU10K-05954	20374094	74.77	healthy_train
KU10K-03575	34518913	95.51	healthy_train
KU10K-03577	35432741	94	healthy_train
KU10K-03579	29756078	95.06	healthy_train
KU10K-03631	30648558	97.56	healthy_train
KU10K-03585	25802317	91.71	healthy_train
KU10K-03586	25292454	96.94	healthy_train
KU10K-03588	26786770	95.77	healthy_train
KU10K-03632	30079943	96.34	healthy_train
KU10K-03630	26454637	96.11	healthy_train
KU10K-03658	30485502	96.33	healthy_train
KU10K-03635	34878367	97.29	healthy_train
KU10K-03636	26912157	97.58	healthy_train
KU10K-03637	33880252	97.27	healthy_train
KU10K-03638	32974032	97.16	healthy_train
KU10K-03639	31972030	97.31	healthy_train
KU10K-03643	29332757	97.39	healthy_train
KU10K-03646	32365960	97.2	healthy_train
KU10K-03647	29200168	97.11	healthy_train
KU10K-03648	33184151	97.43	healthy_train
KU10K-03650	32976326	96.97	healthy_train
KU10K-03651	37083930	97.36	healthy_train
KU10K-03654	30038233	97.24	healthy_train
KU10K-03660	42944186	93.24	healthy_train
KU10K-03590	38347828	93.99	healthy_train
KU10K-03592	36918983	93.85	healthy_train
KU10K-03593	36557652	94.3	healthy_train
KU10K-03594	36612316	93	healthy_train
KU10K-03596	32042848	91.03	healthy_train
KU10K-03598	33601572	91.75	healthy_train
KU10K-03600	36017740	93.13	healthy_train
KU10K-03601	33965691	93.81	healthy_train
KU10K-03607	29539697	90.66	healthy_train
KU10K-03609	38854257	91.18	healthy_train
KU10K-03616	35145049	93.73	healthy_train
KU10K-03617	34205362	93.04	healthy_train
KU10K-03618	30378276	92	healthy_train
KU10K-03622	32153939	91.58	healthy_train
KU10K-03623	31224670	92.26	healthy_train
KU10K-03625	36739386	92.69	healthy_train
KU10K-03626	30198020	92.19	healthy_train
KU10K-03629	42796888	89.1	healthy_train
KU10K-00042	66365803	91.62	healthy_train
KU10K-00073	34705051	93.49	healthy_train
KU10K-00076	33891382	95.16	healthy_train
KU10K-00117	26597308	92.81	healthy_train
KU10K-00156	25689939	92.93	healthy_train
KU10K-00201	25090399	94.33	healthy_train
KU10K-00244	25540648	94.89	healthy_train
KU10K-00284	31252353	93.97	healthy_train
KU10K-00311	81342603	93.59	healthy_train
KU10K-00336	28898158	96.08	healthy_train
KU10K-00338	28189206	96.01	healthy_train
KU10K-00339	25241284	96.02	healthy_train
KU10K-00342	28682222	95.24	healthy_train
KU10K-00343	66681028	93.24	healthy_train
KU10K-00346	68009003	92.91	healthy_train
KU10K-00348	28311778	95.41	healthy_train
KU10K-00353	25495706	95.6	healthy_train
KU10K-00358	26020337	96.26	healthy_train
KU10K-00368	27292301	94.49	healthy_train
KU10K-00370	26477447	95.25	healthy_train
KU10K-00379	49818873	82.41	healthy_train
KU10K-00380	20717619	90.33	healthy_train
KU10K-00406	26293327	94.94	healthy_train
KU10K-00409	64017615	94.06	healthy_train
KU10K-00418	29365144	94.08	healthy_train
KU10K-00422	31961848	95.63	healthy_train
KU10K-00424	31684282	95.11	healthy_train
KU10K-00431	30823940	95.57	healthy_train
KU10K-00434	29634880	93.95	healthy_train
KU10K-00438	33952529	94.05	healthy_train
KU10K-00455	38074862	94.84	healthy_train
KU10K-00467	31032184	95.11	healthy_train
KU10K-00471	32185990	91.66	healthy_train
KU10K-00481	30015528	92.99	healthy_train
KU10K-00482	28364399	93.64	healthy_train
KU10K-00483	34842056	92.99	healthy_train
KU10K-00487	31164247	93.9	healthy_train
KU10K-00493	26919208	91.58	healthy_train
KU10K-00500	28378608	93.19	healthy_train
KU10K-00503	34385608	93.72	healthy_train
KU10K-00504	30534493	93.81	healthy_train
KU10K-00514	34415807	93.68	healthy_train
KU10K-00518	35909279	93.84	healthy_train
KU10K-00519	26628010	94.49	healthy_train
KU10K-00521	30726018	94.56	healthy_train
KU10K-00524	30516540	93.46	healthy_train
KU10K-00528	31781307	94.94	healthy_train
KU10K-00538	30934580	95.2	healthy_train
KU10K-00542	27644328	94.81	healthy_train
KU10K-00545	28570333	94.28	healthy_train
KU10K-00551	37766100	94.89	healthy_train
KU10K-00556	29441266	93.48	healthy_train
KU10K-00560	44232851	94.59	healthy_train
KU10K-00569	41291965	93.83	healthy_train
KU10K-00580	26315548	96.19	healthy_train
KU10K-00581	30488119	96.51	healthy_train
KU10K-00587	27449512	95.58	healthy_train
KU10K-00588	31478267	96.23	healthy_train
KU10K-00593	29680280	96.27	healthy_train
KU10K-00617	60870778	94.54	healthy_train
KU10K-00766	37704119	95.93	healthy_train
KU10K-00777	29778245	93.17	healthy_train
KU10K-00778	37743275	92.31	healthy_train
KU10K-00779	33395855	94.37	healthy_train
KU10K-00780	32920417	92.38	healthy_train
KU10K-00797	88954394	95.46	healthy_train
KU10K-00798	66470947	94.6	healthy_train
KU10K-00815	31441094	95.1	healthy_train
KU10K-00816	33320100	95.45	healthy_train
KU10K-00820	70156994	92.08	healthy_train
KU10K-00823	63181545	92.66	healthy_train
KU10K-00826	37304828	94.87	healthy_train
KU10K-00836	46725349	86.84	healthy_train
KU10K-00842	31389954	94.09	healthy_train
KU10K-00857	31980726	95.33	healthy_train
KU10K-00861	36124940	95.9	healthy_train
KU10K-00862	32759387	91.61	healthy_train
KU10K-00868	26995679	93.7	healthy_train
KU10K-00872	41670169	91.8	healthy_train
KU10K-00873	34114572	92.25	healthy_train
KU10K-00892	33917625	96.5	healthy_train
KU10K-03866	37181583	85.53	healthy_valid
KU10K-03716	23077157	82.87	healthy_valid
KU10K-03810	45990745	85.77	healthy_valid
KU10K-03773	47888016	86.93	healthy_valid
KU10K-03666	29053244	94.96	healthy_valid
KU10K-03817	51244654	85.23	healthy_valid
KU10K-03857	51727613	88.97	healthy_valid
KU10K-03845	47615488	85.73	healthy_valid
KU10K-03776	49015184	85.44	healthy_valid
KU10K-03725	21893084	82.86	healthy_valid
KU10K-03804	47281645	91.02	healthy_valid
KU10K-03861	58972240	89.38	healthy_valid
KU10K-03822	49927637	90.4	healthy_valid
KU10K-03726	24850770	84.59	healthy_valid
KU10K-03730	23102636	83.74	healthy_valid
KU10K-03786	51763363	86.73	healthy_valid
KU10K-03735	26107958	84.68	healthy_valid
KU10K-03945	50607185	89.34	healthy_valid
KU10K-03800	45699383	86.22	healthy_valid
KU10K-03784	54922190	92.75	healthy_valid
KU10K-03679	29810208	96.87	healthy_valid
KU10K-03681	36454504	97.46	healthy_valid
KU10K-03818	54885694	88.91	healthy_valid
KU10K-03682	31455745	95.6	healthy_valid
KU10K-03948	46945058	87.81	healthy_valid
KU10K-03850	48692455	87.45	healthy_valid
KU10K-03685	34456304	97.26	healthy_valid
KU10K-03744	27429673	97.72	healthy_valid
KU10K-03816	50166303	85.35	healthy_valid
KU10K-03746	29953766	97.62	healthy_valid
KU10K-03841	48646501	86.27	healthy_valid
KU10K-03765	47700111	86.46	healthy_valid
KU10K-03796	43990506	83.3	healthy_valid
KU10K-03826	47693492	85.66	healthy_valid
KU10K-03750	25767890	97.37	healthy_valid
KU10K-03752	23851093	80.55	healthy_valid
KU10K-03756	20376927	85.04	healthy_valid
KU10K-03848	44375065	89.02	healthy_valid
KU10K-03758	25363900	97	healthy_valid
KU10K-03759	29227578	82.68	healthy_valid
KU10K-03797	42315876	84.62	healthy_valid
KU10K-03790	54839859	88.17	healthy_valid
KU10K-03831	51713094	87.48	healthy_valid
KU10K-03760	31534619	96.74	healthy_valid
KU10K-01092	67431443	85.89	healthy_valid
KU10K-01101	67908296	92.45	healthy_valid
KU10K-01243	34323472	96.31	healthy_valid
KU10K-01399	34118086	97.26	healthy_valid
KU10K-01401	25339158	97.05	healthy_valid
KU10K-01417	29839064	94.49	healthy_valid
KU10K-01422	26796142	95.24	healthy_valid
KU10K-01433	30759724	94.63	healthy_valid
KU10K-01446	33970148	92.93	healthy_valid
KU10K-01453	28670429	91.99	healthy_valid
KU10K-01469	30770200	94.85	healthy_valid
KU10K-01474	24955984	94.07	healthy_valid
KU10K-01480	28425792	93.74	healthy_valid
KU10K-01484	28609999	93.76	healthy_valid
KU10K-02793	23888780	70.04	healthy_valid
KU10K-02856	21346865	70.62	healthy_valid
KU10K-04873	18619311	71.06	healthy_valid
KU10K-04958	16755762	72.9	healthy_valid
KU10K-05955	17941243	71.09	healthy_valid
KU10K-03578	33883532	95.55	healthy_valid
KU10K-03587	27602130	95.36	healthy_valid
KU10K-03657	25409180	92.85	healthy_valid
KU10K-03641	32095160	96.89	healthy_valid
KU10K-03642	32827075	96.41	healthy_valid
KU10K-03653	30997899	97.49	healthy_valid
KU10K-03606	36515802	92.92	healthy_valid
KU10K-00128	73787174	89.33	healthy_valid
KU10K-00141	28846507	93	healthy_valid
KU10K-00262	32643820	94.35	healthy_valid
KU10K-00288	73412494	92.76	healthy_valid
KU10K-00351	25224287	95.03	healthy_valid
KU10K-00374	57766417	86.58	healthy_valid
KU10K-00390	27102641	94.38	healthy_valid
KU10K-00414	96492186	94.9	healthy_valid
KU10K-00423	34501526	94.3	healthy_valid
KU10K-00436	39485377	92.94	healthy_valid
KU10K-00499	28291533	95.53	healthy_valid
KU10K-00553	36575451	93.74	healthy_valid
KU10K-00554	25429443	93.73	healthy_valid
KU10K-00572	42898474	94.36	healthy_valid
KU10K-00592	29380186	96.32	healthy_valid
KU10K-00694	16034922	70.08	healthy_valid
KU10K-00799	87447906	93.64	healthy_valid
KU10K-00822	42949770	93.22	healthy_valid
KU10K-00825	40246094	95.44	healthy_valid
KU10K-00867	41900298	93.09	healthy_valid
KU10K-00158	26450268	89.59	suicide_attempt
KU10K-00578	32333809	91.54	suicide_attempt
KU10K-00051	27754119	89	suicide_attempt
KU10K-00281	29283471	85.47	suicide_attempt
KU10K-00245	31072582	92.68	suicide_attempt
KU10K-03482	33048029	97.33	suicide_attempt
KU10K-03484	27689600	95.87	suicide_attempt
KU10K-03487	27784350	95.67	suicide_attempt
KU10K-03488	25776995	95.84	suicide_attempt
KU10K-03490	29559957	95.72	suicide_attempt
KU10K-03492	27969056	95.58	suicide_attempt
KU10K-03493	32805524	95.57	suicide_attempt
KU10K-03494	27237241	96.44	suicide_attempt
KU10K-03496	30436264	97.13	suicide_attempt
KU10K-03497	28543119	95.54	suicide_attempt
KU10K-03498	30852510	97.09	suicide_attempt
KU10K-03499	32353815	96.94	suicide_attempt
KU10K-03501	26611121	93.14	suicide_attempt
KU10K-03503	28511946	96.74	suicide_attempt
KU10K-03504	40065434	97.55	suicide_attempt
KU10K-03506	27077631	96.15	suicide_attempt
KU10K-03509	29508280	96.14	suicide_attempt
KU10K-03510	27345891	96.06	suicide_attempt
KU10K-03531	32905435	92.39	suicide_attempt
KU10K-03518	26748703	89.84	suicide_attempt
KU10K-03519	31467072	93.97	suicide_attempt
KU10K-03526	38176072	90.58	suicide_attempt
KU10K-03528	44672869	92.23	suicide_attempt
KU10K-03529	45802574	94.14	suicide_attempt
C19-R001-L1	21428180	84.15	viral_recov
C19-R001-V1	25587782	86.93	viral_recov
C19-R002-V1	46704576	93.46	viral_recov
C19-R003-V1	33315344	92.89	viral_recov
C19-R004-V1	29347383	89.53	viral_recov
C19-R005-V1	29231063	92.18	viral_recov
C19-R006-V1	34357499	88.44	viral_recov
C19-R007-V1	30483317	92.8	viral_recov
C19-R008-V1	31757685	91.69	viral_recov
C19-R009-V1	45103329	91.02	viral_recov
C19-R010-L1	31776405	86.68	viral_recov
C19-R010-V1	33951134	92.59	viral_recov
C19-R012-V1	33355062	85.47	viral_recov
C19-R013-V1	33859659	93.01	viral_recov
C19-R014-V1	32625614	90.76	viral_recov
C19-R015-V1	29949018	88.45	viral_recov
C19-R018-V1	36585045	78.19	viral_recov
C19-R019-V1	38988036	87.44	viral_recov
C19-R020-V1	36801941	89.4	viral_recov
C19-R021-V1	28404487	86.73	viral_recov
C19-R022-V1	34853835	88.43	viral_recov
C19-R023-V1	28723798	89.76	viral_recov
C19-R024-L1	22747368	87.6	viral_recov
C19-R024-V1	36089387	89.23	viral_recov
C19-R025-V1	34572027	91.42	viral_recov
C19-R026-V1	31122122	91.42	viral_recov
C19-R027-V1	26189227	85.76	viral_recov
C19-R028-L1	33249629	92.3	viral_recov
C19-R028-V1	41604025	88.18	viral_recov
C19-R029-V1	30835822	89.94	viral_recov
C19-R030-L1	41756107	90.99	viral_recov
C19-R030-V1	31331548	86.94	viral_recov
C19-R031-V1	38401588	87.49	viral_recov
C19-R032-V1	42871549	87.45	viral_recov
C19-R033-V1	37694781	88.72	viral_recov
C19-R034-V1	35379507	90.21	viral_recov
C19-R036-V1	39185259	87.76	viral_recov
C19-R037-V1	27205964	85.26	viral_recov
C19-R038-V1	35066074	84.78	viral_recov
C19-R039-V1	35702476	90.07	viral_recov
C19-R040-V1	29813842	85.63	viral_recov
C19-R041-V1	32371959	85.48	viral_recov
C19-R042-V1	32354521	90.91	viral_recov
C19-R044-V1	41506904	88.21	viral_recov
C19-R047-V1	42572357	87.71	viral_recov
C19-R049-V1	41197425	91.08	viral_recov
C19-R050-V1	32538738	85.03	viral_recov
C19-R051-V1	36927610	94.04	viral_recov
C19-R052-V1	33062992	85.82	viral_recov
C19-R053-V1	33144006	88.85	viral_recov
C19-R054-V1	30891839	83.28	viral_recov
C19-R055-V1	35995512	87.39	viral_recov
C19-R057-V1	30310798	84.06	viral_recov
C19-R058-V1	35654426	89.24	viral_recov
C19-R059-V1	39381242	84.17	viral_recov
C19-R060-V1	33748131	88.69	viral_recov
C19-R061-V1	28751455	86.14	viral_recov
C19-R062-V1	29429520	86.28	viral_recov
C19-R065-V1	27311014	85.76	viral_recov
C19-R066-V1	32622462	86.05	viral_recov
C19-R067-V1	32840905	88.65	viral_recov
C19-R068-V1	38871473	88.84	viral_recov
C19-R069-V1	30624756	83.35	viral_recov
C19-R070-V1	41704186	88.41	viral_recov
C19-R071-V1	30570104	85.2	viral_recov
C19-R073-V1	33687556	90.85	viral_recov
C19-R074-V1	36967185	89.09	viral_recov
C19-R075-V1	32783945	92.19	viral_recov
C19-R076-V1	25621785	89.84	viral_recov
C19-R077-V1	30636226	91.39	viral_recov
C19-R078-L1	29234431	90.61	viral_recov
C19-R078-V1	42896967	88.72	viral_recov
C19-R080-V1	37026197	85.45	viral_recov
C19-R081-L1	33469529	86.41	viral_recov
C19-R081-V1	45978605	83.9	viral_recov
C19-R082-V1	34566367	92.3	viral_recov
C19-R083-V1	33229814	83.84	viral_recov
C19-R084-V1	32048531	88.5	viral_recov
C19-R085-V1	31224131	83	viral_recov
C19-R086-V1	32208659	87.17	viral_recov
C19-R087-V1	36700609	91.53	viral_recov
C19-R088-V1	30086003	87.9	viral_recov
C19-R089-V1	27005323	90.4	viral_recov
C19-R090-V1	32520358	91.72	viral_recov
C19-R091-V1	29322357	84.93	viral_recov
C19-R092-L1	29839446	87.47	viral_recov
C19-R092-V1	37239342	85.73	viral_recov
C19-R093-V1	38603712	84.7	viral_recov
C19-R094-V1	32684803	88.46	viral_recov
C19-R095-V1	43358985	89.21	viral_recov
C19-R096-L1	30256758	87.71	viral_recov
C19-R096-V1	34492092	79.15	viral_recov
C19-R097-V1	29789329	92.28	viral_recov
C19-R098-V1	44534721	84.58	viral_recov
C19-R099-V1	39939250	89.95	viral_recov
C19-R100-V1	33329916	86.59	viral_recov
C19-R101-V1	34976452	86.68	viral_recov
C19-R102-V1	34474034	89.81	viral_recov
C19-R103-V1	32712346	89.94	viral_recov
C19-R104-V1	35392495	88.01	viral_recov
C19-R105-V1	29593677	88.2	viral_recov
C19-R106-V1	32121673	87.85	viral_recov
C19-R107-V1	36559438	87.85	viral_recov
C19-R108-V1	31700747	82.31	viral_recov
C19-R109-V1	35472137	83.52	viral_recov
C19-R110-V1	38303639	90.29	viral_recov
C19-R111-V1	33685325	88.89	viral_recov
C19-R112-V1	36081709	88.76	viral_recov
C19-R113-V1	29498640	89.34	viral_recov
C19-R114-V1	35900513	90.68	viral_recov
C19-R115-V1	34150700	89.09	viral_recov
C19-R116-V1	31849781	87.64	viral_recov
C19-R117-V1	15451416	91.74	viral_recov
C19-R118-V1	44220808	90.67	viral_recov
C19-R119-V1	48619150	88.64	viral_recov
C19-R120-V1	49232265	88.27	viral_recov
C19-R121-V1	41532103	86.78	viral_recov
C19-R122-V1	34397903	88.32	viral_recov
C19-R123-V1	41218649	87.44	viral_recov
C19-R124-V1	33200569	87.54	viral_recov
C19-R125-V1	37392451	90.92	viral_recov
C19-R126-V1	38718729	88.71	viral_recov
C19-R127-V1	35664894	85.92	viral_recov
C19-R128-V1	35490143	88.03	viral_recov
C19-R129-V1	37894933	90.7	viral_recov
C19-R131-V1	40375364	90.16	viral_recov
C19-R132-V1	32438162	88.84	viral_recov
C19-R134-V1	29851153	91.98	viral_recov
C19-R135-V1	40292590	87.68	viral_recov
C19-R136-V1	43112704	91.44	viral_recov
C19-R137-V1	39594907	87.64	viral_recov
C19-R138-V1	35563391	88.57	viral_recov
C19-R139-V1	45104054	87.09	viral_recov
C19-R140-V1	37303376	90.11	viral_recov
C19-R141-V1	32973912	87.28	viral_recov
C19-R142-V1	33501962	88.21	viral_recov
C19-R143-V1	37518911	91.37	viral_recov
C19-R144-V1	29717049	89.32	viral_recov
C19-R145-V1	29826390	89.67	viral_recov
C19-R146-V1	34361796	88.67	viral_recov
C19-R147-V1	36322716	90.94	viral_recov
C19-C001-V1	33110787	81.35	viral_v1_long
C19-C002-V1	26447777	83.56	viral_v1_long
C19-C003-V1	36348627	85.3	viral_v1_long
C19-C004-V1	23791752	73.19	viral_v1_long
C19-C005-V1	34808281	89.37	viral_v1_long
C19-C006-V1	26194661	82.89	viral_v1_long
C19-C007-V1	32619277	82.77	viral_v1_long
C19-C008-V1	30609055	82.77	viral_v1_long
C19-C009-V1	40189047	88	viral_v1_long
C19-C010-V1	24593437	78.28	viral_v1_long
C19-C011-V1	25288142	78.41	viral_v1_long
C19-C012-V1	33640430	80.76	viral_v1_long
C19-C013-V1	38814934	82.52	viral_v1_long
C19-C015-V1	29238803	91.36	viral_v1_long
C19-C016-V1	25894578	88.81	viral_v1_long
C19-C017-V1	32389657	83.14	viral_v1_long
C19-C018-V1	29868705	85.36	viral_v1_long
C19-C020-V1	33548772	80.84	viral_v1_long
C19-C021-V1	25113750	74.35	viral_v1_long
C19-C022-V1	41844955	89.29	viral_v1_long
C19-C023-V1	31469633	84.14	viral_v1_long
C19-C024-V1	9898584	81.1	viral_v1_long
C19-C025-V1	25975860	84.28	viral_v1_long
C19-C026-V1	30059515	88.67	viral_v1_long
C19-C027-V1	35717582	86.71	viral_v1_long
C19-C028-V1	27529499	89.48	viral_v1_long
C19-C029-V1	27513438	90.15	viral_v1_long
C19-C030-V1	28446569	84.58	viral_v1_long
C19-C031-V1	22745137	80.4	viral_v1_long
C19-C032-V1	34022735	90.15	viral_v1_long
C19-C033-V1	27431230	80.67	viral_v1_long
C19-C034-V1	28242166	83.56	viral_v1_long
C19-C035-V1	38232850	90.88	viral_v1_long
C19-C036-V1	35158443	83.64	viral_v1_long
C19-C037-V1	28610652	84.79	viral_v1_long
C19-C038-V1	18233246	84.19	viral_v1_long
C19-C039-V1	25911489	78.65	viral_v1_long
C19-C040-V1	19848843	84.88	viral_v1_long
C19-C041-V1	26324072	81.19	viral_v1_long
C19-C042-V1	33137774	94.93	viral_v1_long
C19-C043-V1	29419302	89.21	viral_v1_long
C19-C044-V1	19333882	89.54	viral_v1_long
C19-C046-V1	50933501	87.16	viral_v1_long
C19-C048-V1	34026554	88.94	viral_v1_long
C19-C049-V1	32986564	87.21	viral_v1_long
C19-C057-V1	38596083	84.63	viral_v1_long
C19-C058-V1	29669215	78.6	viral_v1_long
C19-C059-V1	35277996	83.69	viral_v1_long
C19-C001-V2	29325210	86.8	viral_v2_long
C19-C002-V2	27428441	85.76	viral_v2_long
C19-C003-V2	29333523	84.69	viral_v2_long
C19-C004-V2	35882450	86.36	viral_v2_long
C19-C005-V2	29297427	91.72	viral_v2_long
C19-C007-V2	28539659	84.6	viral_v2_long
C19-C008-V2	36031631	87.8	viral_v2_long
C19-C009-V2	33897841	89.9	viral_v2_long
C19-C010-V2	32216240	77.09	viral_v2_long
C19-C011-V2	29118577	84.33	viral_v2_long
C19-C012-V2	29806656	89.22	viral_v2_long
C19-C013-V2	37634095	93.3	viral_v2_long
C19-C015-V2	33857333	78.64	viral_v2_long
C19-C016-V2	36574068	86.8	viral_v2_long
C19-C017-V2	39120290	90.47	viral_v2_long
C19-C018-V2	40036826	87.92	viral_v2_long
C19-C020-V2	37062964	91.74	viral_v2_long
C19-C021-V2	29759324	75.51	viral_v2_long
C19-C022-V2	38136244	87.95	viral_v2_long
C19-C023-V2	28949248	85.99	viral_v2_long
C19-C024-V2	26240004	86.04	viral_v2_long
C19-C025-V2	25271289	82.48	viral_v2_long
C19-C026-V2	28165158	83.98	viral_v2_long
C19-C027-V2	29398063	85.87	viral_v2_long
C19-C028-V2	35804654	90.68	viral_v2_long
C19-C029-V2	29023090	86.73	viral_v2_long
C19-C030-V2	21069537	88.35	viral_v2_long
C19-C031-V2	25408356	87.64	viral_v2_long
C19-C032-V2	22810520	84.88	viral_v2_long
C19-C033-V2	27563134	78.77	viral_v2_long
C19-C034-V2	33634836	85.41	viral_v2_long
C19-C035-V2	36320142	83.82	viral_v2_long
C19-C036-V2	33459708	83.09	viral_v2_long
C19-C037-V2	33202676	89.4	viral_v2_long
C19-C038-V2	34565296	86.95	viral_v2_long
C19-C039-V2	36675741	85.53	viral_v2_long
C19-C041-V2	31506515	81.04	viral_v2_long
C19-C042-V2	32164577	90.71	viral_v2_long
C19-C043-V2	34002055	89.95	viral_v2_long
C19-C044-V2	33151370	87.69	viral_v2_long
C19-C046-V2	34974276	85.83	viral_v2_long
C19-C048-V2	46575994	83.17	viral_v2_long
C19-C049-V2	33805621	87.08	viral_v2_long
C19-C057-V2	47809041	87.91	viral_v2_long
C19-C058-V2	31886522	85.09	viral_v2_long
C19-C001-V3	35109632	89.84	viral_v3_long
C19-C002-V3	30078648	91.22	viral_v3_long
C19-C003-V3	30505735	91.13	viral_v3_long
C19-C004-V3	40533816	89.43	viral_v3_long
C19-C005-V3	38480962	90.17	viral_v3_long
C19-C007-V3	27847777	87.33	viral_v3_long
C19-C008-V3	32097986	85.28	viral_v3_long
C19-C010-V3	34814302	87.98	viral_v3_long
C19-C012-V3	32990406	88.93	viral_v3_long
C19-C013-V3	30593901	83.36	viral_v3_long
C19-C015-V3	26822869	80.41	viral_v3_long
C19-C017-V3	25986331	81.98	viral_v3_long
C19-C018-V3	29569777	84.09	viral_v3_long
C19-C020-V3	32937309	83.38	viral_v3_long
C19-C023-V3	31380942	87.35	viral_v3_long
C19-C024-V3	28480702	89.86	viral_v3_long
C19-C025-V3	35592560	90.21	viral_v3_long
C19-C026-V3	32851255	81.27	viral_v3_long
C19-C027-V3	31075465	87.45	viral_v3_long
C19-C028-V3	29164867	86.68	viral_v3_long
C19-C029-V3	31576261	90.48	viral_v3_long
C19-C030-V3	37230511	90.39	viral_v3_long
C19-C031-V3	27426434	85.45	viral_v3_long
C19-C032-V3	36477517	90.12	viral_v3_long
C19-C033-V3	33161253	86.51	viral_v3_long
C19-C034-V3	32223973	88.97	viral_v3_long
C19-C035-V3	44233690	90.94	viral_v3_long
C19-C036-V3	28740397	87.2	viral_v3_long
C19-C037-V3	22080741	91.26	viral_v3_long
C19-C038-V3	6888059	85.59	viral_v3_long
C19-C039-V3	46272885	90.74	viral_v3_long
C19-C041-V3	34037454	88.97	viral_v3_long
C19-C042-V3	33312895	94.94	viral_v3_long
C19-C043-V3	33642911	90.01	viral_v3_long
C19-C044-V3	34276766	90.27	viral_v3_long
C19-C046-V3	45428221	87.9	viral_v3_long
C19-C048-V3	32713722	91.3	viral_v3_long
C19-C049-V3	62283150	87.52	viral_v3_long
C19-C057-V3	39212825	86.01	viral_v3_long
C19-C058-V3	44091031	85.81	viral_v3_long
C19-C059-V3	30895573	83.08	viral_v3_long
