# Supplementary material for: Dynamic and reversible transcriptomic age shifts induced by COVID-19 in Korean whole blood
Source: Aging (Albany NY). 2025 Jun 10;17(6):1484–510. doi: 10.18632/aging.206270 (PMC12245201; doi:10.18632/aging.206270)
Supplement: Supplementary Tables 5 and 6 [file aging-17-206270-s005.pdf]

**Supplementary Table 5. Summary of mixed-effects model analysis of transcriptomic age association (TAA) across infection stages in COVID-19 ARDS (GSE273149) and HCV (GSE119117) cohorts.**

| GSE273149                               | Coef. [95% CI]           | Std.Err. | z      | P> z  |
|-----------------------------------------|--------------------------|----------|--------|-------|
| Intercept[COVID_nonsurvivor; Day 1]     | 46.143 [20.494,71.791]   | 13.086   | 3.526  | 0     |
| disease[COVID_survivor]                 | 29.010 [-9.463,67.482]   | 19.629   | 1.478  | 0.139 |
| time[Day 3]                             | -8.392 [-39.124,22.341]  | 15.68    | -0.535 | 0.593 |
| time[Day 7]                             | 3.188 [-27.544,33.921]   | 15.68    | 0.203  | 0.839 |
| time[Day 10]                            | 9.300 [-23.753,42.352]   | 16.864   | 0.551  | 0.581 |
| disease[COVID_survivor]*time[Day 3]     | -31.677 [-77.776,14.422] | 23.52    | -1.347 | 0.178 |
| disease[COVID_survivor]*time[Day 7]     | -46.621 [-92.720,-0.522] | 23.52    | -1.982 | 0.047 |
| disease[COVID_survivor]*time[Day 10]    | -52.610 [-108.389,3.169] | 28.459   | -1.849 | 0.065 |
| Group Var                               | 241.568                  | 10.905   |        |       |
| GSE119117                               | Coef. [95% CI]           | Std.Err. | z      | P> z  |
| Intercept[Chronic; Pre-infection]       | 7.093 [-5.375,19.561]    | 6.361    | 1.115  | 0.265 |
| hcvgroup[Resolution]                    | -8.576 [-27.621,10.469]  | 9.717    | -0.883 | 0.377 |
| Phase[Early acute]                      | 8.697 [-0.789,18.184]    | 4.84     | 1.797  | 0.072 |
| Phase[Late acute]                       | 2.994 [-5.598,11.586]    | 4.384    | 0.683  | 0.495 |
| Phase[Follow up]                        | 5.588 [-3.004,14.180]    | 4.384    | 1.275  | 0.202 |
| hcvgroup[Resolution]*Phase[Early acute] | 4.937 [-8.789,18.664]    | 7.004    | 0.705  | 0.481 |
| hcvgroup[Resolution]*Phase[Late acute]  | 7.789 [-5.816,21.395]    | 6.942    | 1.122  | 0.262 |
| hcvgroup[Resolution]*Phase[Follow up]   | 0.926 [-12.199,14.050]   | 6.696    | 0.138  | 0.89  |
| Group Var                               | 246.852                  | 14.681   |        |       |

The table presents the results of the mixed-effects regression analysis evaluating the association between infection stage, disease outcome (COVID-19 survival and HCV prognosis), and TAAs. The model incorporates random intercepts to account for inter-individual variability. Coefficient estimates (Coef.), standard errors (Std.Err.), z-values, and p-values ( $P>|z|$ ) are reported for each fixed effect. Wald's test was used to assess the significance of each coefficient, with p-values < 0.05 considered statistically significant. A statistically significant association is highlighted in red.

**Supplementary Table 6. CXCL9 is subtly correlated with chronological age in the whole blood of training data.**

| <b>Cohort name</b> | <b>GeneSymbol</b> | <b>Slope</b> | <b>R^2</b>  | <b>Pearsons'r</b> | <b>FDR</b>  | <b>Test significant ?</b> |
|--------------------|-------------------|--------------|-------------|-------------------|-------------|---------------------------|
| Healthy Train      | CXCL9             | 0.104020911  | 0.022432609 | 0.149775195       | 0.035273179 | TRUE                      |
